# Supplementary material for: Evaluation of strategies for the occupational health risk assessment of chemical toxicants in the workplace based on a quantitative analysis model
Source: Research Square preprint supplement (doi:10.21203/rs.3.rs-1796630/v1), 2022-07-15
Supplement: Supplementary file 1 [file 8938b813e994f370e67a5426.xlsx]

## Sheet: raw data
Industries	Enterprises	Locations	Hazard factors	Daily contact time（hours/day）	Weekly contact frequency（days/week）	Exposure concentration（mg/m3）	Concentration ratio(CR)	Models	Risk level	Risk ratio(RR)
Mining of soil and sand	Mining of soil and sand1	Rig operator	Silicious dust	8	6	0.69	0.99	EPA	#NULL!	#NULL!
Mining of soil and sand	Mining of soil and sand1	Rig operator	Silicious dust	8	6	3.71	5.3	EPA	#NULL!	#NULL!
Mining of soil and sand	Mining of soil and sand1	Excavator driver	Silicious dust	8	6	2.09	2.99	EPA	#NULL!	#NULL!
Mining of soil and sand	Mining of soil and sand1	Excavator driver	Silicious dust	8	6	0.67	0.96	EPA	#NULL!	#NULL!
Mining of soil and sand	Mining of soil and sand1	Excavator driver	Silicious dust	8	6	0.65	0.93	EPA	#NULL!	#NULL!
Mining of soil and sand	Mining of soil and sand1	Transport driver	Silicious dust	8	6	0.66	0.94	EPA	#NULL!	#NULL!
Mining of soil and sand	Mining of soil and sand1	Transport driver	Silicious dust	8	6	1.69	2.41	EPA	#NULL!	#NULL!
Mining of soil and sand	Mining of soil and sand1	Transport driver	Silicious dust	8	6	0.67	0.96	EPA	#NULL!	#NULL!
Mining of soil and sand	Mining of soil and sand1	Transport driver	Silicious dust	8	6	1.94	2.77	EPA	#NULL!	#NULL!
Mining of soil and sand	Mining of soil and sand1	Stope inspector	Silicious dust	8	6	0.67	0.96	EPA	#NULL!	#NULL!
Mining of soil and sand	Mining of soil and sand1	Discharge	Silicious dust	8	6	5.55	7.93	EPA	#NULL!	#NULL!
Mining of soil and sand	Mining of soil and sand1	Discharge	Silicious dust	8	6	7.51	10.73	EPA	#NULL!	#NULL!
Mining of soil and sand	Mining of soil and sand1	Discharge	Silicious dust	8	6	2.6	3.71	EPA	#NULL!	#NULL!
Mining of soil and sand	Mining of soil and sand1	Crushing inspector	Silicious dust	8	6	0.69	0.99	EPA	#NULL!	#NULL!
Mining of soil and sand	Mining of soil and sand1	Crushing inspector	Silicious dust	8	6	0.68	0.97	EPA	#NULL!	#NULL!
Mining of soil and sand	Mining of soil and sand1	Crushing inspector	Silicious dust	8	6	0.69	0.99	EPA	#NULL!	#NULL!
Mining of soil and sand	Mining of soil and sand1	Forklift driver	Silicious dust	8	6	0.67	0.96	EPA	#NULL!	#NULL!
Mining of soil and sand	Mining of soil and sand1	Sprinkler driver	Silicious dust	8	6	0.66	0.94	EPA	#NULL!	#NULL!
Mining of soil and sand	Mining of soil and sand2	Rig operator	Silicious dust	8	6	0.7	1.34	EPA	#NULL!	#NULL!
Mining of soil and sand	Mining of soil and sand2	Excavator driver	Silicious dust	8	6	0.64	0.9	EPA	#NULL!	#NULL!
Mining of soil and sand	Mining of soil and sand2	Transport driver	Silicious dust	8	6	1.5	0.97	EPA	#NULL!	#NULL!
Mining of soil and sand	Mining of soil and sand2	Transport driver	Silicious dust	8	6	0.66	0.94	EPA	#NULL!	#NULL!
Mining of soil and sand	Mining of soil and sand2	Discharge	Silicious dust	8	6	0.47	0.94	EPA	#NULL!	#NULL!
Mining of soil and sand	Mining of soil and sand2	Crushing inspector	Silicious dust	8	6	0.68	0.33	EPA	#NULL!	#NULL!
Mining of soil and sand	Mining of soil and sand2	Forklift driver	Silicious dust	8	6	0.5	0.77	EPA	#NULL!	#NULL!
Mining of soil and sand	Mining of soil and sand2	Sprinkler driver	Silicious dust	8	6	0.74	0.43	EPA	#NULL!	#NULL!
Mining of soil and sand	Mining of soil and sand3	Rig operator	Silicious dust	8	6	0.47	2.3	EPA	#NULL!	#NULL!
Mining of soil and sand	Mining of soil and sand3	Rig operator	Silicious dust	8	6	0.73	21.6	EPA	#NULL!	#NULL!
Mining of soil and sand	Mining of soil and sand3	Excavator driver	Silicious dust	8	6	1.36	2.17	EPA	#NULL!	#NULL!
Mining of soil and sand	Mining of soil and sand3	Excavator driver	Silicious dust	8	6	0.64	0.5	EPA	#NULL!	#NULL!
Mining of soil and sand	Mining of soil and sand3	Excavator driver	Silicious dust	8	6	0.54	0.77	EPA	#NULL!	#NULL!
Mining of soil and sand	Mining of soil and sand3	Transport driver	Silicious dust	8	6	0.77	1.07	EPA	#NULL!	#NULL!
Mining of soil and sand	Mining of soil and sand3	Transport driver	Silicious dust	8	6	0.5	1.53	EPA	#NULL!	#NULL!
Mining of soil and sand	Mining of soil and sand3	Transport driver	Silicious dust	8	6	0.6	0.93	EPA	#NULL!	#NULL!
Mining of soil and sand	Mining of soil and sand3	Stope inspector	Silicious dust	8	6	0.67	2.17	EPA	#NULL!	#NULL!
Mining of soil and sand	Mining of soil and sand3	Stope inspector	Silicious dust	8	6	0.58	1.2	EPA	#NULL!	#NULL!
Mining of soil and sand	Mining of soil and sand3	Discharge	Silicious dust	8	6	0.5	3.27	EPA	#NULL!	#NULL!
Mining of soil and sand	Mining of soil and sand3	Crushing inspector	Silicious dust	8	6	0.52	3.03	EPA	#NULL!	#NULL!
Mining of soil and sand	Mining of soil and sand3	Forklift driver	Silicious dust	8	6	0.6	4.23	EPA	#NULL!	#NULL!
Mining of soil and sand	Mining of soil and sand3	Sprinkler driver	Silicious dust	8	6	0.41	0.8	EPA	#NULL!	#NULL!
Mining of soil and sand	Mining of soil and sand4	Rig operator	Silicious dust	8	6	0.42	0.77	EPA	#NULL!	#NULL!
Mining of soil and sand	Mining of soil and sand4	Excavator driver	Silicious dust	8	6	0.42	0.3	EPA	#NULL!	#NULL!
Mining of soil and sand	Mining of soil and sand4	Transport driver	Silicious dust	8	6	0.48	0.33	EPA	#NULL!	#NULL!
Mining of soil and sand	Mining of soil and sand4	Crushing inspector	Silicious dust	8	6	0.39	0.3	EPA	#NULL!	#NULL!
Mining of soil and sand	Mining of soil and sand4	Sprinkler driver	Silicious dust	8	6	0.64	0.14	EPA	#NULL!	#NULL!
Mining of soil and sand	Mining of soil and sand5	Rig operator	Silicious dust	8	6	0.47	1.29	EPA	#NULL!	#NULL!
Mining of soil and sand	Mining of soil and sand5	Excavator driver	Silicious dust	8	6	0.48	1.29	EPA	#NULL!	#NULL!
Mining of soil and sand	Mining of soil and sand5	Excavator driver	Silicious dust	8	6	0.53	1	EPA	#NULL!	#NULL!
Mining of soil and sand	Mining of soil and sand5	Transport driver	Silicious dust	8	6	0.38	2.43	EPA	#NULL!	#NULL!
Mining of soil and sand	Mining of soil and sand5	Transport driver	Silicious dust	8	6	0.44	3.43	EPA	#NULL!	#NULL!
Mining of soil and sand	Mining of soil and sand5	Stope inspector	Silicious dust	8	6	0.47	2.19	EPA	#NULL!	#NULL!
Mining of soil and sand	Mining of soil and sand5	Crushing inspector	Silicious dust	8	6	0.38	3.71	EPA	#NULL!	#NULL!
Mining of soil and sand	Mining of soil and sand5	Crushing inspector	Silicious dust	8	6	0.34	4.71	EPA	#NULL!	#NULL!
Mining of soil and sand	Mining of soil and sand5	Crushing inspector	Silicious dust	8	6	0.38	4	EPA	#NULL!	#NULL!
Mining of soil and sand	Mining of soil and sand5	Crushing inspector	Silicious dust	8	6	0.41	1.29	EPA	#NULL!	#NULL!
Mining of soil and sand	Mining of soil and sand6	Rig operator	Silicious dust	8	6	0.44	1.29	EPA	#NULL!	#NULL!
Mining of soil and sand	Mining of soil and sand6	Excavator driver	Silicious dust	8	6	0.41	0.8	EPA	#NULL!	#NULL!
Mining of soil and sand	Mining of soil and sand6	Transport driver	Silicious dust	8	6	0.36	0.76	EPA	#NULL!	#NULL!
Mining of soil and sand	Mining of soil and sand6	Crushing inspector	Silicious dust	8	6	0.94	3.17	EPA	#NULL!	#NULL!
Mining of soil and sand	Mining of soil and sand7	Rig operator	Silicious dust	8	6	0.63	3.73	EPA	#NULL!	#NULL!
Mining of soil and sand	Mining of soil and sand7	Excavator driver	Silicious dust	8	6	0.68	1.2	EPA	#NULL!	#NULL!
Mining of soil and sand	Mining of soil and sand7	Excavator driver	Silicious dust	8	6	0.66	0.93	EPA	#NULL!	#NULL!
Mining of soil and sand	Mining of soil and sand7	Excavator driver	Silicious dust	8	6	0.66	0.7	EPA	#NULL!	#NULL!
Mining of soil and sand	Mining of soil and sand7	Transport driver	Silicious dust	8	6	0.23	1.2	EPA	#NULL!	#NULL!
Mining of soil and sand	Mining of soil and sand7	Stope inspector	Silicious dust	8	6	0.54	0.33	EPA	#NULL!	#NULL!
Mining of soil and sand	Mining of soil and sand7	Stope inspector	Silicious dust	8	6	0.3	0.33	EPA	#NULL!	#NULL!
Mining of soil and sand	Mining of soil and sand7	Discharge	Silicious dust	8	6	0.69	0.36	EPA	#NULL!	#NULL!
Mining of soil and sand	Mining of soil and sand7	Crushing inspector	Silicious dust	8	6	6.48	0.99	EPA	#NULL!	#NULL!
Mining of soil and sand	Mining of soil and sand7	Crushing inspector	Silicious dust	8	6	0.65	0.97	EPA	#NULL!	#NULL!
Mining of soil and sand	Mining of soil and sand7	Crushing inspector	Silicious dust	8	6	0.15	0.99	EPA	#NULL!	#NULL!
Mining of soil and sand	Mining of soil and sand7	Forklift driver	Silicious dust	8	6	0.23	0.96	EPA	#NULL!	#NULL!
Mining of soil and sand	Mining of soil and sand7	Sprinkler driver	Silicious dust	8	6	0.32	0.94	EPA	#NULL!	#NULL!
Mining of soil and sand	Mining of soil and sand8	Rig operator	Silicious dust	8	6	0.46	0.21	EPA	#NULL!	#NULL!
Mining of soil and sand	Mining of soil and sand8	Rig operator	Silicious dust	8	6	0.28	0.24	EPA	#NULL!	#NULL!
Mining of soil and sand	Mining of soil and sand8	Rig operator	Silicious dust	8	6	0.65	0.26	EPA	#NULL!	#NULL!
Mining of soil and sand	Mining of soil and sand8	Rig operator	Silicious dust	8	6	0.36	0.19	EPA	#NULL!	#NULL!
Mining of soil and sand	Mining of soil and sand8	Rig operator	Silicious dust	8	6	0.98	0.19	EPA	#NULL!	#NULL!
Mining of soil and sand	Mining of soil and sand8	Rig operator	Silicious dust	8	6	0.91	0.23	EPA	#NULL!	#NULL!
Mining of soil and sand	Mining of soil and sand8	Excavator driver	Silicious dust	8	6	1.27	0.2	EPA	#NULL!	#NULL!
Mining of soil and sand	Mining of soil and sand8	Excavator driver	Silicious dust	8	6	0.24	0.14	EPA	#NULL!	#NULL!
Mining of soil and sand	Mining of soil and sand8	Excavator driver	Silicious dust	8	6	0.54	0.2	EPA	#NULL!	#NULL!
Mining of soil and sand	Mining of soil and sand8	Transport driver	Silicious dust	8	6	0.21	0.2	EPA	#NULL!	#NULL!
Mining of soil and sand	Mining of soil and sand8	Transport driver	Silicious dust	8	6	0.23	0.23	EPA	#NULL!	#NULL!
Mining of soil and sand	Mining of soil and sand8	Transport driver	Silicious dust	8	6	0.21	0.2	EPA	#NULL!	#NULL!
Mining of soil and sand	Mining of soil and sand8	Transport driver	Silicious dust	8	6	0.1	0.24	EPA	#NULL!	#NULL!
Mining of soil and sand	Mining of soil and sand8	Transport driver	Silicious dust	8	6	0.9	0.24	EPA	#NULL!	#NULL!
Mining of soil and sand	Mining of soil and sand8	Transport driver	Silicious dust	8	6	0.9	0.21	EPA	#NULL!	#NULL!
Mining of soil and sand	Mining of soil and sand8	Discharge	Silicious dust	8	6	0.7	0.84	EPA	#NULL!	#NULL!
Mining of soil and sand	Mining of soil and sand8	Discharge	Silicious dust	8	6	1.7	0.63	EPA	#NULL!	#NULL!
Mining of soil and sand	Mining of soil and sand8	Discharge	Silicious dust	8	6	2.4	0.8	EPA	#NULL!	#NULL!
Mining of soil and sand	Mining of soil and sand8	Discharge	Silicious dust	8	6	1.53	0.54	EPA	#NULL!	#NULL!
Mining of soil and sand	Mining of soil and sand8	Discharge	Silicious dust	8	6	2.6	0.57	EPA	#NULL!	#NULL!
Mining of soil and sand	Mining of soil and sand8	Discharge	Silicious dust	8	6	3.3	0.64	EPA	#NULL!	#NULL!
Mining of soil and sand	Mining of soil and sand8	Crushing inspector	Silicious dust	8	6	2.8	0.19	EPA	#NULL!	#NULL!
Mining of soil and sand	Mining of soil and sand8	Crushing inspector	Silicious dust	8	6	0.9	0.23	EPA	#NULL!	#NULL!
Mining of soil and sand	Mining of soil and sand8	Crushing inspector	Silicious dust	8	6	0.9	0.26	EPA	#NULL!	#NULL!
Mining of soil and sand	Mining of soil and sand8	Crushing inspector	Silicious dust	8	6	0.56	0.21	EPA	#NULL!	#NULL!
Mining of soil and sand	Mining of soil and sand8	Crushing inspector	Silicious dust	8	6	0.53	0.26	EPA	#NULL!	#NULL!
Mining of soil and sand	Mining of soil and sand8	Crushing inspector	Silicious dust	8	6	2.22	0.26	EPA	#NULL!	#NULL!
Mining of soil and sand	Mining of soil and sand8	Forklift driver	Silicious dust	8	6	1.12	0.17	EPA	#NULL!	#NULL!
Mining of soil and sand	Mining of soil and sand8	Forklift driver	Silicious dust	8	6	0.36	0.2	EPA	#NULL!	#NULL!
Mining of soil and sand	Mining of soil and sand8	Forklift driver	Silicious dust	8	6	0.28	0.17	EPA	#NULL!	#NULL!
Mining of soil and sand	Mining of soil and sand9	Rig operator	Silicious dust	8	6	0.21	0.59	EPA	#NULL!	#NULL!
Mining of soil and sand	Mining of soil and sand9	Excavator driver	Silicious dust	8	6	0.36	0.3	EPA	#NULL!	#NULL!
Mining of soil and sand	Mining of soil and sand9	Transport driver	Silicious dust	8	6	0.1	0.4	EPA	#NULL!	#NULL!
Mining of soil and sand	Mining of soil and sand9	Crushing inspector	Silicious dust	8	6	0.1	0.47	EPA	#NULL!	#NULL!
Mining of soil and sand	Mining of soil and sand9	Forklift driver	Silicious dust	8	6	0.1	1.16	EPA	#NULL!	#NULL!
Mining of soil and sand	Mining of soil and sand9	Sprinkler driver	Silicious dust	8	6	0.69	0.37	EPA	#NULL!	#NULL!
Mining of soil and sand	Mining of soil and sand10	Rig operator	Silicious dust	8	6	0.68	1	EPA	#NULL!	#NULL!
Mining of soil and sand	Mining of soil and sand10	Excavator driver	Silicious dust	8	6	0.69	0.91	EPA	#NULL!	#NULL!
Mining of soil and sand	Mining of soil and sand10	Transport driver	Silicious dust	8	6	0.67	2.14	EPA	#NULL!	#NULL!
Mining of soil and sand	Mining of soil and sand10	Stope inspector	Silicious dust	8	6	0.66	0.94	EPA	#NULL!	#NULL!
Mining of soil and sand	Mining of soil and sand10	Crushing inspector	Silicious dust	8	6	0.15	0.67	EPA	#NULL!	#NULL!
Mining of soil and sand	Mining of soil and sand10	Forklift driver	Silicious dust	8	6	0.17	0.97	EPA	#NULL!	#NULL!
Mining of soil and sand	Mining of soil and sand10	Sprinkler driver	Silicious dust	8	6	0.18	0.71	EPA	#NULL!	#NULL!
Mining of soil and sand	Mining of soil and sand11	Rig operator	Silicious dust	8	6	0.13	1.06	EPA	#NULL!	#NULL!
Mining of soil and sand	Mining of soil and sand11	Rig operator	Silicious dust	8	6	0.13	0.67	EPA	#NULL!	#NULL!
Mining of soil and sand	Mining of soil and sand11	Excavator driver	Silicious dust	8	6	0.16	1.04	EPA	#NULL!	#NULL!
Mining of soil and sand	Mining of soil and sand11	Transport driver	Silicious dust	8	6	0.14	1.94	EPA	#NULL!	#NULL!
Mining of soil and sand	Mining of soil and sand11	Stope inspector	Silicious dust	8	6	0.1	0.91	EPA	#NULL!	#NULL!
Mining of soil and sand	Mining of soil and sand11	Crushing inspector	Silicious dust	8	6	0.14	0.77	EPA	#NULL!	#NULL!
Mining of soil and sand	Mining of soil and sand11	Forklift driver	Silicious dust	8	6	0.14	1.1	EPA	#NULL!	#NULL!
Mining of soil and sand	Mining of soil and sand11	Sprinkler driver	Silicious dust	8	6	0.16	0.71	EPA	#NULL!	#NULL!
Mining of soil and sand	Mining of soil and sand12	Excavator driver	Silicious dust	8	6	0.14	0.86	EPA	#NULL!	#NULL!
Mining of soil and sand	Mining of soil and sand12	Excavator driver	Silicious dust	8	6	0.17	0.96	EPA	#NULL!	#NULL!
Mining of soil and sand	Mining of soil and sand12	Excavator driver	Silicious dust	8	6	0.17	0.83	EPA	#NULL!	#NULL!
Mining of soil and sand	Mining of soil and sand12	Excavator driver	Silicious dust	8	6	0.15	0.71	EPA	#NULL!	#NULL!
Mining of soil and sand	Mining of soil and sand12	Excavator driver	Silicious dust	8	6	0.59	0.74	EPA	#NULL!	#NULL!
Mining of soil and sand	Mining of soil and sand12	Excavator driver	Silicious dust	8	6	0.44	0.86	EPA	#NULL!	#NULL!
Mining of soil and sand	Mining of soil and sand12	Transport driver	Silicious dust	8	6	0.56	0.59	EPA	#NULL!	#NULL!
Mining of soil and sand	Mining of soil and sand12	Transport driver	Silicious dust	8	6	0.38	0.6	EPA	#NULL!	#NULL!
Mining of soil and sand	Mining of soil and sand12	Stope inspector	Silicious dust	8	6	0.4	0.6	EPA	#NULL!	#NULL!
Mining of soil and sand	Mining of soil and sand12	Stope inspector	Silicious dust	8	6	0.45	0.69	EPA	#NULL!	#NULL!
Mining of soil and sand	Mining of soil and sand12	Stope inspector	Silicious dust	8	6	0.13	0.56	EPA	#NULL!	#NULL!
Mining of soil and sand	Mining of soil and sand12	Discharge	Silicious dust	8	6	0.16	0.91	EPA	#NULL!	#NULL!
Mining of soil and sand	Mining of soil and sand12	Discharge	Silicious dust	8	6	0.18	0.67	EPA	#NULL!	#NULL!
Mining of soil and sand	Mining of soil and sand12	Discharge	Silicious dust	8	6	0.15	0.69	EPA	#NULL!	#NULL!
Mining of soil and sand	Mining of soil and sand12	Crushing inspector	Silicious dust	8	6	0.18	0.76	EPA	#NULL!	#NULL!
Mining of soil and sand	Mining of soil and sand12	Crushing inspector	Silicious dust	8	6	0.18	0.54	EPA	#NULL!	#NULL!
Mining of soil and sand	Mining of soil and sand12	Crushing inspector	Silicious dust	8	6	0.12	0.63	EPA	#NULL!	#NULL!
Mining of soil and sand	Mining of soil and sand12	Forklift driver	Silicious dust	8	6	0.14	0.67	EPA	#NULL!	#NULL!
Mining of soil and sand	Mining of soil and sand12	Forklift driver	Silicious dust	8	6	0.12	0.54	EPA	#NULL!	#NULL!
Mining of soil and sand	Mining of soil and sand12	Forklift driver	Silicious dust	8	6	0.41	0.49	EPA	#NULL!	#NULL!
Mining of soil and sand	Mining of soil and sand12	Forklift driver	Silicious dust	8	6	0.21	0.54	EPA	#NULL!	#NULL!
Mining of soil and sand	Mining of soil and sand12	Forklift driver	Silicious dust	8	6	0.28	0.59	EPA	#NULL!	#NULL!
Mining of soil and sand	Mining of soil and sand12	Sprinkler driver	Silicious dust	8	6	0.33	0.63	EPA	#NULL!	#NULL!
Mining of soil and sand	Mining of soil and sand12	Sprinkler driver	Silicious dust	8	6	0.81	0.59	EPA	#NULL!	#NULL!
Mining of soil and sand	Mining of soil and sand12	Sprinkler driver	Silicious dust	8	6	0.26	0.51	EPA	#NULL!	#NULL!
Mining of soil and sand	Mining of soil and sand1	Rig operator	Silicious dust	8	6	0.69	0.99	Singaporean	4	0.8
Mining of soil and sand	Mining of soil and sand1	Rig operator	Silicious dust	8	6	3.71	5.3	Singaporean	5	1
Mining of soil and sand	Mining of soil and sand1	Excavator driver	Silicious dust	8	6	2.09	2.99	Singaporean	5	1
Mining of soil and sand	Mining of soil and sand1	Excavator driver	Silicious dust	8	6	0.67	0.96	Singaporean	4	0.8
Mining of soil and sand	Mining of soil and sand1	Excavator driver	Silicious dust	8	6	0.65	0.93	Singaporean	4	0.8
Mining of soil and sand	Mining of soil and sand1	Transport driver	Silicious dust	8	6	0.66	0.94	Singaporean	4	0.8
Mining of soil and sand	Mining of soil and sand1	Transport driver	Silicious dust	8	6	1.69	2.41	Singaporean	5	1
Mining of soil and sand	Mining of soil and sand1	Transport driver	Silicious dust	8	6	0.67	0.96	Singaporean	4	0.8
Mining of soil and sand	Mining of soil and sand1	Transport driver	Silicious dust	8	6	1.94	2.77	Singaporean	5	1
Mining of soil and sand	Mining of soil and sand1	Stope inspector	Silicious dust	8	6	0.67	0.96	Singaporean	4	0.8
Mining of soil and sand	Mining of soil and sand1	Discharge	Silicious dust	8	6	5.55	7.93	Singaporean	5	1
Mining of soil and sand	Mining of soil and sand1	Discharge	Silicious dust	8	6	7.51	10.73	Singaporean	5	1
Mining of soil and sand	Mining of soil and sand1	Discharge	Silicious dust	8	6	2.6	3.71	Singaporean	5	1
Mining of soil and sand	Mining of soil and sand1	Crushing inspector	Silicious dust	8	6	0.69	0.99	Singaporean	4	0.8
Mining of soil and sand	Mining of soil and sand1	Crushing inspector	Silicious dust	8	6	0.68	0.97	Singaporean	4	0.8
Mining of soil and sand	Mining of soil and sand1	Crushing inspector	Silicious dust	8	6	0.69	0.99	Singaporean	4	0.8
Mining of soil and sand	Mining of soil and sand1	Forklift driver	Silicious dust	8	6	0.67	0.96	Singaporean	4	0.8
Mining of soil and sand	Mining of soil and sand1	Sprinkler driver	Silicious dust	8	6	0.66	0.94	Singaporean	4	0.8
Mining of soil and sand	Mining of soil and sand2	Rig operator	Silicious dust	8	6	0.7	1.34	Singaporean	4	0.8
Mining of soil and sand	Mining of soil and sand2	Excavator driver	Silicious dust	8	6	0.64	0.9	Singaporean	4	0.8
Mining of soil and sand	Mining of soil and sand2	Transport driver	Silicious dust	8	6	1.5	0.97	Singaporean	4	0.8
Mining of soil and sand	Mining of soil and sand2	Transport driver	Silicious dust	8	6	0.66	0.94	Singaporean	4	0.8
Mining of soil and sand	Mining of soil and sand2	Discharge	Silicious dust	8	6	0.47	0.94	Singaporean	4	0.8
Mining of soil and sand	Mining of soil and sand2	Crushing inspector	Silicious dust	8	6	0.68	0.33	Singaporean	3	0.6
Mining of soil and sand	Mining of soil and sand2	Forklift driver	Silicious dust	8	6	0.5	0.77	Singaporean	4	0.8
Mining of soil and sand	Mining of soil and sand2	Sprinkler driver	Silicious dust	8	6	0.74	0.43	Singaporean	4	0.8
Mining of soil and sand	Mining of soil and sand3	Rig operator	Silicious dust	8	6	0.47	2.3	Singaporean	5	1
Mining of soil and sand	Mining of soil and sand3	Rig operator	Silicious dust	8	6	0.73	21.6	Singaporean	5	1
Mining of soil and sand	Mining of soil and sand3	Excavator driver	Silicious dust	8	6	1.36	2.17	Singaporean	5	1
Mining of soil and sand	Mining of soil and sand3	Excavator driver	Silicious dust	8	6	0.64	0.5	Singaporean	4	0.8
Mining of soil and sand	Mining of soil and sand3	Excavator driver	Silicious dust	8	6	0.54	0.77	Singaporean	4	0.8
Mining of soil and sand	Mining of soil and sand3	Transport driver	Silicious dust	8	6	0.77	1.07	Singaporean	4	0.8
Mining of soil and sand	Mining of soil and sand3	Transport driver	Silicious dust	8	6	0.5	1.53	Singaporean	4	0.8
Mining of soil and sand	Mining of soil and sand3	Transport driver	Silicious dust	8	6	0.6	0.93	Singaporean	4	0.8
Mining of soil and sand	Mining of soil and sand3	Stope inspector	Silicious dust	8	6	0.67	2.17	Singaporean	5	1
Mining of soil and sand	Mining of soil and sand3	Stope inspector	Silicious dust	8	6	0.58	1.2	Singaporean	4	0.8
Mining of soil and sand	Mining of soil and sand3	Discharge	Silicious dust	8	6	0.5	3.27	Singaporean	5	1
Mining of soil and sand	Mining of soil and sand3	Crushing inspector	Silicious dust	8	6	0.52	3.03	Singaporean	5	1
Mining of soil and sand	Mining of soil and sand3	Forklift driver	Silicious dust	8	6	0.6	4.23	Singaporean	5	1
Mining of soil and sand	Mining of soil and sand3	Sprinkler driver	Silicious dust	8	6	0.41	0.8	Singaporean	4	0.8
Mining of soil and sand	Mining of soil and sand4	Rig operator	Silicious dust	8	6	0.42	0.77	Singaporean	4	0.8
Mining of soil and sand	Mining of soil and sand4	Excavator driver	Silicious dust	8	6	0.42	0.3	Singaporean	3	0.6
Mining of soil and sand	Mining of soil and sand4	Transport driver	Silicious dust	8	6	0.48	0.33	Singaporean	3	0.6
Mining of soil and sand	Mining of soil and sand4	Crushing inspector	Silicious dust	8	6	0.39	0.3	Singaporean	3	0.6
Mining of soil and sand	Mining of soil and sand4	Sprinkler driver	Silicious dust	8	6	0.64	0.14	Singaporean	3	0.6
Mining of soil and sand	Mining of soil and sand5	Rig operator	Silicious dust	8	6	0.47	1.29	Singaporean	4	0.8
Mining of soil and sand	Mining of soil and sand5	Excavator driver	Silicious dust	8	6	0.48	1.29	Singaporean	4	0.8
Mining of soil and sand	Mining of soil and sand5	Excavator driver	Silicious dust	8	6	0.53	1	Singaporean	4	0.8
Mining of soil and sand	Mining of soil and sand5	Transport driver	Silicious dust	8	6	0.38	2.43	Singaporean	5	1
Mining of soil and sand	Mining of soil and sand5	Transport driver	Silicious dust	8	6	0.44	3.43	Singaporean	5	1
Mining of soil and sand	Mining of soil and sand5	Stope inspector	Silicious dust	8	6	0.47	2.19	Singaporean	5	1
Mining of soil and sand	Mining of soil and sand5	Crushing inspector	Silicious dust	8	6	0.38	3.71	Singaporean	5	1
Mining of soil and sand	Mining of soil and sand5	Crushing inspector	Silicious dust	8	6	0.34	4.71	Singaporean	5	1
Mining of soil and sand	Mining of soil and sand5	Crushing inspector	Silicious dust	8	6	0.38	4	Singaporean	5	1
Mining of soil and sand	Mining of soil and sand5	Crushing inspector	Silicious dust	8	6	0.41	1.29	Singaporean	4	0.8
Mining of soil and sand	Mining of soil and sand6	Rig operator	Silicious dust	8	6	0.44	1.29	Singaporean	4	0.8
Mining of soil and sand	Mining of soil and sand6	Excavator driver	Silicious dust	8	6	0.41	0.8	Singaporean	4	0.8
Mining of soil and sand	Mining of soil and sand6	Transport driver	Silicious dust	8	6	0.36	0.76	Singaporean	4	0.8
Mining of soil and sand	Mining of soil and sand6	Crushing inspector	Silicious dust	8	6	0.94	3.17	Singaporean	5	1
Mining of soil and sand	Mining of soil and sand7	Rig operator	Silicious dust	8	6	0.63	3.73	Singaporean	5	1
Mining of soil and sand	Mining of soil and sand7	Excavator driver	Silicious dust	8	6	0.68	1.2	Singaporean	4	0.8
Mining of soil and sand	Mining of soil and sand7	Excavator driver	Silicious dust	8	6	0.66	0.93	Singaporean	4	0.8
Mining of soil and sand	Mining of soil and sand7	Excavator driver	Silicious dust	8	6	0.66	0.7	Singaporean	4	0.8
Mining of soil and sand	Mining of soil and sand7	Transport driver	Silicious dust	8	6	0.23	1.2	Singaporean	4	0.8
Mining of soil and sand	Mining of soil and sand7	Stope inspector	Silicious dust	8	6	0.54	0.33	Singaporean	3	0.6
Mining of soil and sand	Mining of soil and sand7	Stope inspector	Silicious dust	8	6	0.3	0.33	Singaporean	3	0.6
Mining of soil and sand	Mining of soil and sand7	Discharge	Silicious dust	8	6	0.69	0.36	Singaporean	3	0.6
Mining of soil and sand	Mining of soil and sand7	Crushing inspector	Silicious dust	8	6	6.48	0.99	Singaporean	4	0.8
Mining of soil and sand	Mining of soil and sand7	Crushing inspector	Silicious dust	8	6	0.65	0.97	Singaporean	4	0.8
Mining of soil and sand	Mining of soil and sand7	Crushing inspector	Silicious dust	8	6	0.15	0.99	Singaporean	4	0.8
Mining of soil and sand	Mining of soil and sand7	Forklift driver	Silicious dust	8	6	0.23	0.96	Singaporean	4	0.8
Mining of soil and sand	Mining of soil and sand7	Sprinkler driver	Silicious dust	8	6	0.32	0.94	Singaporean	4	0.8
Mining of soil and sand	Mining of soil and sand8	Rig operator	Silicious dust	8	6	0.46	0.21	Singaporean	3	0.6
Mining of soil and sand	Mining of soil and sand8	Rig operator	Silicious dust	8	6	0.28	0.24	Singaporean	3	0.6
Mining of soil and sand	Mining of soil and sand8	Rig operator	Silicious dust	8	6	0.65	0.26	Singaporean	3	0.6
Mining of soil and sand	Mining of soil and sand8	Rig operator	Silicious dust	8	6	0.36	0.19	Singaporean	3	0.6
Mining of soil and sand	Mining of soil and sand8	Rig operator	Silicious dust	8	6	0.98	0.19	Singaporean	3	0.6
Mining of soil and sand	Mining of soil and sand8	Rig operator	Silicious dust	8	6	0.91	0.23	Singaporean	3	0.6
Mining of soil and sand	Mining of soil and sand8	Excavator driver	Silicious dust	8	6	1.27	0.2	Singaporean	3	0.6
Mining of soil and sand	Mining of soil and sand8	Excavator driver	Silicious dust	8	6	0.24	0.14	Singaporean	3	0.6
Mining of soil and sand	Mining of soil and sand8	Excavator driver	Silicious dust	8	6	0.54	0.2	Singaporean	3	0.6
Mining of soil and sand	Mining of soil and sand8	Transport driver	Silicious dust	8	6	0.21	0.2	Singaporean	3	0.6
Mining of soil and sand	Mining of soil and sand8	Transport driver	Silicious dust	8	6	0.23	0.23	Singaporean	3	0.6
Mining of soil and sand	Mining of soil and sand8	Transport driver	Silicious dust	8	6	0.21	0.2	Singaporean	3	0.6
Mining of soil and sand	Mining of soil and sand8	Transport driver	Silicious dust	8	6	0.1	0.24	Singaporean	3	0.6
Mining of soil and sand	Mining of soil and sand8	Transport driver	Silicious dust	8	6	0.9	0.24	Singaporean	3	0.6
Mining of soil and sand	Mining of soil and sand8	Transport driver	Silicious dust	8	6	0.9	0.21	Singaporean	3	0.6
Mining of soil and sand	Mining of soil and sand8	Discharge	Silicious dust	8	6	0.7	0.84	Singaporean	4	0.8
Mining of soil and sand	Mining of soil and sand8	Discharge	Silicious dust	8	6	1.7	0.63	Singaporean	4	0.8
Mining of soil and sand	Mining of soil and sand8	Discharge	Silicious dust	8	6	2.4	0.8	Singaporean	4	0.8
Mining of soil and sand	Mining of soil and sand8	Discharge	Silicious dust	8	6	1.53	0.54	Singaporean	4	0.8
Mining of soil and sand	Mining of soil and sand8	Discharge	Silicious dust	8	6	2.6	0.57	Singaporean	4	0.8
Mining of soil and sand	Mining of soil and sand8	Discharge	Silicious dust	8	6	3.3	0.64	Singaporean	4	0.8
Mining of soil and sand	Mining of soil and sand8	Crushing inspector	Silicious dust	8	6	2.8	0.19	Singaporean	3	0.6
Mining of soil and sand	Mining of soil and sand8	Crushing inspector	Silicious dust	8	6	0.9	0.23	Singaporean	3	0.6
Mining of soil and sand	Mining of soil and sand8	Crushing inspector	Silicious dust	8	6	0.9	0.26	Singaporean	3	0.6
Mining of soil and sand	Mining of soil and sand8	Crushing inspector	Silicious dust	8	6	0.56	0.21	Singaporean	3	0.6
Mining of soil and sand	Mining of soil and sand8	Crushing inspector	Silicious dust	8	6	0.53	0.26	Singaporean	3	0.6
Mining of soil and sand	Mining of soil and sand8	Crushing inspector	Silicious dust	8	6	2.22	0.26	Singaporean	3	0.6
Mining of soil and sand	Mining of soil and sand8	Forklift driver	Silicious dust	8	6	1.12	0.17	Singaporean	3	0.6
Mining of soil and sand	Mining of soil and sand8	Forklift driver	Silicious dust	8	6	0.36	0.2	Singaporean	3	0.6
Mining of soil and sand	Mining of soil and sand8	Forklift driver	Silicious dust	8	6	0.28	0.17	Singaporean	3	0.6
Mining of soil and sand	Mining of soil and sand9	Rig operator	Silicious dust	8	6	0.21	0.59	Singaporean	4	0.8
Mining of soil and sand	Mining of soil and sand9	Excavator driver	Silicious dust	8	6	0.36	0.3	Singaporean	3	0.6
Mining of soil and sand	Mining of soil and sand9	Transport driver	Silicious dust	8	6	0.1	0.4	Singaporean	3	0.6
Mining of soil and sand	Mining of soil and sand9	Crushing inspector	Silicious dust	8	6	0.1	0.47	Singaporean	4	0.8
Mining of soil and sand	Mining of soil and sand9	Forklift driver	Silicious dust	8	6	0.1	1.16	Singaporean	4	0.8
Mining of soil and sand	Mining of soil and sand9	Sprinkler driver	Silicious dust	8	6	0.69	0.37	Singaporean	3	0.6
Mining of soil and sand	Mining of soil and sand10	Rig operator	Silicious dust	8	6	0.68	1	Singaporean	4	0.8
Mining of soil and sand	Mining of soil and sand10	Excavator driver	Silicious dust	8	6	0.69	0.91	Singaporean	4	0.8
Mining of soil and sand	Mining of soil and sand10	Transport driver	Silicious dust	8	6	0.67	2.14	Singaporean	5	1
Mining of soil and sand	Mining of soil and sand10	Stope inspector	Silicious dust	8	6	0.66	0.94	Singaporean	4	0.8
Mining of soil and sand	Mining of soil and sand10	Crushing inspector	Silicious dust	8	6	0.15	0.67	Singaporean	4	0.8
Mining of soil and sand	Mining of soil and sand10	Forklift driver	Silicious dust	8	6	0.17	0.97	Singaporean	4	0.8
Mining of soil and sand	Mining of soil and sand10	Sprinkler driver	Silicious dust	8	6	0.18	0.71	Singaporean	4	0.8
Mining of soil and sand	Mining of soil and sand11	Rig operator	Silicious dust	8	6	0.13	1.06	Singaporean	4	0.8
Mining of soil and sand	Mining of soil and sand11	Rig operator	Silicious dust	8	6	0.13	0.67	Singaporean	4	0.8
Mining of soil and sand	Mining of soil and sand11	Excavator driver	Silicious dust	8	6	0.16	1.04	Singaporean	4	0.8
Mining of soil and sand	Mining of soil and sand11	Transport driver	Silicious dust	8	6	0.14	1.94	Singaporean	5	1
Mining of soil and sand	Mining of soil and sand11	Stope inspector	Silicious dust	8	6	0.1	0.91	Singaporean	4	0.8
Mining of soil and sand	Mining of soil and sand11	Crushing inspector	Silicious dust	8	6	0.14	0.77	Singaporean	4	0.8
Mining of soil and sand	Mining of soil and sand11	Forklift driver	Silicious dust	8	6	0.14	1.1	Singaporean	4	0.8
Mining of soil and sand	Mining of soil and sand11	Sprinkler driver	Silicious dust	8	6	0.16	0.71	Singaporean	4	0.8
Mining of soil and sand	Mining of soil and sand12	Excavator driver	Silicious dust	8	6	0.14	0.86	Singaporean	4	0.8
Mining of soil and sand	Mining of soil and sand12	Excavator driver	Silicious dust	8	6	0.17	0.96	Singaporean	4	0.8
Mining of soil and sand	Mining of soil and sand12	Excavator driver	Silicious dust	8	6	0.17	0.83	Singaporean	4	0.8
Mining of soil and sand	Mining of soil and sand12	Excavator driver	Silicious dust	8	6	0.15	0.71	Singaporean	4	0.8
Mining of soil and sand	Mining of soil and sand12	Excavator driver	Silicious dust	8	6	0.59	0.74	Singaporean	4	0.8
Mining of soil and sand	Mining of soil and sand12	Excavator driver	Silicious dust	8	6	0.44	0.86	Singaporean	4	0.8
Mining of soil and sand	Mining of soil and sand12	Transport driver	Silicious dust	8	6	0.56	0.59	Singaporean	4	0.8
Mining of soil and sand	Mining of soil and sand12	Transport driver	Silicious dust	8	6	0.38	0.6	Singaporean	4	0.8
Mining of soil and sand	Mining of soil and sand12	Stope inspector	Silicious dust	8	6	0.4	0.6	Singaporean	4	0.8
Mining of soil and sand	Mining of soil and sand12	Stope inspector	Silicious dust	8	6	0.45	0.69	Singaporean	4	0.8
Mining of soil and sand	Mining of soil and sand12	Stope inspector	Silicious dust	8	6	0.13	0.56	Singaporean	4	0.8
Mining of soil and sand	Mining of soil and sand12	Discharge	Silicious dust	8	6	0.16	0.91	Singaporean	4	0.8
Mining of soil and sand	Mining of soil and sand12	Discharge	Silicious dust	8	6	0.18	0.67	Singaporean	4	0.8
Mining of soil and sand	Mining of soil and sand12	Discharge	Silicious dust	8	6	0.15	0.69	Singaporean	4	0.8
Mining of soil and sand	Mining of soil and sand12	Crushing inspector	Silicious dust	8	6	0.18	0.76	Singaporean	4	0.8
Mining of soil and sand	Mining of soil and sand12	Crushing inspector	Silicious dust	8	6	0.18	0.54	Singaporean	4	0.8
Mining of soil and sand	Mining of soil and sand12	Crushing inspector	Silicious dust	8	6	0.12	0.63	Singaporean	4	0.8
Mining of soil and sand	Mining of soil and sand12	Forklift driver	Silicious dust	8	6	0.14	0.67	Singaporean	4	0.8
Mining of soil and sand	Mining of soil and sand12	Forklift driver	Silicious dust	8	6	0.12	0.54	Singaporean	4	0.8
Mining of soil and sand	Mining of soil and sand12	Forklift driver	Silicious dust	8	6	0.41	0.49	Singaporean	4	0.8
Mining of soil and sand	Mining of soil and sand12	Forklift driver	Silicious dust	8	6	0.21	0.54	Singaporean	4	0.8
Mining of soil and sand	Mining of soil and sand12	Forklift driver	Silicious dust	8	6	0.28	0.59	Singaporean	4	0.8
Mining of soil and sand	Mining of soil and sand12	Sprinkler driver	Silicious dust	8	6	0.33	0.63	Singaporean	4	0.8
Mining of soil and sand	Mining of soil and sand12	Sprinkler driver	Silicious dust	8	6	0.81	0.59	Singaporean	4	0.8
Mining of soil and sand	Mining of soil and sand12	Sprinkler driver	Silicious dust	8	6	0.26	0.51	Singaporean	4	0.8
Mining of soil and sand	Mining of soil and sand1	Rig operator	Silicious dust	8	6	0.69	0.99	COSHH	5	1
Mining of soil and sand	Mining of soil and sand1	Rig operator	Silicious dust	8	6	3.71	5.3	COSHH	5	1
Mining of soil and sand	Mining of soil and sand1	Excavator driver	Silicious dust	8	6	2.09	2.99	COSHH	5	1
Mining of soil and sand	Mining of soil and sand1	Excavator driver	Silicious dust	8	6	0.67	0.96	COSHH	5	1
Mining of soil and sand	Mining of soil and sand1	Excavator driver	Silicious dust	8	6	0.65	0.93	COSHH	5	1
Mining of soil and sand	Mining of soil and sand1	Transport driver	Silicious dust	8	6	0.66	0.94	COSHH	5	1
Mining of soil and sand	Mining of soil and sand1	Transport driver	Silicious dust	8	6	1.69	2.41	COSHH	5	1
Mining of soil and sand	Mining of soil and sand1	Transport driver	Silicious dust	8	6	0.67	0.96	COSHH	5	1
Mining of soil and sand	Mining of soil and sand1	Transport driver	Silicious dust	8	6	1.94	2.77	COSHH	5	1
Mining of soil and sand	Mining of soil and sand1	Stope inspector	Silicious dust	8	6	0.67	0.96	COSHH	5	1
Mining of soil and sand	Mining of soil and sand1	Discharge	Silicious dust	8	6	5.55	7.93	COSHH	5	1
Mining of soil and sand	Mining of soil and sand1	Discharge	Silicious dust	8	6	7.51	10.73	COSHH	5	1
Mining of soil and sand	Mining of soil and sand1	Discharge	Silicious dust	8	6	2.6	3.71	COSHH	5	1
Mining of soil and sand	Mining of soil and sand1	Crushing inspector	Silicious dust	8	6	0.69	0.99	COSHH	5	1
Mining of soil and sand	Mining of soil and sand1	Crushing inspector	Silicious dust	8	6	0.68	0.97	COSHH	5	1
Mining of soil and sand	Mining of soil and sand1	Crushing inspector	Silicious dust	8	6	0.69	0.99	COSHH	5	1
Mining of soil and sand	Mining of soil and sand1	Forklift driver	Silicious dust	8	6	0.67	0.96	COSHH	5	1
Mining of soil and sand	Mining of soil and sand1	Sprinkler driver	Silicious dust	8	6	0.66	0.94	COSHH	5	1
Mining of soil and sand	Mining of soil and sand2	Rig operator	Silicious dust	8	6	0.7	1.34	COSHH	5	1
Mining of soil and sand	Mining of soil and sand2	Excavator driver	Silicious dust	8	6	0.64	0.9	COSHH	5	1
Mining of soil and sand	Mining of soil and sand2	Transport driver	Silicious dust	8	6	1.5	0.97	COSHH	5	1
Mining of soil and sand	Mining of soil and sand2	Transport driver	Silicious dust	8	6	0.66	0.94	COSHH	5	1
Mining of soil and sand	Mining of soil and sand2	Discharge	Silicious dust	8	6	0.47	0.94	COSHH	5	1
Mining of soil and sand	Mining of soil and sand2	Crushing inspector	Silicious dust	8	6	0.68	0.33	COSHH	5	1
Mining of soil and sand	Mining of soil and sand2	Forklift driver	Silicious dust	8	6	0.5	0.77	COSHH	5	1
Mining of soil and sand	Mining of soil and sand2	Sprinkler driver	Silicious dust	8	6	0.74	0.43	COSHH	5	1
Mining of soil and sand	Mining of soil and sand3	Rig operator	Silicious dust	8	6	0.47	2.3	COSHH	5	1
Mining of soil and sand	Mining of soil and sand3	Rig operator	Silicious dust	8	6	0.73	21.6	COSHH	5	1
Mining of soil and sand	Mining of soil and sand3	Excavator driver	Silicious dust	8	6	1.36	2.17	COSHH	5	1
Mining of soil and sand	Mining of soil and sand3	Excavator driver	Silicious dust	8	6	0.64	0.5	COSHH	5	1
Mining of soil and sand	Mining of soil and sand3	Excavator driver	Silicious dust	8	6	0.54	0.77	COSHH	5	1
Mining of soil and sand	Mining of soil and sand3	Transport driver	Silicious dust	8	6	0.77	1.07	COSHH	5	1
Mining of soil and sand	Mining of soil and sand3	Transport driver	Silicious dust	8	6	0.5	1.53	COSHH	5	1
Mining of soil and sand	Mining of soil and sand3	Transport driver	Silicious dust	8	6	0.6	0.93	COSHH	5	1
Mining of soil and sand	Mining of soil and sand3	Stope inspector	Silicious dust	8	6	0.67	2.17	COSHH	5	1
Mining of soil and sand	Mining of soil and sand3	Stope inspector	Silicious dust	8	6	0.58	1.2	COSHH	5	1
Mining of soil and sand	Mining of soil and sand3	Discharge	Silicious dust	8	6	0.5	3.27	COSHH	5	1
Mining of soil and sand	Mining of soil and sand3	Crushing inspector	Silicious dust	8	6	0.52	3.03	COSHH	5	1
Mining of soil and sand	Mining of soil and sand3	Forklift driver	Silicious dust	8	6	0.6	4.23	COSHH	5	1
Mining of soil and sand	Mining of soil and sand3	Sprinkler driver	Silicious dust	8	6	0.41	0.8	COSHH	5	1
Mining of soil and sand	Mining of soil and sand4	Rig operator	Silicious dust	8	6	0.42	0.77	COSHH	5	1
Mining of soil and sand	Mining of soil and sand4	Excavator driver	Silicious dust	8	6	0.42	0.3	COSHH	5	1
Mining of soil and sand	Mining of soil and sand4	Transport driver	Silicious dust	8	6	0.48	0.33	COSHH	5	1
Mining of soil and sand	Mining of soil and sand4	Crushing inspector	Silicious dust	8	6	0.39	0.3	COSHH	5	1
Mining of soil and sand	Mining of soil and sand4	Sprinkler driver	Silicious dust	8	6	0.64	0.14	COSHH	5	1
Mining of soil and sand	Mining of soil and sand5	Rig operator	Silicious dust	8	6	0.47	1.29	COSHH	5	1
Mining of soil and sand	Mining of soil and sand5	Excavator driver	Silicious dust	8	6	0.48	1.29	COSHH	5	1
Mining of soil and sand	Mining of soil and sand5	Excavator driver	Silicious dust	8	6	0.53	1	COSHH	5	1
Mining of soil and sand	Mining of soil and sand5	Transport driver	Silicious dust	8	6	0.38	2.43	COSHH	5	1
Mining of soil and sand	Mining of soil and sand5	Transport driver	Silicious dust	8	6	0.44	3.43	COSHH	5	1
Mining of soil and sand	Mining of soil and sand5	Stope inspector	Silicious dust	8	6	0.47	2.19	COSHH	5	1
Mining of soil and sand	Mining of soil and sand5	Crushing inspector	Silicious dust	8	6	0.38	3.71	COSHH	5	1
Mining of soil and sand	Mining of soil and sand5	Crushing inspector	Silicious dust	8	6	0.34	4.71	COSHH	5	1
Mining of soil and sand	Mining of soil and sand5	Crushing inspector	Silicious dust	8	6	0.38	4	COSHH	5	1
Mining of soil and sand	Mining of soil and sand5	Crushing inspector	Silicious dust	8	6	0.41	1.29	COSHH	5	1
Mining of soil and sand	Mining of soil and sand6	Rig operator	Silicious dust	8	6	0.44	1.29	COSHH	5	1
Mining of soil and sand	Mining of soil and sand6	Excavator driver	Silicious dust	8	6	0.41	0.8	COSHH	5	1
Mining of soil and sand	Mining of soil and sand6	Transport driver	Silicious dust	8	6	0.36	0.76	COSHH	5	1
Mining of soil and sand	Mining of soil and sand6	Crushing inspector	Silicious dust	8	6	0.94	3.17	COSHH	5	1
Mining of soil and sand	Mining of soil and sand7	Rig operator	Silicious dust	8	6	0.63	3.73	COSHH	5	1
Mining of soil and sand	Mining of soil and sand7	Excavator driver	Silicious dust	8	6	0.68	1.2	COSHH	5	1
Mining of soil and sand	Mining of soil and sand7	Excavator driver	Silicious dust	8	6	0.66	0.93	COSHH	5	1
Mining of soil and sand	Mining of soil and sand7	Excavator driver	Silicious dust	8	6	0.66	0.7	COSHH	5	1
Mining of soil and sand	Mining of soil and sand7	Transport driver	Silicious dust	8	6	0.23	1.2	COSHH	5	1
Mining of soil and sand	Mining of soil and sand7	Stope inspector	Silicious dust	8	6	0.54	0.33	COSHH	5	1
Mining of soil and sand	Mining of soil and sand7	Stope inspector	Silicious dust	8	6	0.3	0.33	COSHH	5	1
Mining of soil and sand	Mining of soil and sand7	Discharge	Silicious dust	8	6	0.69	0.36	COSHH	5	1
Mining of soil and sand	Mining of soil and sand7	Crushing inspector	Silicious dust	8	6	6.48	0.99	COSHH	5	1
Mining of soil and sand	Mining of soil and sand7	Crushing inspector	Silicious dust	8	6	0.65	0.97	COSHH	5	1
Mining of soil and sand	Mining of soil and sand7	Crushing inspector	Silicious dust	8	6	0.15	0.99	COSHH	5	1
Mining of soil and sand	Mining of soil and sand7	Forklift driver	Silicious dust	8	6	0.23	0.96	COSHH	5	1
Mining of soil and sand	Mining of soil and sand7	Sprinkler driver	Silicious dust	8	6	0.32	0.94	COSHH	5	1
Mining of soil and sand	Mining of soil and sand8	Rig operator	Silicious dust	8	6	0.46	0.21	COSHH	5	1
Mining of soil and sand	Mining of soil and sand8	Rig operator	Silicious dust	8	6	0.28	0.24	COSHH	5	1
Mining of soil and sand	Mining of soil and sand8	Rig operator	Silicious dust	8	6	0.65	0.26	COSHH	5	1
Mining of soil and sand	Mining of soil and sand8	Rig operator	Silicious dust	8	6	0.36	0.19	COSHH	5	1
Mining of soil and sand	Mining of soil and sand8	Rig operator	Silicious dust	8	6	0.98	0.19	COSHH	5	1
Mining of soil and sand	Mining of soil and sand8	Rig operator	Silicious dust	8	6	0.91	0.23	COSHH	5	1
Mining of soil and sand	Mining of soil and sand8	Excavator driver	Silicious dust	8	6	1.27	0.2	COSHH	5	1
Mining of soil and sand	Mining of soil and sand8	Excavator driver	Silicious dust	8	6	0.24	0.14	COSHH	5	1
Mining of soil and sand	Mining of soil and sand8	Excavator driver	Silicious dust	8	6	0.54	0.2	COSHH	5	1
Mining of soil and sand	Mining of soil and sand8	Transport driver	Silicious dust	8	6	0.21	0.2	COSHH	5	1
Mining of soil and sand	Mining of soil and sand8	Transport driver	Silicious dust	8	6	0.23	0.23	COSHH	5	1
Mining of soil and sand	Mining of soil and sand8	Transport driver	Silicious dust	8	6	0.21	0.2	COSHH	5	1
Mining of soil and sand	Mining of soil and sand8	Transport driver	Silicious dust	8	6	0.1	0.24	COSHH	5	1
Mining of soil and sand	Mining of soil and sand8	Transport driver	Silicious dust	8	6	0.9	0.24	COSHH	5	1
Mining of soil and sand	Mining of soil and sand8	Transport driver	Silicious dust	8	6	0.9	0.21	COSHH	5	1
Mining of soil and sand	Mining of soil and sand8	Discharge	Silicious dust	8	6	0.7	0.84	COSHH	5	1
Mining of soil and sand	Mining of soil and sand8	Discharge	Silicious dust	8	6	1.7	0.63	COSHH	5	1
Mining of soil and sand	Mining of soil and sand8	Discharge	Silicious dust	8	6	2.4	0.8	COSHH	5	1
Mining of soil and sand	Mining of soil and sand8	Discharge	Silicious dust	8	6	1.53	0.54	COSHH	5	1
Mining of soil and sand	Mining of soil and sand8	Discharge	Silicious dust	8	6	2.6	0.57	COSHH	5	1
Mining of soil and sand	Mining of soil and sand8	Discharge	Silicious dust	8	6	3.3	0.64	COSHH	5	1
Mining of soil and sand	Mining of soil and sand8	Crushing inspector	Silicious dust	8	6	2.8	0.19	COSHH	5	1
Mining of soil and sand	Mining of soil and sand8	Crushing inspector	Silicious dust	8	6	0.9	0.23	COSHH	5	1
Mining of soil and sand	Mining of soil and sand8	Crushing inspector	Silicious dust	8	6	0.9	0.26	COSHH	5	1
Mining of soil and sand	Mining of soil and sand8	Crushing inspector	Silicious dust	8	6	0.56	0.21	COSHH	5	1
Mining of soil and sand	Mining of soil and sand8	Crushing inspector	Silicious dust	8	6	0.53	0.26	COSHH	5	1
Mining of soil and sand	Mining of soil and sand8	Crushing inspector	Silicious dust	8	6	2.22	0.26	COSHH	5	1
Mining of soil and sand	Mining of soil and sand8	Forklift driver	Silicious dust	8	6	1.12	0.17	COSHH	5	1
Mining of soil and sand	Mining of soil and sand8	Forklift driver	Silicious dust	8	6	0.36	0.2	COSHH	5	1
Mining of soil and sand	Mining of soil and sand8	Forklift driver	Silicious dust	8	6	0.28	0.17	COSHH	5	1
Mining of soil and sand	Mining of soil and sand9	Rig operator	Silicious dust	8	6	0.21	0.59	COSHH	5	1
Mining of soil and sand	Mining of soil and sand9	Excavator driver	Silicious dust	8	6	0.36	0.3	COSHH	5	1
Mining of soil and sand	Mining of soil and sand9	Transport driver	Silicious dust	8	6	0.1	0.4	COSHH	5	1
Mining of soil and sand	Mining of soil and sand9	Crushing inspector	Silicious dust	8	6	0.1	0.47	COSHH	5	1
Mining of soil and sand	Mining of soil and sand9	Forklift driver	Silicious dust	8	6	0.1	1.16	COSHH	5	1
Mining of soil and sand	Mining of soil and sand9	Sprinkler driver	Silicious dust	8	6	0.69	0.37	COSHH	5	1
Mining of soil and sand	Mining of soil and sand10	Rig operator	Silicious dust	8	6	0.68	1	COSHH	5	1
Mining of soil and sand	Mining of soil and sand10	Excavator driver	Silicious dust	8	6	0.69	0.91	COSHH	5	1
Mining of soil and sand	Mining of soil and sand10	Transport driver	Silicious dust	8	6	0.67	2.14	COSHH	5	1
Mining of soil and sand	Mining of soil and sand10	Stope inspector	Silicious dust	8	6	0.66	0.94	COSHH	5	1
Mining of soil and sand	Mining of soil and sand10	Crushing inspector	Silicious dust	8	6	0.15	0.67	COSHH	5	1
Mining of soil and sand	Mining of soil and sand10	Forklift driver	Silicious dust	8	6	0.17	0.97	COSHH	5	1
Mining of soil and sand	Mining of soil and sand10	Sprinkler driver	Silicious dust	8	6	0.18	0.71	COSHH	5	1
Mining of soil and sand	Mining of soil and sand11	Rig operator	Silicious dust	8	6	0.13	1.06	COSHH	5	1
Mining of soil and sand	Mining of soil and sand11	Rig operator	Silicious dust	8	6	0.13	0.67	COSHH	5	1
Mining of soil and sand	Mining of soil and sand11	Excavator driver	Silicious dust	8	6	0.16	1.04	COSHH	5	1
Mining of soil and sand	Mining of soil and sand11	Transport driver	Silicious dust	8	6	0.14	1.94	COSHH	5	1
Mining of soil and sand	Mining of soil and sand11	Stope inspector	Silicious dust	8	6	0.1	0.91	COSHH	5	1
Mining of soil and sand	Mining of soil and sand11	Crushing inspector	Silicious dust	8	6	0.14	0.77	COSHH	5	1
Mining of soil and sand	Mining of soil and sand11	Forklift driver	Silicious dust	8	6	0.14	1.1	COSHH	5	1
Mining of soil and sand	Mining of soil and sand11	Sprinkler driver	Silicious dust	8	6	0.16	0.71	COSHH	5	1
Mining of soil and sand	Mining of soil and sand12	Excavator driver	Silicious dust	8	6	0.14	0.86	COSHH	5	1
Mining of soil and sand	Mining of soil and sand12	Excavator driver	Silicious dust	8	6	0.17	0.96	COSHH	5	1
Mining of soil and sand	Mining of soil and sand12	Excavator driver	Silicious dust	8	6	0.17	0.83	COSHH	5	1
Mining of soil and sand	Mining of soil and sand12	Excavator driver	Silicious dust	8	6	0.15	0.71	COSHH	5	1
Mining of soil and sand	Mining of soil and sand12	Excavator driver	Silicious dust	8	6	0.59	0.74	COSHH	5	1
Mining of soil and sand	Mining of soil and sand12	Excavator driver	Silicious dust	8	6	0.44	0.86	COSHH	5	1
Mining of soil and sand	Mining of soil and sand12	Transport driver	Silicious dust	8	6	0.56	0.59	COSHH	5	1
Mining of soil and sand	Mining of soil and sand12	Transport driver	Silicious dust	8	6	0.38	0.6	COSHH	5	1
Mining of soil and sand	Mining of soil and sand12	Stope inspector	Silicious dust	8	6	0.4	0.6	COSHH	5	1
Mining of soil and sand	Mining of soil and sand12	Stope inspector	Silicious dust	8	6	0.45	0.69	COSHH	5	1
Mining of soil and sand	Mining of soil and sand12	Stope inspector	Silicious dust	8	6	0.13	0.56	COSHH	5	1
Mining of soil and sand	Mining of soil and sand12	Discharge	Silicious dust	8	6	0.16	0.91	COSHH	5	1
Mining of soil and sand	Mining of soil and sand12	Discharge	Silicious dust	8	6	0.18	0.67	COSHH	5	1
Mining of soil and sand	Mining of soil and sand12	Discharge	Silicious dust	8	6	0.15	0.69	COSHH	5	1
Mining of soil and sand	Mining of soil and sand12	Crushing inspector	Silicious dust	8	6	0.18	0.76	COSHH	5	1
Mining of soil and sand	Mining of soil and sand12	Crushing inspector	Silicious dust	8	6	0.18	0.54	COSHH	5	1
Mining of soil and sand	Mining of soil and sand12	Crushing inspector	Silicious dust	8	6	0.12	0.63	COSHH	5	1
Mining of soil and sand	Mining of soil and sand12	Forklift driver	Silicious dust	8	6	0.14	0.67	COSHH	5	1
Mining of soil and sand	Mining of soil and sand12	Forklift driver	Silicious dust	8	6	0.12	0.54	COSHH	5	1
Mining of soil and sand	Mining of soil and sand12	Forklift driver	Silicious dust	8	6	0.41	0.49	COSHH	5	1
Mining of soil and sand	Mining of soil and sand12	Forklift driver	Silicious dust	8	6	0.21	0.54	COSHH	5	1
Mining of soil and sand	Mining of soil and sand12	Forklift driver	Silicious dust	8	6	0.28	0.59	COSHH	5	1
Mining of soil and sand	Mining of soil and sand12	Sprinkler driver	Silicious dust	8	6	0.33	0.63	COSHH	5	1
Mining of soil and sand	Mining of soil and sand12	Sprinkler driver	Silicious dust	8	6	0.81	0.59	COSHH	5	1
Mining of soil and sand	Mining of soil and sand12	Sprinkler driver	Silicious dust	8	6	0.26	0.51	COSHH	5	1
Mining of soil and sand	Mining of soil and sand1	Rig operator	Silicious dust	8	6	0.69	0.99	Romanian	3	0.4
Mining of soil and sand	Mining of soil and sand1	Rig operator	Silicious dust	8	6	3.71	5.3	Romanian	4	0.6
Mining of soil and sand	Mining of soil and sand1	Excavator driver	Silicious dust	8	6	2.09	2.99	Romanian	4	0.6
Mining of soil and sand	Mining of soil and sand1	Excavator driver	Silicious dust	8	6	0.67	0.96	Romanian	3	0.4
Mining of soil and sand	Mining of soil and sand1	Excavator driver	Silicious dust	8	6	0.65	0.93	Romanian	3	0.4
Mining of soil and sand	Mining of soil and sand1	Transport driver	Silicious dust	8	6	0.66	0.94	Romanian	3	0.4
Mining of soil and sand	Mining of soil and sand1	Transport driver	Silicious dust	8	6	1.69	2.41	Romanian	4	0.6
Mining of soil and sand	Mining of soil and sand1	Transport driver	Silicious dust	8	6	0.67	0.96	Romanian	3	0.4
Mining of soil and sand	Mining of soil and sand1	Transport driver	Silicious dust	8	6	1.94	2.77	Romanian	4	0.6
Mining of soil and sand	Mining of soil and sand1	Stope inspector	Silicious dust	8	6	0.67	0.96	Romanian	3	0.4
Mining of soil and sand	Mining of soil and sand1	Discharge	Silicious dust	8	6	5.55	7.93	Romanian	4	0.6
Mining of soil and sand	Mining of soil and sand1	Discharge	Silicious dust	8	6	7.51	10.73	Romanian	5	0.7
Mining of soil and sand	Mining of soil and sand1	Discharge	Silicious dust	8	6	2.6	3.71	Romanian	4	0.6
Mining of soil and sand	Mining of soil and sand1	Crushing inspector	Silicious dust	8	6	0.69	0.99	Romanian	3	0.4
Mining of soil and sand	Mining of soil and sand1	Crushing inspector	Silicious dust	8	6	0.68	0.97	Romanian	3	0.4
Mining of soil and sand	Mining of soil and sand1	Crushing inspector	Silicious dust	8	6	0.69	0.99	Romanian	3	0.4
Mining of soil and sand	Mining of soil and sand1	Forklift driver	Silicious dust	8	6	0.67	0.96	Romanian	3	0.4
Mining of soil and sand	Mining of soil and sand1	Sprinkler driver	Silicious dust	8	6	0.66	0.94	Romanian	3	0.4
Mining of soil and sand	Mining of soil and sand2	Rig operator	Silicious dust	8	6	0.7	1.34	Romanian	4	0.6
Mining of soil and sand	Mining of soil and sand2	Excavator driver	Silicious dust	8	6	0.64	0.9	Romanian	3	0.4
Mining of soil and sand	Mining of soil and sand2	Transport driver	Silicious dust	8	6	1.5	0.97	Romanian	3	0.4
Mining of soil and sand	Mining of soil and sand2	Transport driver	Silicious dust	8	6	0.66	0.94	Romanian	3	0.4
Mining of soil and sand	Mining of soil and sand2	Discharge	Silicious dust	8	6	0.47	0.94	Romanian	3	0.4
Mining of soil and sand	Mining of soil and sand2	Crushing inspector	Silicious dust	8	6	0.68	0.33	Romanian	3	0.4
Mining of soil and sand	Mining of soil and sand2	Forklift driver	Silicious dust	8	6	0.5	0.77	Romanian	3	0.4
Mining of soil and sand	Mining of soil and sand2	Sprinkler driver	Silicious dust	8	6	0.74	0.43	Romanian	3	0.4
Mining of soil and sand	Mining of soil and sand3	Rig operator	Silicious dust	8	6	0.47	2.3	Romanian	4	0.6
Mining of soil and sand	Mining of soil and sand3	Rig operator	Silicious dust	8	6	0.73	21.6	Romanian	5	0.7
Mining of soil and sand	Mining of soil and sand3	Excavator driver	Silicious dust	8	6	1.36	2.17	Romanian	4	0.6
Mining of soil and sand	Mining of soil and sand3	Excavator driver	Silicious dust	8	6	0.64	0.5	Romanian	3	0.4
Mining of soil and sand	Mining of soil and sand3	Excavator driver	Silicious dust	8	6	0.54	0.77	Romanian	3	0.4
Mining of soil and sand	Mining of soil and sand3	Transport driver	Silicious dust	8	6	0.77	1.07	Romanian	4	0.6
Mining of soil and sand	Mining of soil and sand3	Transport driver	Silicious dust	8	6	0.5	1.53	Romanian	4	0.6
Mining of soil and sand	Mining of soil and sand3	Transport driver	Silicious dust	8	6	0.6	0.93	Romanian	3	0.4
Mining of soil and sand	Mining of soil and sand3	Stope inspector	Silicious dust	8	6	0.67	2.17	Romanian	4	0.6
Mining of soil and sand	Mining of soil and sand3	Stope inspector	Silicious dust	8	6	0.58	1.2	Romanian	4	0.6
Mining of soil and sand	Mining of soil and sand3	Discharge	Silicious dust	8	6	0.5	3.27	Romanian	4	0.6
Mining of soil and sand	Mining of soil and sand3	Crushing inspector	Silicious dust	8	6	0.52	3.03	Romanian	4	0.6
Mining of soil and sand	Mining of soil and sand3	Forklift driver	Silicious dust	8	6	0.6	4.23	Romanian	4	0.6
Mining of soil and sand	Mining of soil and sand3	Sprinkler driver	Silicious dust	8	6	0.41	0.8	Romanian	3	0.4
Mining of soil and sand	Mining of soil and sand4	Rig operator	Silicious dust	8	6	0.42	0.77	Romanian	3	0.4
Mining of soil and sand	Mining of soil and sand4	Excavator driver	Silicious dust	8	6	0.42	0.3	Romanian	3	0.4
Mining of soil and sand	Mining of soil and sand4	Transport driver	Silicious dust	8	6	0.48	0.33	Romanian	3	0.4
Mining of soil and sand	Mining of soil and sand4	Crushing inspector	Silicious dust	8	6	0.39	0.3	Romanian	3	0.4
Mining of soil and sand	Mining of soil and sand4	Sprinkler driver	Silicious dust	8	6	0.64	0.14	Romanian	3	0.4
Mining of soil and sand	Mining of soil and sand5	Rig operator	Silicious dust	8	6	0.47	1.29	Romanian	4	0.6
Mining of soil and sand	Mining of soil and sand5	Excavator driver	Silicious dust	8	6	0.48	1.29	Romanian	4	0.6
Mining of soil and sand	Mining of soil and sand5	Excavator driver	Silicious dust	8	6	0.53	1	Romanian	4	0.6
Mining of soil and sand	Mining of soil and sand5	Transport driver	Silicious dust	8	6	0.38	2.43	Romanian	4	0.6
Mining of soil and sand	Mining of soil and sand5	Transport driver	Silicious dust	8	6	0.44	3.43	Romanian	4	0.6
Mining of soil and sand	Mining of soil and sand5	Stope inspector	Silicious dust	8	6	0.47	2.19	Romanian	4	0.6
Mining of soil and sand	Mining of soil and sand5	Crushing inspector	Silicious dust	8	6	0.38	3.71	Romanian	4	0.6
Mining of soil and sand	Mining of soil and sand5	Crushing inspector	Silicious dust	8	6	0.34	4.71	Romanian	4	0.6
Mining of soil and sand	Mining of soil and sand5	Crushing inspector	Silicious dust	8	6	0.38	4	Romanian	4	0.6
Mining of soil and sand	Mining of soil and sand5	Crushing inspector	Silicious dust	8	6	0.41	1.29	Romanian	4	0.6
Mining of soil and sand	Mining of soil and sand6	Rig operator	Silicious dust	8	6	0.44	1.29	Romanian	4	0.6
Mining of soil and sand	Mining of soil and sand6	Excavator driver	Silicious dust	8	6	0.41	0.8	Romanian	3	0.4
Mining of soil and sand	Mining of soil and sand6	Transport driver	Silicious dust	8	6	0.36	0.76	Romanian	3	0.4
Mining of soil and sand	Mining of soil and sand6	Crushing inspector	Silicious dust	8	6	0.94	3.17	Romanian	4	0.6
Mining of soil and sand	Mining of soil and sand7	Rig operator	Silicious dust	8	6	0.63	3.73	Romanian	4	0.6
Mining of soil and sand	Mining of soil and sand7	Excavator driver	Silicious dust	8	6	0.68	1.2	Romanian	4	0.6
Mining of soil and sand	Mining of soil and sand7	Excavator driver	Silicious dust	8	6	0.66	0.93	Romanian	3	0.4
Mining of soil and sand	Mining of soil and sand7	Excavator driver	Silicious dust	8	6	0.66	0.7	Romanian	3	0.4
Mining of soil and sand	Mining of soil and sand7	Transport driver	Silicious dust	8	6	0.23	1.2	Romanian	4	0.6
Mining of soil and sand	Mining of soil and sand7	Stope inspector	Silicious dust	8	6	0.54	0.33	Romanian	3	0.4
Mining of soil and sand	Mining of soil and sand7	Stope inspector	Silicious dust	8	6	0.3	0.33	Romanian	3	0.4
Mining of soil and sand	Mining of soil and sand7	Discharge	Silicious dust	8	6	0.69	0.36	Romanian	3	0.4
Mining of soil and sand	Mining of soil and sand7	Crushing inspector	Silicious dust	8	6	6.48	0.99	Romanian	3	0.4
Mining of soil and sand	Mining of soil and sand7	Crushing inspector	Silicious dust	8	6	0.65	0.97	Romanian	3	0.4
Mining of soil and sand	Mining of soil and sand7	Crushing inspector	Silicious dust	8	6	0.15	0.99	Romanian	3	0.4
Mining of soil and sand	Mining of soil and sand7	Forklift driver	Silicious dust	8	6	0.23	0.96	Romanian	3	0.4
Mining of soil and sand	Mining of soil and sand7	Sprinkler driver	Silicious dust	8	6	0.32	0.94	Romanian	3	0.4
Mining of soil and sand	Mining of soil and sand8	Rig operator	Silicious dust	8	6	0.46	0.21	Romanian	3	0.4
Mining of soil and sand	Mining of soil and sand8	Rig operator	Silicious dust	8	6	0.28	0.24	Romanian	3	0.4
Mining of soil and sand	Mining of soil and sand8	Rig operator	Silicious dust	8	6	0.65	0.26	Romanian	3	0.4
Mining of soil and sand	Mining of soil and sand8	Rig operator	Silicious dust	8	6	0.36	0.19	Romanian	3	0.4
Mining of soil and sand	Mining of soil and sand8	Rig operator	Silicious dust	8	6	0.98	0.19	Romanian	3	0.4
Mining of soil and sand	Mining of soil and sand8	Rig operator	Silicious dust	8	6	0.91	0.23	Romanian	3	0.4
Mining of soil and sand	Mining of soil and sand8	Excavator driver	Silicious dust	8	6	1.27	0.2	Romanian	3	0.4
Mining of soil and sand	Mining of soil and sand8	Excavator driver	Silicious dust	8	6	0.24	0.14	Romanian	3	0.4
Mining of soil and sand	Mining of soil and sand8	Excavator driver	Silicious dust	8	6	0.54	0.2	Romanian	3	0.4
Mining of soil and sand	Mining of soil and sand8	Transport driver	Silicious dust	8	6	0.21	0.2	Romanian	3	0.4
Mining of soil and sand	Mining of soil and sand8	Transport driver	Silicious dust	8	6	0.23	0.23	Romanian	3	0.4
Mining of soil and sand	Mining of soil and sand8	Transport driver	Silicious dust	8	6	0.21	0.2	Romanian	3	0.4
Mining of soil and sand	Mining of soil and sand8	Transport driver	Silicious dust	8	6	0.1	0.24	Romanian	3	0.4
Mining of soil and sand	Mining of soil and sand8	Transport driver	Silicious dust	8	6	0.9	0.24	Romanian	3	0.4
Mining of soil and sand	Mining of soil and sand8	Transport driver	Silicious dust	8	6	0.9	0.21	Romanian	3	0.4
Mining of soil and sand	Mining of soil and sand8	Discharge	Silicious dust	8	6	0.7	0.84	Romanian	3	0.4
Mining of soil and sand	Mining of soil and sand8	Discharge	Silicious dust	8	6	1.7	0.63	Romanian	3	0.4
Mining of soil and sand	Mining of soil and sand8	Discharge	Silicious dust	8	6	2.4	0.8	Romanian	3	0.4
Mining of soil and sand	Mining of soil and sand8	Discharge	Silicious dust	8	6	1.53	0.54	Romanian	3	0.4
Mining of soil and sand	Mining of soil and sand8	Discharge	Silicious dust	8	6	2.6	0.57	Romanian	3	0.4
Mining of soil and sand	Mining of soil and sand8	Discharge	Silicious dust	8	6	3.3	0.64	Romanian	3	0.4
Mining of soil and sand	Mining of soil and sand8	Crushing inspector	Silicious dust	8	6	2.8	0.19	Romanian	3	0.4
Mining of soil and sand	Mining of soil and sand8	Crushing inspector	Silicious dust	8	6	0.9	0.23	Romanian	3	0.4
Mining of soil and sand	Mining of soil and sand8	Crushing inspector	Silicious dust	8	6	0.9	0.26	Romanian	3	0.4
Mining of soil and sand	Mining of soil and sand8	Crushing inspector	Silicious dust	8	6	0.56	0.21	Romanian	3	0.4
Mining of soil and sand	Mining of soil and sand8	Crushing inspector	Silicious dust	8	6	0.53	0.26	Romanian	3	0.4
Mining of soil and sand	Mining of soil and sand8	Crushing inspector	Silicious dust	8	6	2.22	0.26	Romanian	3	0.4
Mining of soil and sand	Mining of soil and sand8	Forklift driver	Silicious dust	8	6	1.12	0.17	Romanian	3	0.4
Mining of soil and sand	Mining of soil and sand8	Forklift driver	Silicious dust	8	6	0.36	0.2	Romanian	3	0.4
Mining of soil and sand	Mining of soil and sand8	Forklift driver	Silicious dust	8	6	0.28	0.17	Romanian	3	0.4
Mining of soil and sand	Mining of soil and sand9	Rig operator	Silicious dust	8	6	0.21	0.59	Romanian	3	0.4
Mining of soil and sand	Mining of soil and sand9	Excavator driver	Silicious dust	8	6	0.36	0.3	Romanian	3	0.4
Mining of soil and sand	Mining of soil and sand9	Transport driver	Silicious dust	8	6	0.1	0.4	Romanian	3	0.4
Mining of soil and sand	Mining of soil and sand9	Crushing inspector	Silicious dust	8	6	0.1	0.47	Romanian	3	0.4
Mining of soil and sand	Mining of soil and sand9	Forklift driver	Silicious dust	8	6	0.1	1.16	Romanian	4	0.6
Mining of soil and sand	Mining of soil and sand9	Sprinkler driver	Silicious dust	8	6	0.69	0.37	Romanian	3	0.4
Mining of soil and sand	Mining of soil and sand10	Rig operator	Silicious dust	8	6	0.68	1	Romanian	4	0.6
Mining of soil and sand	Mining of soil and sand10	Excavator driver	Silicious dust	8	6	0.69	0.91	Romanian	3	0.4
Mining of soil and sand	Mining of soil and sand10	Transport driver	Silicious dust	8	6	0.67	2.14	Romanian	4	0.6
Mining of soil and sand	Mining of soil and sand10	Stope inspector	Silicious dust	8	6	0.66	0.94	Romanian	3	0.4
Mining of soil and sand	Mining of soil and sand10	Crushing inspector	Silicious dust	8	6	0.15	0.67	Romanian	3	0.4
Mining of soil and sand	Mining of soil and sand10	Forklift driver	Silicious dust	8	6	0.17	0.97	Romanian	3	0.4
Mining of soil and sand	Mining of soil and sand10	Sprinkler driver	Silicious dust	8	6	0.18	0.71	Romanian	3	0.4
Mining of soil and sand	Mining of soil and sand11	Rig operator	Silicious dust	8	6	0.13	1.06	Romanian	4	0.6
Mining of soil and sand	Mining of soil and sand11	Rig operator	Silicious dust	8	6	0.13	0.67	Romanian	3	0.4
Mining of soil and sand	Mining of soil and sand11	Excavator driver	Silicious dust	8	6	0.16	1.04	Romanian	4	0.6
Mining of soil and sand	Mining of soil and sand11	Transport driver	Silicious dust	8	6	0.14	1.94	Romanian	4	0.6
Mining of soil and sand	Mining of soil and sand11	Stope inspector	Silicious dust	8	6	0.1	0.91	Romanian	3	0.4
Mining of soil and sand	Mining of soil and sand11	Crushing inspector	Silicious dust	8	6	0.14	0.77	Romanian	3	0.4
Mining of soil and sand	Mining of soil and sand11	Forklift driver	Silicious dust	8	6	0.14	1.1	Romanian	4	0.6
Mining of soil and sand	Mining of soil and sand11	Sprinkler driver	Silicious dust	8	6	0.16	0.71	Romanian	3	0.4
Mining of soil and sand	Mining of soil and sand12	Excavator driver	Silicious dust	8	6	0.14	0.86	Romanian	3	0.4
Mining of soil and sand	Mining of soil and sand12	Excavator driver	Silicious dust	8	6	0.17	0.96	Romanian	3	0.4
Mining of soil and sand	Mining of soil and sand12	Excavator driver	Silicious dust	8	6	0.17	0.83	Romanian	3	0.4
Mining of soil and sand	Mining of soil and sand12	Excavator driver	Silicious dust	8	6	0.15	0.71	Romanian	3	0.4
Mining of soil and sand	Mining of soil and sand12	Excavator driver	Silicious dust	8	6	0.59	0.74	Romanian	3	0.4
Mining of soil and sand	Mining of soil and sand12	Excavator driver	Silicious dust	8	6	0.44	0.86	Romanian	3	0.4
Mining of soil and sand	Mining of soil and sand12	Transport driver	Silicious dust	8	6	0.56	0.59	Romanian	3	0.4
Mining of soil and sand	Mining of soil and sand12	Transport driver	Silicious dust	8	6	0.38	0.6	Romanian	3	0.4
Mining of soil and sand	Mining of soil and sand12	Stope inspector	Silicious dust	8	6	0.4	0.6	Romanian	3	0.4
Mining of soil and sand	Mining of soil and sand12	Stope inspector	Silicious dust	8	6	0.45	0.69	Romanian	3	0.4
Mining of soil and sand	Mining of soil and sand12	Stope inspector	Silicious dust	8	6	0.13	0.56	Romanian	3	0.4
Mining of soil and sand	Mining of soil and sand12	Discharge	Silicious dust	8	6	0.16	0.91	Romanian	3	0.4
Mining of soil and sand	Mining of soil and sand12	Discharge	Silicious dust	8	6	0.18	0.67	Romanian	3	0.4
Mining of soil and sand	Mining of soil and sand12	Discharge	Silicious dust	8	6	0.15	0.69	Romanian	3	0.4
Mining of soil and sand	Mining of soil and sand12	Crushing inspector	Silicious dust	8	6	0.18	0.76	Romanian	3	0.4
Mining of soil and sand	Mining of soil and sand12	Crushing inspector	Silicious dust	8	6	0.18	0.54	Romanian	3	0.4
Mining of soil and sand	Mining of soil and sand12	Crushing inspector	Silicious dust	8	6	0.12	0.63	Romanian	3	0.4
Mining of soil and sand	Mining of soil and sand12	Forklift driver	Silicious dust	8	6	0.14	0.67	Romanian	3	0.4
Mining of soil and sand	Mining of soil and sand12	Forklift driver	Silicious dust	8	6	0.12	0.54	Romanian	3	0.4
Mining of soil and sand	Mining of soil and sand12	Forklift driver	Silicious dust	8	6	0.41	0.49	Romanian	3	0.4
Mining of soil and sand	Mining of soil and sand12	Forklift driver	Silicious dust	8	6	0.21	0.54	Romanian	3	0.4
Mining of soil and sand	Mining of soil and sand12	Forklift driver	Silicious dust	8	6	0.28	0.59	Romanian	3	0.4
Mining of soil and sand	Mining of soil and sand12	Sprinkler driver	Silicious dust	8	6	0.33	0.63	Romanian	3	0.4
Mining of soil and sand	Mining of soil and sand12	Sprinkler driver	Silicious dust	8	6	0.81	0.59	Romanian	3	0.4
Mining of soil and sand	Mining of soil and sand12	Sprinkler driver	Silicious dust	8	6	0.26	0.51	Romanian	3	0.4
Mining of soil and sand	Mining of soil and sand1	Rig operator	Silicious dust	8	6	0.69	0.99	Australian	3	0.6
Mining of soil and sand	Mining of soil and sand1	Rig operator	Silicious dust	8	6	3.71	5.3	Australian	4	0.8
Mining of soil and sand	Mining of soil and sand1	Excavator driver	Silicious dust	8	6	2.09	2.99	Australian	4	0.8
Mining of soil and sand	Mining of soil and sand1	Excavator driver	Silicious dust	8	6	0.67	0.96	Australian	3	0.6
Mining of soil and sand	Mining of soil and sand1	Excavator driver	Silicious dust	8	6	0.65	0.93	Australian	3	0.6
Mining of soil and sand	Mining of soil and sand1	Transport driver	Silicious dust	8	6	0.66	0.94	Australian	3	0.6
Mining of soil and sand	Mining of soil and sand1	Transport driver	Silicious dust	8	6	1.69	2.41	Australian	4	0.8
Mining of soil and sand	Mining of soil and sand1	Transport driver	Silicious dust	8	6	0.67	0.96	Australian	3	0.6
Mining of soil and sand	Mining of soil and sand1	Transport driver	Silicious dust	8	6	1.94	2.77	Australian	4	0.8
Mining of soil and sand	Mining of soil and sand1	Stope inspector	Silicious dust	8	6	0.67	0.96	Australian	3	0.6
Mining of soil and sand	Mining of soil and sand1	Discharge	Silicious dust	8	6	5.55	7.93	Australian	4	0.8
Mining of soil and sand	Mining of soil and sand1	Discharge	Silicious dust	8	6	7.51	10.73	Australian	4	0.8
Mining of soil and sand	Mining of soil and sand1	Discharge	Silicious dust	8	6	2.6	3.71	Australian	4	0.8
Mining of soil and sand	Mining of soil and sand1	Crushing inspector	Silicious dust	8	6	0.69	0.99	Australian	3	0.6
Mining of soil and sand	Mining of soil and sand1	Crushing inspector	Silicious dust	8	6	0.68	0.97	Australian	3	0.6
Mining of soil and sand	Mining of soil and sand1	Crushing inspector	Silicious dust	8	6	0.69	0.99	Australian	3	0.6
Mining of soil and sand	Mining of soil and sand1	Forklift driver	Silicious dust	8	6	0.67	0.96	Australian	3	0.6
Mining of soil and sand	Mining of soil and sand1	Sprinkler driver	Silicious dust	8	6	0.66	0.94	Australian	3	0.6
Mining of soil and sand	Mining of soil and sand2	Rig operator	Silicious dust	8	6	0.7	1.34	Australian	4	0.8
Mining of soil and sand	Mining of soil and sand2	Excavator driver	Silicious dust	8	6	0.64	0.9	Australian	3	0.6
Mining of soil and sand	Mining of soil and sand2	Transport driver	Silicious dust	8	6	1.5	0.97	Australian	3	0.6
Mining of soil and sand	Mining of soil and sand2	Transport driver	Silicious dust	8	6	0.66	0.94	Australian	3	0.6
Mining of soil and sand	Mining of soil and sand2	Discharge	Silicious dust	8	6	0.47	0.94	Australian	3	0.6
Mining of soil and sand	Mining of soil and sand2	Crushing inspector	Silicious dust	8	6	0.68	0.33	Australian	3	0.6
Mining of soil and sand	Mining of soil and sand2	Forklift driver	Silicious dust	8	6	0.5	0.77	Australian	3	0.6
Mining of soil and sand	Mining of soil and sand2	Sprinkler driver	Silicious dust	8	6	0.74	0.43	Australian	3	0.6
Mining of soil and sand	Mining of soil and sand3	Rig operator	Silicious dust	8	6	0.47	2.3	Australian	4	0.8
Mining of soil and sand	Mining of soil and sand3	Rig operator	Silicious dust	8	6	0.73	21.6	Australian	3	0.6
Mining of soil and sand	Mining of soil and sand3	Excavator driver	Silicious dust	8	6	1.36	2.17	Australian	4	0.8
Mining of soil and sand	Mining of soil and sand3	Excavator driver	Silicious dust	8	6	0.64	0.5	Australian	3	0.6
Mining of soil and sand	Mining of soil and sand3	Excavator driver	Silicious dust	8	6	0.54	0.77	Australian	3	0.6
Mining of soil and sand	Mining of soil and sand3	Transport driver	Silicious dust	8	6	0.77	1.07	Australian	4	0.8
Mining of soil and sand	Mining of soil and sand3	Transport driver	Silicious dust	8	6	0.5	1.53	Australian	4	0.8
Mining of soil and sand	Mining of soil and sand3	Transport driver	Silicious dust	8	6	0.6	0.93	Australian	3	0.6
Mining of soil and sand	Mining of soil and sand3	Stope inspector	Silicious dust	8	6	0.67	2.17	Australian	4	0.8
Mining of soil and sand	Mining of soil and sand3	Stope inspector	Silicious dust	8	6	0.58	1.2	Australian	4	0.8
Mining of soil and sand	Mining of soil and sand3	Discharge	Silicious dust	8	6	0.5	3.27	Australian	4	0.8
Mining of soil and sand	Mining of soil and sand3	Crushing inspector	Silicious dust	8	6	0.52	3.03	Australian	4	0.8
Mining of soil and sand	Mining of soil and sand3	Forklift driver	Silicious dust	8	6	0.6	4.23	Australian	4	0.8
Mining of soil and sand	Mining of soil and sand3	Sprinkler driver	Silicious dust	8	6	0.41	0.8	Australian	3	0.6
Mining of soil and sand	Mining of soil and sand4	Rig operator	Silicious dust	8	6	0.42	0.77	Australian	3	0.6
Mining of soil and sand	Mining of soil and sand4	Excavator driver	Silicious dust	8	6	0.42	0.3	Australian	3	0.6
Mining of soil and sand	Mining of soil and sand4	Transport driver	Silicious dust	8	6	0.48	0.33	Australian	3	0.6
Mining of soil and sand	Mining of soil and sand4	Crushing inspector	Silicious dust	8	6	0.39	0.3	Australian	3	0.6
Mining of soil and sand	Mining of soil and sand4	Sprinkler driver	Silicious dust	8	6	0.64	0.14	Australian	3	0.6
Mining of soil and sand	Mining of soil and sand5	Rig operator	Silicious dust	8	6	0.47	1.29	Australian	4	0.8
Mining of soil and sand	Mining of soil and sand5	Excavator driver	Silicious dust	8	6	0.48	1.29	Australian	4	0.8
Mining of soil and sand	Mining of soil and sand5	Excavator driver	Silicious dust	8	6	0.53	1	Australian	4	0.8
Mining of soil and sand	Mining of soil and sand5	Transport driver	Silicious dust	8	6	0.38	2.43	Australian	4	0.8
Mining of soil and sand	Mining of soil and sand5	Transport driver	Silicious dust	8	6	0.44	3.43	Australian	4	0.8
Mining of soil and sand	Mining of soil and sand5	Stope inspector	Silicious dust	8	6	0.47	2.19	Australian	4	0.8
Mining of soil and sand	Mining of soil and sand5	Crushing inspector	Silicious dust	8	6	0.38	3.71	Australian	4	0.8
Mining of soil and sand	Mining of soil and sand5	Crushing inspector	Silicious dust	8	6	0.34	4.71	Australian	4	0.8
Mining of soil and sand	Mining of soil and sand5	Crushing inspector	Silicious dust	8	6	0.38	4	Australian	4	0.8
Mining of soil and sand	Mining of soil and sand5	Crushing inspector	Silicious dust	8	6	0.41	1.29	Australian	4	0.8
Mining of soil and sand	Mining of soil and sand6	Rig operator	Silicious dust	8	6	0.44	1.29	Australian	4	0.8
Mining of soil and sand	Mining of soil and sand6	Excavator driver	Silicious dust	8	6	0.41	0.8	Australian	3	0.6
Mining of soil and sand	Mining of soil and sand6	Transport driver	Silicious dust	8	6	0.36	0.76	Australian	3	0.6
Mining of soil and sand	Mining of soil and sand6	Crushing inspector	Silicious dust	8	6	0.94	3.17	Australian	4	0.8
Mining of soil and sand	Mining of soil and sand7	Rig operator	Silicious dust	8	6	0.63	3.73	Australian	4	0.8
Mining of soil and sand	Mining of soil and sand7	Excavator driver	Silicious dust	8	6	0.68	1.2	Australian	4	0.8
Mining of soil and sand	Mining of soil and sand7	Excavator driver	Silicious dust	8	6	0.66	0.93	Australian	3	0.6
Mining of soil and sand	Mining of soil and sand7	Excavator driver	Silicious dust	8	6	0.66	0.7	Australian	3	0.6
Mining of soil and sand	Mining of soil and sand7	Transport driver	Silicious dust	8	6	0.23	1.2	Australian	4	0.8
Mining of soil and sand	Mining of soil and sand7	Stope inspector	Silicious dust	8	6	0.54	0.33	Australian	3	0.6
Mining of soil and sand	Mining of soil and sand7	Stope inspector	Silicious dust	8	6	0.3	0.33	Australian	3	0.6
Mining of soil and sand	Mining of soil and sand7	Discharge	Silicious dust	8	6	0.69	0.36	Australian	3	0.6
Mining of soil and sand	Mining of soil and sand7	Crushing inspector	Silicious dust	8	6	6.48	0.99	Australian	3	0.6
Mining of soil and sand	Mining of soil and sand7	Crushing inspector	Silicious dust	8	6	0.65	0.97	Australian	3	0.6
Mining of soil and sand	Mining of soil and sand7	Crushing inspector	Silicious dust	8	6	0.15	0.99	Australian	3	0.6
Mining of soil and sand	Mining of soil and sand7	Forklift driver	Silicious dust	8	6	0.23	0.96	Australian	3	0.6
Mining of soil and sand	Mining of soil and sand7	Sprinkler driver	Silicious dust	8	6	0.32	0.94	Australian	3	0.6
Mining of soil and sand	Mining of soil and sand8	Rig operator	Silicious dust	8	6	0.46	0.21	Australian	3	0.6
Mining of soil and sand	Mining of soil and sand8	Rig operator	Silicious dust	8	6	0.28	0.24	Australian	3	0.6
Mining of soil and sand	Mining of soil and sand8	Rig operator	Silicious dust	8	6	0.65	0.26	Australian	3	0.6
Mining of soil and sand	Mining of soil and sand8	Rig operator	Silicious dust	8	6	0.36	0.19	Australian	3	0.6
Mining of soil and sand	Mining of soil and sand8	Rig operator	Silicious dust	8	6	0.98	0.19	Australian	3	0.6
Mining of soil and sand	Mining of soil and sand8	Rig operator	Silicious dust	8	6	0.91	0.23	Australian	3	0.6
Mining of soil and sand	Mining of soil and sand8	Excavator driver	Silicious dust	8	6	1.27	0.2	Australian	3	0.6
Mining of soil and sand	Mining of soil and sand8	Excavator driver	Silicious dust	8	6	0.24	0.14	Australian	3	0.6
Mining of soil and sand	Mining of soil and sand8	Excavator driver	Silicious dust	8	6	0.54	0.2	Australian	3	0.6
Mining of soil and sand	Mining of soil and sand8	Transport driver	Silicious dust	8	6	0.21	0.2	Australian	3	0.6
Mining of soil and sand	Mining of soil and sand8	Transport driver	Silicious dust	8	6	0.23	0.23	Australian	3	0.6
Mining of soil and sand	Mining of soil and sand8	Transport driver	Silicious dust	8	6	0.21	0.2	Australian	3	0.6
Mining of soil and sand	Mining of soil and sand8	Transport driver	Silicious dust	8	6	0.1	0.24	Australian	3	0.6
Mining of soil and sand	Mining of soil and sand8	Transport driver	Silicious dust	8	6	0.9	0.24	Australian	3	0.6
Mining of soil and sand	Mining of soil and sand8	Transport driver	Silicious dust	8	6	0.9	0.21	Australian	3	0.6
Mining of soil and sand	Mining of soil and sand8	Discharge	Silicious dust	8	6	0.7	0.84	Australian	3	0.6
Mining of soil and sand	Mining of soil and sand8	Discharge	Silicious dust	8	6	1.7	0.63	Australian	3	0.6
Mining of soil and sand	Mining of soil and sand8	Discharge	Silicious dust	8	6	2.4	0.8	Australian	3	0.6
Mining of soil and sand	Mining of soil and sand8	Discharge	Silicious dust	8	6	1.53	0.54	Australian	3	0.6
Mining of soil and sand	Mining of soil and sand8	Discharge	Silicious dust	8	6	2.6	0.57	Australian	3	0.6
Mining of soil and sand	Mining of soil and sand8	Discharge	Silicious dust	8	6	3.3	0.64	Australian	3	0.6
Mining of soil and sand	Mining of soil and sand8	Crushing inspector	Silicious dust	8	6	2.8	0.19	Australian	3	0.6
Mining of soil and sand	Mining of soil and sand8	Crushing inspector	Silicious dust	8	6	0.9	0.23	Australian	3	0.6
Mining of soil and sand	Mining of soil and sand8	Crushing inspector	Silicious dust	8	6	0.9	0.26	Australian	3	0.6
Mining of soil and sand	Mining of soil and sand8	Crushing inspector	Silicious dust	8	6	0.56	0.21	Australian	3	0.6
Mining of soil and sand	Mining of soil and sand8	Crushing inspector	Silicious dust	8	6	0.53	0.26	Australian	3	0.6
Mining of soil and sand	Mining of soil and sand8	Crushing inspector	Silicious dust	8	6	2.22	0.26	Australian	3	0.6
Mining of soil and sand	Mining of soil and sand8	Forklift driver	Silicious dust	8	6	1.12	0.17	Australian	3	0.6
Mining of soil and sand	Mining of soil and sand8	Forklift driver	Silicious dust	8	6	0.36	0.2	Australian	3	0.6
Mining of soil and sand	Mining of soil and sand8	Forklift driver	Silicious dust	8	6	0.28	0.17	Australian	3	0.6
Mining of soil and sand	Mining of soil and sand9	Rig operator	Silicious dust	8	6	0.21	0.59	Australian	3	0.6
Mining of soil and sand	Mining of soil and sand9	Excavator driver	Silicious dust	8	6	0.36	0.3	Australian	3	0.6
Mining of soil and sand	Mining of soil and sand9	Transport driver	Silicious dust	8	6	0.1	0.4	Australian	3	0.6
Mining of soil and sand	Mining of soil and sand9	Crushing inspector	Silicious dust	8	6	0.1	0.47	Australian	3	0.6
Mining of soil and sand	Mining of soil and sand9	Forklift driver	Silicious dust	8	6	0.1	1.16	Australian	4	0.8
Mining of soil and sand	Mining of soil and sand9	Sprinkler driver	Silicious dust	8	6	0.69	0.37	Australian	3	0.6
Mining of soil and sand	Mining of soil and sand10	Rig operator	Silicious dust	8	6	0.68	1	Australian	4	0.8
Mining of soil and sand	Mining of soil and sand10	Excavator driver	Silicious dust	8	6	0.69	0.91	Australian	3	0.6
Mining of soil and sand	Mining of soil and sand10	Transport driver	Silicious dust	8	6	0.67	2.14	Australian	4	0.8
Mining of soil and sand	Mining of soil and sand10	Stope inspector	Silicious dust	8	6	0.66	0.94	Australian	3	0.6
Mining of soil and sand	Mining of soil and sand10	Crushing inspector	Silicious dust	8	6	0.15	0.67	Australian	3	0.6
Mining of soil and sand	Mining of soil and sand10	Forklift driver	Silicious dust	8	6	0.17	0.97	Australian	3	0.6
Mining of soil and sand	Mining of soil and sand10	Sprinkler driver	Silicious dust	8	6	0.18	0.71	Australian	3	0.6
Mining of soil and sand	Mining of soil and sand11	Rig operator	Silicious dust	8	6	0.13	1.06	Australian	4	0.8
Mining of soil and sand	Mining of soil and sand11	Rig operator	Silicious dust	8	6	0.13	0.67	Australian	3	0.6
Mining of soil and sand	Mining of soil and sand11	Excavator driver	Silicious dust	8	6	0.16	1.04	Australian	4	0.8
Mining of soil and sand	Mining of soil and sand11	Transport driver	Silicious dust	8	6	0.14	1.94	Australian	4	0.8
Mining of soil and sand	Mining of soil and sand11	Stope inspector	Silicious dust	8	6	0.1	0.91	Australian	3	0.6
Mining of soil and sand	Mining of soil and sand11	Crushing inspector	Silicious dust	8	6	0.14	0.77	Australian	3	0.6
Mining of soil and sand	Mining of soil and sand11	Forklift driver	Silicious dust	8	6	0.14	1.1	Australian	4	0.8
Mining of soil and sand	Mining of soil and sand11	Sprinkler driver	Silicious dust	8	6	0.16	0.71	Australian	3	0.6
Mining of soil and sand	Mining of soil and sand12	Excavator driver	Silicious dust	8	6	0.14	0.86	Australian	3	0.6
Mining of soil and sand	Mining of soil and sand12	Excavator driver	Silicious dust	8	6	0.17	0.96	Australian	3	0.6
Mining of soil and sand	Mining of soil and sand12	Excavator driver	Silicious dust	8	6	0.17	0.83	Australian	3	0.6
Mining of soil and sand	Mining of soil and sand12	Excavator driver	Silicious dust	8	6	0.15	0.71	Australian	3	0.6
Mining of soil and sand	Mining of soil and sand12	Excavator driver	Silicious dust	8	6	0.59	0.74	Australian	3	0.6
Mining of soil and sand	Mining of soil and sand12	Excavator driver	Silicious dust	8	6	0.44	0.86	Australian	3	0.6
Mining of soil and sand	Mining of soil and sand12	Transport driver	Silicious dust	8	6	0.56	0.59	Australian	3	0.6
Mining of soil and sand	Mining of soil and sand12	Transport driver	Silicious dust	8	6	0.38	0.6	Australian	3	0.6
Mining of soil and sand	Mining of soil and sand12	Stope inspector	Silicious dust	8	6	0.4	0.6	Australian	3	0.6
Mining of soil and sand	Mining of soil and sand12	Stope inspector	Silicious dust	8	6	0.45	0.69	Australian	3	0.6
Mining of soil and sand	Mining of soil and sand12	Stope inspector	Silicious dust	8	6	0.13	0.56	Australian	3	0.6
Mining of soil and sand	Mining of soil and sand12	Discharge	Silicious dust	8	6	0.16	0.91	Australian	3	0.6
Mining of soil and sand	Mining of soil and sand12	Discharge	Silicious dust	8	6	0.18	0.67	Australian	3	0.6
Mining of soil and sand	Mining of soil and sand12	Discharge	Silicious dust	8	6	0.15	0.69	Australian	3	0.6
Mining of soil and sand	Mining of soil and sand12	Crushing inspector	Silicious dust	8	6	0.18	0.76	Australian	3	0.6
Mining of soil and sand	Mining of soil and sand12	Crushing inspector	Silicious dust	8	6	0.18	0.54	Australian	3	0.6
Mining of soil and sand	Mining of soil and sand12	Crushing inspector	Silicious dust	8	6	0.12	0.63	Australian	3	0.6
Mining of soil and sand	Mining of soil and sand12	Forklift driver	Silicious dust	8	6	0.14	0.67	Australian	3	0.6
Mining of soil and sand	Mining of soil and sand12	Forklift driver	Silicious dust	8	6	0.12	0.54	Australian	3	0.6
Mining of soil and sand	Mining of soil and sand12	Forklift driver	Silicious dust	8	6	0.41	0.49	Australian	3	0.6
Mining of soil and sand	Mining of soil and sand12	Forklift driver	Silicious dust	8	6	0.21	0.54	Australian	3	0.6
Mining of soil and sand	Mining of soil and sand12	Forklift driver	Silicious dust	8	6	0.28	0.59	Australian	3	0.6
Mining of soil and sand	Mining of soil and sand12	Sprinkler driver	Silicious dust	8	6	0.33	0.63	Australian	3	0.6
Mining of soil and sand	Mining of soil and sand12	Sprinkler driver	Silicious dust	8	6	0.81	0.59	Australian	3	0.6
Mining of soil and sand	Mining of soil and sand12	Sprinkler driver	Silicious dust	8	6	0.26	0.51	Australian	3	0.6
Mining of soil and sand	Mining of soil and sand1	Rig operator	Silicious dust	8	6	0.69	0.99	ICMM	5	1
Mining of soil and sand	Mining of soil and sand1	Rig operator	Silicious dust	8	6	3.71	5.3	ICMM	5	1
Mining of soil and sand	Mining of soil and sand1	Excavator driver	Silicious dust	8	6	2.09	2.99	ICMM	5	1
Mining of soil and sand	Mining of soil and sand1	Excavator driver	Silicious dust	8	6	0.67	0.96	ICMM	5	1
Mining of soil and sand	Mining of soil and sand1	Excavator driver	Silicious dust	8	6	0.65	0.93	ICMM	5	1
Mining of soil and sand	Mining of soil and sand1	Transport driver	Silicious dust	8	6	0.66	0.94	ICMM	5	1
Mining of soil and sand	Mining of soil and sand1	Transport driver	Silicious dust	8	6	1.69	2.41	ICMM	5	1
Mining of soil and sand	Mining of soil and sand1	Transport driver	Silicious dust	8	6	0.67	0.96	ICMM	5	1
Mining of soil and sand	Mining of soil and sand1	Transport driver	Silicious dust	8	6	1.94	2.77	ICMM	5	1
Mining of soil and sand	Mining of soil and sand1	Stope inspector	Silicious dust	8	6	0.67	0.96	ICMM	5	1
Mining of soil and sand	Mining of soil and sand1	Discharge	Silicious dust	8	6	5.55	7.93	ICMM	5	1
Mining of soil and sand	Mining of soil and sand1	Discharge	Silicious dust	8	6	7.51	10.73	ICMM	5	1
Mining of soil and sand	Mining of soil and sand1	Discharge	Silicious dust	8	6	2.6	3.71	ICMM	5	1
Mining of soil and sand	Mining of soil and sand1	Crushing inspector	Silicious dust	8	6	0.69	0.99	ICMM	5	1
Mining of soil and sand	Mining of soil and sand1	Crushing inspector	Silicious dust	8	6	0.68	0.97	ICMM	5	1
Mining of soil and sand	Mining of soil and sand1	Crushing inspector	Silicious dust	8	6	0.69	0.99	ICMM	5	1
Mining of soil and sand	Mining of soil and sand1	Forklift driver	Silicious dust	8	6	0.67	0.96	ICMM	5	1
Mining of soil and sand	Mining of soil and sand1	Sprinkler driver	Silicious dust	8	6	0.66	0.94	ICMM	5	1
Mining of soil and sand	Mining of soil and sand2	Rig operator	Silicious dust	8	6	0.7	1.34	ICMM	5	1
Mining of soil and sand	Mining of soil and sand2	Excavator driver	Silicious dust	8	6	0.64	0.9	ICMM	5	1
Mining of soil and sand	Mining of soil and sand2	Transport driver	Silicious dust	8	6	1.5	0.97	ICMM	5	1
Mining of soil and sand	Mining of soil and sand2	Transport driver	Silicious dust	8	6	0.66	0.94	ICMM	5	1
Mining of soil and sand	Mining of soil and sand2	Discharge	Silicious dust	8	6	0.47	0.94	ICMM	5	1
Mining of soil and sand	Mining of soil and sand2	Crushing inspector	Silicious dust	8	6	0.68	0.33	ICMM	5	1
Mining of soil and sand	Mining of soil and sand2	Forklift driver	Silicious dust	8	6	0.5	0.77	ICMM	5	1
Mining of soil and sand	Mining of soil and sand2	Sprinkler driver	Silicious dust	8	6	0.74	0.43	ICMM	5	1
Mining of soil and sand	Mining of soil and sand3	Rig operator	Silicious dust	8	6	0.47	2.3	ICMM	5	1
Mining of soil and sand	Mining of soil and sand3	Rig operator	Silicious dust	8	6	0.73	21.6	ICMM	5	1
Mining of soil and sand	Mining of soil and sand3	Excavator driver	Silicious dust	8	6	1.36	2.17	ICMM	5	1
Mining of soil and sand	Mining of soil and sand3	Excavator driver	Silicious dust	8	6	0.64	0.5	ICMM	5	1
Mining of soil and sand	Mining of soil and sand3	Excavator driver	Silicious dust	8	6	0.54	0.77	ICMM	5	1
Mining of soil and sand	Mining of soil and sand3	Transport driver	Silicious dust	8	6	0.77	1.07	ICMM	5	1
Mining of soil and sand	Mining of soil and sand3	Transport driver	Silicious dust	8	6	0.5	1.53	ICMM	5	1
Mining of soil and sand	Mining of soil and sand3	Transport driver	Silicious dust	8	6	0.6	0.93	ICMM	5	1
Mining of soil and sand	Mining of soil and sand3	Stope inspector	Silicious dust	8	6	0.67	2.17	ICMM	5	1
Mining of soil and sand	Mining of soil and sand3	Stope inspector	Silicious dust	8	6	0.58	1.2	ICMM	5	1
Mining of soil and sand	Mining of soil and sand3	Discharge	Silicious dust	8	6	0.5	3.27	ICMM	5	1
Mining of soil and sand	Mining of soil and sand3	Crushing inspector	Silicious dust	8	6	0.52	3.03	ICMM	5	1
Mining of soil and sand	Mining of soil and sand3	Forklift driver	Silicious dust	8	6	0.6	4.23	ICMM	5	1
Mining of soil and sand	Mining of soil and sand3	Sprinkler driver	Silicious dust	8	6	0.41	0.8	ICMM	5	1
Mining of soil and sand	Mining of soil and sand4	Rig operator	Silicious dust	8	6	0.42	0.77	ICMM	5	1
Mining of soil and sand	Mining of soil and sand4	Excavator driver	Silicious dust	8	6	0.42	0.3	ICMM	5	1
Mining of soil and sand	Mining of soil and sand4	Transport driver	Silicious dust	8	6	0.48	0.33	ICMM	5	1
Mining of soil and sand	Mining of soil and sand4	Crushing inspector	Silicious dust	8	6	0.39	0.3	ICMM	5	1
Mining of soil and sand	Mining of soil and sand4	Sprinkler driver	Silicious dust	8	6	0.64	0.14	ICMM	5	1
Mining of soil and sand	Mining of soil and sand5	Rig operator	Silicious dust	8	6	0.47	1.29	ICMM	5	1
Mining of soil and sand	Mining of soil and sand5	Excavator driver	Silicious dust	8	6	0.48	1.29	ICMM	5	1
Mining of soil and sand	Mining of soil and sand5	Excavator driver	Silicious dust	8	6	0.53	1	ICMM	5	1
Mining of soil and sand	Mining of soil and sand5	Transport driver	Silicious dust	8	6	0.38	2.43	ICMM	5	1
Mining of soil and sand	Mining of soil and sand5	Transport driver	Silicious dust	8	6	0.44	3.43	ICMM	5	1
Mining of soil and sand	Mining of soil and sand5	Stope inspector	Silicious dust	8	6	0.47	2.19	ICMM	5	1
Mining of soil and sand	Mining of soil and sand5	Crushing inspector	Silicious dust	8	6	0.38	3.71	ICMM	5	1
Mining of soil and sand	Mining of soil and sand5	Crushing inspector	Silicious dust	8	6	0.34	4.71	ICMM	5	1
Mining of soil and sand	Mining of soil and sand5	Crushing inspector	Silicious dust	8	6	0.38	4	ICMM	5	1
Mining of soil and sand	Mining of soil and sand5	Crushing inspector	Silicious dust	8	6	0.41	1.29	ICMM	5	1
Mining of soil and sand	Mining of soil and sand6	Rig operator	Silicious dust	8	6	0.44	1.29	ICMM	5	1
Mining of soil and sand	Mining of soil and sand6	Excavator driver	Silicious dust	8	6	0.41	0.8	ICMM	5	1
Mining of soil and sand	Mining of soil and sand6	Transport driver	Silicious dust	8	6	0.36	0.76	ICMM	5	1
Mining of soil and sand	Mining of soil and sand6	Crushing inspector	Silicious dust	8	6	0.94	3.17	ICMM	5	1
Mining of soil and sand	Mining of soil and sand7	Rig operator	Silicious dust	8	6	0.63	3.73	ICMM	5	1
Mining of soil and sand	Mining of soil and sand7	Excavator driver	Silicious dust	8	6	0.68	1.2	ICMM	5	1
Mining of soil and sand	Mining of soil and sand7	Excavator driver	Silicious dust	8	6	0.66	0.93	ICMM	5	1
Mining of soil and sand	Mining of soil and sand7	Excavator driver	Silicious dust	8	6	0.66	0.7	ICMM	5	1
Mining of soil and sand	Mining of soil and sand7	Transport driver	Silicious dust	8	6	0.23	1.2	ICMM	5	1
Mining of soil and sand	Mining of soil and sand7	Stope inspector	Silicious dust	8	6	0.54	0.33	ICMM	5	1
Mining of soil and sand	Mining of soil and sand7	Stope inspector	Silicious dust	8	6	0.3	0.33	ICMM	5	1
Mining of soil and sand	Mining of soil and sand7	Discharge	Silicious dust	8	6	0.69	0.36	ICMM	5	1
Mining of soil and sand	Mining of soil and sand7	Crushing inspector	Silicious dust	8	6	6.48	0.99	ICMM	5	1
Mining of soil and sand	Mining of soil and sand7	Crushing inspector	Silicious dust	8	6	0.65	0.97	ICMM	5	1
Mining of soil and sand	Mining of soil and sand7	Crushing inspector	Silicious dust	8	6	0.15	0.99	ICMM	5	1
Mining of soil and sand	Mining of soil and sand7	Forklift driver	Silicious dust	8	6	0.23	0.96	ICMM	5	1
Mining of soil and sand	Mining of soil and sand7	Sprinkler driver	Silicious dust	8	6	0.32	0.94	ICMM	5	1
Mining of soil and sand	Mining of soil and sand8	Rig operator	Silicious dust	8	6	0.46	0.21	ICMM	5	1
Mining of soil and sand	Mining of soil and sand8	Rig operator	Silicious dust	8	6	0.28	0.24	ICMM	5	1
Mining of soil and sand	Mining of soil and sand8	Rig operator	Silicious dust	8	6	0.65	0.26	ICMM	5	1
Mining of soil and sand	Mining of soil and sand8	Rig operator	Silicious dust	8	6	0.36	0.19	ICMM	5	1
Mining of soil and sand	Mining of soil and sand8	Rig operator	Silicious dust	8	6	0.98	0.19	ICMM	5	1
Mining of soil and sand	Mining of soil and sand8	Rig operator	Silicious dust	8	6	0.91	0.23	ICMM	5	1
Mining of soil and sand	Mining of soil and sand8	Excavator driver	Silicious dust	8	6	1.27	0.2	ICMM	5	1
Mining of soil and sand	Mining of soil and sand8	Excavator driver	Silicious dust	8	6	0.24	0.14	ICMM	5	1
Mining of soil and sand	Mining of soil and sand8	Excavator driver	Silicious dust	8	6	0.54	0.2	ICMM	5	1
Mining of soil and sand	Mining of soil and sand8	Transport driver	Silicious dust	8	6	0.21	0.2	ICMM	5	1
Mining of soil and sand	Mining of soil and sand8	Transport driver	Silicious dust	8	6	0.23	0.23	ICMM	5	1
Mining of soil and sand	Mining of soil and sand8	Transport driver	Silicious dust	8	6	0.21	0.2	ICMM	5	1
Mining of soil and sand	Mining of soil and sand8	Transport driver	Silicious dust	8	6	0.1	0.24	ICMM	5	1
Mining of soil and sand	Mining of soil and sand8	Transport driver	Silicious dust	8	6	0.9	0.24	ICMM	5	1
Mining of soil and sand	Mining of soil and sand8	Transport driver	Silicious dust	8	6	0.9	0.21	ICMM	5	1
Mining of soil and sand	Mining of soil and sand8	Discharge	Silicious dust	8	6	0.7	0.84	ICMM	5	1
Mining of soil and sand	Mining of soil and sand8	Discharge	Silicious dust	8	6	1.7	0.63	ICMM	5	1
Mining of soil and sand	Mining of soil and sand8	Discharge	Silicious dust	8	6	2.4	0.8	ICMM	5	1
Mining of soil and sand	Mining of soil and sand8	Discharge	Silicious dust	8	6	1.53	0.54	ICMM	5	1
Mining of soil and sand	Mining of soil and sand8	Discharge	Silicious dust	8	6	2.6	0.57	ICMM	5	1
Mining of soil and sand	Mining of soil and sand8	Discharge	Silicious dust	8	6	3.3	0.64	ICMM	5	1
Mining of soil and sand	Mining of soil and sand8	Crushing inspector	Silicious dust	8	6	2.8	0.19	ICMM	5	1
Mining of soil and sand	Mining of soil and sand8	Crushing inspector	Silicious dust	8	6	0.9	0.23	ICMM	5	1
Mining of soil and sand	Mining of soil and sand8	Crushing inspector	Silicious dust	8	6	0.9	0.26	ICMM	5	1
Mining of soil and sand	Mining of soil and sand8	Crushing inspector	Silicious dust	8	6	0.56	0.21	ICMM	5	1
Mining of soil and sand	Mining of soil and sand8	Crushing inspector	Silicious dust	8	6	0.53	0.26	ICMM	5	1
Mining of soil and sand	Mining of soil and sand8	Crushing inspector	Silicious dust	8	6	2.22	0.26	ICMM	5	1
Mining of soil and sand	Mining of soil and sand8	Forklift driver	Silicious dust	8	6	1.12	0.17	ICMM	5	1
Mining of soil and sand	Mining of soil and sand8	Forklift driver	Silicious dust	8	6	0.36	0.2	ICMM	5	1
Mining of soil and sand	Mining of soil and sand8	Forklift driver	Silicious dust	8	6	0.28	0.17	ICMM	5	1
Mining of soil and sand	Mining of soil and sand9	Rig operator	Silicious dust	8	6	0.21	0.59	ICMM	5	1
Mining of soil and sand	Mining of soil and sand9	Excavator driver	Silicious dust	8	6	0.36	0.3	ICMM	5	1
Mining of soil and sand	Mining of soil and sand9	Transport driver	Silicious dust	8	6	0.1	0.4	ICMM	5	1
Mining of soil and sand	Mining of soil and sand9	Crushing inspector	Silicious dust	8	6	0.1	0.47	ICMM	5	1
Mining of soil and sand	Mining of soil and sand9	Forklift driver	Silicious dust	8	6	0.1	1.16	ICMM	5	1
Mining of soil and sand	Mining of soil and sand9	Sprinkler driver	Silicious dust	8	6	0.69	0.37	ICMM	5	1
Mining of soil and sand	Mining of soil and sand10	Rig operator	Silicious dust	8	6	0.68	1	ICMM	5	1
Mining of soil and sand	Mining of soil and sand10	Excavator driver	Silicious dust	8	6	0.69	0.91	ICMM	5	1
Mining of soil and sand	Mining of soil and sand10	Transport driver	Silicious dust	8	6	0.67	2.14	ICMM	5	1
Mining of soil and sand	Mining of soil and sand10	Stope inspector	Silicious dust	8	6	0.66	0.94	ICMM	5	1
Mining of soil and sand	Mining of soil and sand10	Crushing inspector	Silicious dust	8	6	0.15	0.67	ICMM	5	1
Mining of soil and sand	Mining of soil and sand10	Forklift driver	Silicious dust	8	6	0.17	0.97	ICMM	5	1
Mining of soil and sand	Mining of soil and sand10	Sprinkler driver	Silicious dust	8	6	0.18	0.71	ICMM	5	1
Mining of soil and sand	Mining of soil and sand11	Rig operator	Silicious dust	8	6	0.13	1.06	ICMM	5	1
Mining of soil and sand	Mining of soil and sand11	Rig operator	Silicious dust	8	6	0.13	0.67	ICMM	5	1
Mining of soil and sand	Mining of soil and sand11	Excavator driver	Silicious dust	8	6	0.16	1.04	ICMM	5	1
Mining of soil and sand	Mining of soil and sand11	Transport driver	Silicious dust	8	6	0.14	1.94	ICMM	5	1
Mining of soil and sand	Mining of soil and sand11	Stope inspector	Silicious dust	8	6	0.1	0.91	ICMM	5	1
Mining of soil and sand	Mining of soil and sand11	Crushing inspector	Silicious dust	8	6	0.14	0.77	ICMM	5	1
Mining of soil and sand	Mining of soil and sand11	Forklift driver	Silicious dust	8	6	0.14	1.1	ICMM	5	1
Mining of soil and sand	Mining of soil and sand11	Sprinkler driver	Silicious dust	8	6	0.16	0.71	ICMM	5	1
Mining of soil and sand	Mining of soil and sand12	Excavator driver	Silicious dust	8	6	0.14	0.86	ICMM	5	1
Mining of soil and sand	Mining of soil and sand12	Excavator driver	Silicious dust	8	6	0.17	0.96	ICMM	5	1
Mining of soil and sand	Mining of soil and sand12	Excavator driver	Silicious dust	8	6	0.17	0.83	ICMM	5	1
Mining of soil and sand	Mining of soil and sand12	Excavator driver	Silicious dust	8	6	0.15	0.71	ICMM	5	1
Mining of soil and sand	Mining of soil and sand12	Excavator driver	Silicious dust	8	6	0.59	0.74	ICMM	5	1
Mining of soil and sand	Mining of soil and sand12	Excavator driver	Silicious dust	8	6	0.44	0.86	ICMM	5	1
Mining of soil and sand	Mining of soil and sand12	Transport driver	Silicious dust	8	6	0.56	0.59	ICMM	5	1
Mining of soil and sand	Mining of soil and sand12	Transport driver	Silicious dust	8	6	0.38	0.6	ICMM	5	1
Mining of soil and sand	Mining of soil and sand12	Stope inspector	Silicious dust	8	6	0.4	0.6	ICMM	5	1
Mining of soil and sand	Mining of soil and sand12	Stope inspector	Silicious dust	8	6	0.45	0.69	ICMM	5	1
Mining of soil and sand	Mining of soil and sand12	Stope inspector	Silicious dust	8	6	0.13	0.56	ICMM	5	1
Mining of soil and sand	Mining of soil and sand12	Discharge	Silicious dust	8	6	0.16	0.91	ICMM	5	1
Mining of soil and sand	Mining of soil and sand12	Discharge	Silicious dust	8	6	0.18	0.67	ICMM	5	1
Mining of soil and sand	Mining of soil and sand12	Discharge	Silicious dust	8	6	0.15	0.69	ICMM	5	1
Mining of soil and sand	Mining of soil and sand12	Crushing inspector	Silicious dust	8	6	0.18	0.76	ICMM	5	1
Mining of soil and sand	Mining of soil and sand12	Crushing inspector	Silicious dust	8	6	0.18	0.54	ICMM	5	1
Mining of soil and sand	Mining of soil and sand12	Crushing inspector	Silicious dust	8	6	0.12	0.63	ICMM	5	1
Mining of soil and sand	Mining of soil and sand12	Forklift driver	Silicious dust	8	6	0.14	0.67	ICMM	5	1
Mining of soil and sand	Mining of soil and sand12	Forklift driver	Silicious dust	8	6	0.12	0.54	ICMM	5	1
Mining of soil and sand	Mining of soil and sand12	Forklift driver	Silicious dust	8	6	0.41	0.49	ICMM	5	1
Mining of soil and sand	Mining of soil and sand12	Forklift driver	Silicious dust	8	6	0.21	0.54	ICMM	5	1
Mining of soil and sand	Mining of soil and sand12	Forklift driver	Silicious dust	8	6	0.28	0.59	ICMM	5	1
Mining of soil and sand	Mining of soil and sand12	Sprinkler driver	Silicious dust	8	6	0.33	0.63	ICMM	5	1
Mining of soil and sand	Mining of soil and sand12	Sprinkler driver	Silicious dust	8	6	0.81	0.59	ICMM	5	1
Mining of soil and sand	Mining of soil and sand12	Sprinkler driver	Silicious dust	8	6	0.26	0.51	ICMM	5	1
Ferrous casting	Ferrous casting1	Moulding	Silicious dust	8	6	0.2	0.4	EPA	#NULL!	#NULL!
Ferrous casting	Ferrous casting1	Smelting	Other dust	8	6	0.25	0.06	EPA	#NULL!	#NULL!
Ferrous casting	Ferrous casting1	Casting	Other dust	8	6	0.25	0.06	EPA	#NULL!	#NULL!
Ferrous casting	Ferrous casting1	Sand stripping	Silicious dust	8	6	0.8	0.8	EPA	#NULL!	#NULL!
Ferrous casting	Ferrous casting1	Shot blasting	Silicious dust	8	6	0.25	0.5	EPA	#NULL!	#NULL!
Ferrous casting	Ferrous casting2	Moulding	Silicious dust	8	6	0.4	0.8	EPA	#NULL!	#NULL!
Ferrous casting	Ferrous casting2	Smelting	Other dust	8	6	0.6	0.08	EPA	#NULL!	#NULL!
Ferrous casting	Ferrous casting2	Casting	Other dust	8	6	0.6	0.08	EPA	#NULL!	#NULL!
Ferrous casting	Ferrous casting2	Sand stripping	Silicious dust	8	6	0.15	0.15	EPA	#NULL!	#NULL!
Ferrous casting	Ferrous casting2	Shot blasting	Silicious dust	8	6	6.8	13.6	EPA	#NULL!	#NULL!
Ferrous casting	Ferrous casting3	Moulding	Silicious dust	8	6	3.6	7.2	EPA	#NULL!	#NULL!
Ferrous casting	Ferrous casting3	Smelting	Other dust	8	6	0.2	0.05	EPA	#NULL!	#NULL!
Ferrous casting	Ferrous casting3	Casting	Other dust	8	6	0.2	0.05	EPA	#NULL!	#NULL!
Ferrous casting	Ferrous casting3	Sand stripping	Silicious dust	8	6	0.58	0.58	EPA	#NULL!	#NULL!
Ferrous casting	Ferrous casting3	Shot blasting	Silicious dust	8	6	6.5	13	EPA	#NULL!	#NULL!
Ferrous casting	Ferrous casting4	Moulding	Silicious dust	8	6	0.21	0.38	EPA	#NULL!	#NULL!
Ferrous casting	Ferrous casting4	Moulding	Silicious dust	8	6	0.33	0.6	EPA	#NULL!	#NULL!
Ferrous casting	Ferrous casting4	Moulding	Silicious dust	8	6	0.54	0.98	EPA	#NULL!	#NULL!
Ferrous casting	Ferrous casting4	Casting	Other dust	8	6	0.12	0.03	EPA	#NULL!	#NULL!
Ferrous casting	Ferrous casting5	Moulding	Silicious dust	8	6	0.58	1.05	EPA	#NULL!	#NULL!
Ferrous casting	Ferrous casting5	Moulding	Silicious dust	8	6	0.45	0.82	EPA	#NULL!	#NULL!
Ferrous casting	Ferrous casting5	Casting	Silicious dust	8	6	0.38	0.69	EPA	#NULL!	#NULL!
Ferrous casting	Ferrous casting5	Sand stripping	Silicious dust	8	6	0.39	0.71	EPA	#NULL!	#NULL!
Ferrous casting	Ferrous casting6	Moulding	Silicious dust	8	6	2.21	4.02	EPA	#NULL!	#NULL!
Ferrous casting	Ferrous casting6	Moulding	Silicious dust	8	6	2.08	3.78	EPA	#NULL!	#NULL!
Ferrous casting	Ferrous casting6	Moulding	Silicious dust	8	6	2.17	3.95	EPA	#NULL!	#NULL!
Ferrous casting	Ferrous casting6	Casting	Silicious dust	8	6	0.42	0.76	EPA	#NULL!	#NULL!
Ferrous casting	Ferrous casting6	Casting	Silicious dust	8	6	0.33	0.6	EPA	#NULL!	#NULL!
Ferrous casting	Ferrous casting7	Moulding	Silicious dust	8	6	0.33	0.6	EPA	#NULL!	#NULL!
Ferrous casting	Ferrous casting7	Smelting	Other dust	8	6	0.54	0.14	EPA	#NULL!	#NULL!
Ferrous casting	Ferrous casting7	Casting	Silicious dust	8	6	0.21	0.38	EPA	#NULL!	#NULL!
Ferrous casting	Ferrous casting8	Moulding	Silicious dust	8	6	0.88	1.6	EPA	#NULL!	#NULL!
Ferrous casting	Ferrous casting8	Moulding	Silicious dust	8	6	0.83	1.51	EPA	#NULL!	#NULL!
Ferrous casting	Ferrous casting8	Sand stripping	Silicious dust	8	6	0.25	0.45	EPA	#NULL!	#NULL!
Ferrous casting	Ferrous casting9	Moulding	Silicious dust	8	6	0.67	0.96	EPA	#NULL!	#NULL!
Ferrous casting	Ferrous casting9	Moulding	Silicious dust	8	6	0.71	1.01	EPA	#NULL!	#NULL!
Ferrous casting	Ferrous casting9	Sand stripping	Silicious dust	8	6	1.38	1.97	EPA	#NULL!	#NULL!
Ferrous casting	Ferrous casting9	Sand stripping	Silicious dust	8	6	0.79	1.13	EPA	#NULL!	#NULL!
Ferrous casting	Ferrous casting10	Moulding	Silicious dust	8	6	4.3	4.3	EPA	#NULL!	#NULL!
Ferrous casting	Ferrous casting10	Moulding	Silicious dust	8	6	4.6	4.6	EPA	#NULL!	#NULL!
Ferrous casting	Ferrous casting10	Casting	Silicious dust	8	6	0.7	0.7	EPA	#NULL!	#NULL!
Ferrous casting	Ferrous casting10	Sand stripping	Silicious dust	8	6	0.6	0.6	EPA	#NULL!	#NULL!
Ferrous casting	Ferrous casting11	Moulding	Silicious dust	8	6	0.5	0.5	EPA	#NULL!	#NULL!
Ferrous casting	Ferrous casting11	Moulding	Silicious dust	8	6	2	2	EPA	#NULL!	#NULL!
Ferrous casting	Ferrous casting11	Sand stripping	Silicious dust	8	6	7.5	7.5	EPA	#NULL!	#NULL!
Ferrous casting	Ferrous casting12	Moulding	Silicious dust	8	6	0.2	0.2	EPA	#NULL!	#NULL!
Ferrous casting	Ferrous casting12	Moulding	Silicious dust	8	6	0.2	0.2	EPA	#NULL!	#NULL!
Ferrous casting	Ferrous casting12	Moulding	Silicious dust	8	6	0.2	0.2	EPA	#NULL!	#NULL!
Ferrous casting	Ferrous casting12	Sand stripping	Silicious dust	8	6	0.2	0.2	EPA	#NULL!	#NULL!
Ferrous casting	Ferrous casting13	Moulding	Silicious dust	8	6	0.65	0.65	EPA	#NULL!	#NULL!
Ferrous casting	Ferrous casting13	Moulding	Silicious dust	8	6	1.5	1.5	EPA	#NULL!	#NULL!
Ferrous casting	Ferrous casting13	Moulding	Silicious dust	8	6	0.2	0.2	EPA	#NULL!	#NULL!
Ferrous casting	Ferrous casting13	Moulding	Silicious dust	8	6	0.6	0.6	EPA	#NULL!	#NULL!
Ferrous casting	Ferrous casting13	Moulding	Silicious dust	8	6	0.2	0.2	EPA	#NULL!	#NULL!
Ferrous casting	Ferrous casting13	Smelting	Other dust	8	6	2.9	0.36	EPA	#NULL!	#NULL!
Ferrous casting	Ferrous casting13	Casting	Other dust	8	6	1.4	0.18	EPA	#NULL!	#NULL!
Ferrous casting	Ferrous casting13	Casting	Other dust	8	6	2.9	0.36	EPA	#NULL!	#NULL!
Ferrous casting	Ferrous casting13	Sand stripping	Silicious dust	8	6	0.2	0.2	EPA	#NULL!	#NULL!
Ferrous casting	Ferrous casting14	Moulding	Silicious dust	8	6	0.2	0.2	EPA	#NULL!	#NULL!
Ferrous casting	Ferrous casting14	Moulding	Silicious dust	8	6	0.59	0.59	EPA	#NULL!	#NULL!
Ferrous casting	Ferrous casting14	Moulding	Silicious dust	8	6	0.6	0.6	EPA	#NULL!	#NULL!
Ferrous casting	Ferrous casting14	Moulding	Silicious dust	8	6	2.48	2.48	EPA	#NULL!	#NULL!
Ferrous casting	Ferrous casting14	Smelting	Other dust	8	6	2.1	0.26	EPA	#NULL!	#NULL!
Ferrous casting	Ferrous casting14	Casting	Other dust	8	6	1.6	0.2	EPA	#NULL!	#NULL!
Ferrous casting	Ferrous casting14	Sand stripping	Silicious dust	8	6	0.2	0.2	EPA	#NULL!	#NULL!
Ferrous casting	Ferrous casting14	Sand stripping	Silicious dust	8	6	0.2	0.2	EPA	#NULL!	#NULL!
Ferrous casting	Ferrous casting14	Sand stripping	Silicious dust	8	6	0.9	0.9	EPA	#NULL!	#NULL!
Ferrous casting	Ferrous casting15	Moulding	Silicious dust	8	6	0.4	0.4	EPA	#NULL!	#NULL!
Ferrous casting	Ferrous casting15	Moulding	Silicious dust	8	6	0.2	0.2	EPA	#NULL!	#NULL!
Ferrous casting	Ferrous casting15	Casting	Silicious dust	8	6	0.2	0.2	EPA	#NULL!	#NULL!
Ferrous casting	Ferrous casting15	Sand stripping	Silicious dust	8	6	0.4	0.4	EPA	#NULL!	#NULL!
Ferrous casting	Ferrous casting16	Moulding	Silicious dust	8	6	3.28	3.28	EPA	#NULL!	#NULL!
Ferrous casting	Ferrous casting16	Casting	Silicious dust	8	6	0.9	0.9	EPA	#NULL!	#NULL!
Ferrous casting	Ferrous casting16	Sand stripping	Silicious dust	8	6	7.1	7.1	EPA	#NULL!	#NULL!
Ferrous casting	Ferrous casting16	Shot blasting	Silicious dust	8	6	0.7	0.7	EPA	#NULL!	#NULL!
Ferrous casting	Ferrous casting17	Moulding	Silicious dust	8	6	0.72	0.72	EPA	#NULL!	#NULL!
Ferrous casting	Ferrous casting17	Moulding	Silicious dust	8	6	0.84	0.84	EPA	#NULL!	#NULL!
Ferrous casting	Ferrous casting17	Moulding	Silicious dust	8	6	0.92	0.92	EPA	#NULL!	#NULL!
Ferrous casting	Ferrous casting17	Moulding	Silicious dust	8	6	0.8	0.8	EPA	#NULL!	#NULL!
Ferrous casting	Ferrous casting17	Moulding	Silicious dust	8	6	0.76	0.76	EPA	#NULL!	#NULL!
Ferrous casting	Ferrous casting17	Moulding	Silicious dust	8	6	0.79	0.79	EPA	#NULL!	#NULL!
Ferrous casting	Ferrous casting17	Moulding	Silicious dust	8	6	0.81	0.81	EPA	#NULL!	#NULL!
Ferrous casting	Ferrous casting17	Moulding	Silicious dust	8	6	0.78	0.78	EPA	#NULL!	#NULL!
Ferrous casting	Ferrous casting17	Casting	Silicious dust	8	6	0.82	0.82	EPA	#NULL!	#NULL!
Ferrous casting	Ferrous casting17	Casting	Silicious dust	8	6	0.85	0.85	EPA	#NULL!	#NULL!
Ferrous casting	Ferrous casting17	Casting	Silicious dust	8	6	0.72	0.72	EPA	#NULL!	#NULL!
Ferrous casting	Ferrous casting17	Casting	Silicious dust	8	6	0.88	0.88	EPA	#NULL!	#NULL!
Ferrous casting	Ferrous casting17	Casting	Silicious dust	8	6	1.66	1.66	EPA	#NULL!	#NULL!
Ferrous casting	Ferrous casting17	Casting	Silicious dust	8	6	0.73	0.73	EPA	#NULL!	#NULL!
Ferrous casting	Ferrous casting17	Sand stripping	Silicious dust	8	6	0.87	0.87	EPA	#NULL!	#NULL!
Ferrous casting	Ferrous casting17	Sand stripping	Silicious dust	8	6	0.94	0.94	EPA	#NULL!	#NULL!
Ferrous casting	Ferrous casting17	Sand stripping	Silicious dust	8	6	0.65	0.65	EPA	#NULL!	#NULL!
Ferrous casting	Ferrous casting17	Sand stripping	Silicious dust	8	6	0.82	0.82	EPA	#NULL!	#NULL!
Ferrous casting	Ferrous casting17	Sand stripping	Silicious dust	8	6	0.85	0.85	EPA	#NULL!	#NULL!
Ferrous casting	Ferrous casting17	Sand stripping	Silicious dust	8	6	0.82	0.82	EPA	#NULL!	#NULL!
Ferrous casting	Ferrous casting17	Sand stripping	Silicious dust	8	6	0.4	0.4	EPA	#NULL!	#NULL!
Ferrous casting	Ferrous casting17	Shot blasting	Silicious dust	8	6	1.7	1.7	EPA	#NULL!	#NULL!
Ferrous casting	Ferrous casting1	Moulding	Silicious dust	8	6	0.2	0.4	Singaporean	3	0.6
Ferrous casting	Ferrous casting1	Smelting	Other dust	8	6	0.25	0.06	Singaporean	2	0.4
Ferrous casting	Ferrous casting1	Casting	Other dust	8	6	0.25	0.06	Singaporean	2	0.4
Ferrous casting	Ferrous casting1	Sand stripping	Silicious dust	8	6	0.8	0.8	Singaporean	4	0.8
Ferrous casting	Ferrous casting1	Shot blasting	Silicious dust	8	6	0.25	0.5	Singaporean	4	0.8
Ferrous casting	Ferrous casting2	Moulding	Silicious dust	8	6	0.4	0.8	Singaporean	4	0.8
Ferrous casting	Ferrous casting2	Smelting	Other dust	8	6	0.6	0.08	Singaporean	2	0.4
Ferrous casting	Ferrous casting2	Casting	Other dust	8	6	0.6	0.08	Singaporean	2	0.4
Ferrous casting	Ferrous casting2	Sand stripping	Silicious dust	8	6	0.15	0.15	Singaporean	3	0.6
Ferrous casting	Ferrous casting2	Shot blasting	Silicious dust	8	6	6.8	13.6	Singaporean	5	1
Ferrous casting	Ferrous casting3	Moulding	Silicious dust	8	6	3.6	7.2	Singaporean	5	1
Ferrous casting	Ferrous casting3	Smelting	Other dust	8	6	0.2	0.05	Singaporean	2	0.4
Ferrous casting	Ferrous casting3	Casting	Other dust	8	6	0.2	0.05	Singaporean	2	0.4
Ferrous casting	Ferrous casting3	Sand stripping	Silicious dust	8	6	0.58	0.58	Singaporean	4	0.8
Ferrous casting	Ferrous casting3	Shot blasting	Silicious dust	8	6	6.5	13	Singaporean	5	1
Ferrous casting	Ferrous casting4	Moulding	Silicious dust	8	6	0.21	0.38	Singaporean	3	0.6
Ferrous casting	Ferrous casting4	Moulding	Silicious dust	8	6	0.33	0.6	Singaporean	4	0.8
Ferrous casting	Ferrous casting4	Moulding	Silicious dust	8	6	0.54	0.98	Singaporean	4	0.8
Ferrous casting	Ferrous casting4	Casting	Other dust	8	6	0.12	0.03	Singaporean	2	0.4
Ferrous casting	Ferrous casting5	Moulding	Silicious dust	8	6	0.58	1.05	Singaporean	4	0.8
Ferrous casting	Ferrous casting5	Moulding	Silicious dust	8	6	0.45	0.82	Singaporean	4	0.8
Ferrous casting	Ferrous casting5	Casting	Silicious dust	8	6	0.38	0.69	Singaporean	4	0.8
Ferrous casting	Ferrous casting5	Sand stripping	Silicious dust	8	6	0.39	0.71	Singaporean	4	0.8
Ferrous casting	Ferrous casting6	Moulding	Silicious dust	8	6	2.21	4.02	Singaporean	5	1
Ferrous casting	Ferrous casting6	Moulding	Silicious dust	8	6	2.08	3.78	Singaporean	5	1
Ferrous casting	Ferrous casting6	Moulding	Silicious dust	8	6	2.17	3.95	Singaporean	5	1
Ferrous casting	Ferrous casting6	Casting	Silicious dust	8	6	0.42	0.76	Singaporean	4	0.8
Ferrous casting	Ferrous casting6	Casting	Silicious dust	8	6	0.33	0.6	Singaporean	4	0.8
Ferrous casting	Ferrous casting7	Moulding	Silicious dust	8	6	0.33	0.6	Singaporean	4	0.8
Ferrous casting	Ferrous casting7	Smelting	Other dust	8	6	0.54	0.14	Singaporean	2	0.4
Ferrous casting	Ferrous casting7	Casting	Silicious dust	8	6	0.21	0.38	Singaporean	3	0.6
Ferrous casting	Ferrous casting8	Moulding	Silicious dust	8	6	0.88	1.6	Singaporean	4	0.8
Ferrous casting	Ferrous casting8	Moulding	Silicious dust	8	6	0.83	1.51	Singaporean	4	0.8
Ferrous casting	Ferrous casting8	Sand stripping	Silicious dust	8	6	0.25	0.45	Singaporean	4	0.8
Ferrous casting	Ferrous casting9	Moulding	Silicious dust	8	6	0.67	0.96	Singaporean	4	0.8
Ferrous casting	Ferrous casting9	Moulding	Silicious dust	8	6	0.71	1.01	Singaporean	4	0.8
Ferrous casting	Ferrous casting9	Sand stripping	Silicious dust	8	6	1.38	1.97	Singaporean	5	1
Ferrous casting	Ferrous casting9	Sand stripping	Silicious dust	8	6	0.79	1.13	Singaporean	4	0.8
Ferrous casting	Ferrous casting10	Moulding	Silicious dust	8	6	4.3	4.3	Singaporean	5	1
Ferrous casting	Ferrous casting10	Moulding	Silicious dust	8	6	4.6	4.6	Singaporean	5	1
Ferrous casting	Ferrous casting10	Casting	Silicious dust	8	6	0.7	0.7	Singaporean	4	0.8
Ferrous casting	Ferrous casting10	Sand stripping	Silicious dust	8	6	0.6	0.6	Singaporean	4	0.8
Ferrous casting	Ferrous casting11	Moulding	Silicious dust	8	6	0.5	0.5	Singaporean	4	0.8
Ferrous casting	Ferrous casting11	Moulding	Silicious dust	8	6	2	2	Singaporean	5	1
Ferrous casting	Ferrous casting11	Sand stripping	Silicious dust	8	6	7.5	7.5	Singaporean	5	1
Ferrous casting	Ferrous casting12	Moulding	Silicious dust	8	6	0.2	0.2	Singaporean	3	0.6
Ferrous casting	Ferrous casting12	Moulding	Silicious dust	8	6	0.2	0.2	Singaporean	3	0.6
Ferrous casting	Ferrous casting12	Moulding	Silicious dust	8	6	0.2	0.2	Singaporean	3	0.6
Ferrous casting	Ferrous casting12	Sand stripping	Silicious dust	8	6	0.2	0.2	Singaporean	3	0.6
Ferrous casting	Ferrous casting13	Moulding	Silicious dust	8	6	0.65	0.65	Singaporean	4	0.8
Ferrous casting	Ferrous casting13	Moulding	Silicious dust	8	6	1.5	1.5	Singaporean	4	0.8
Ferrous casting	Ferrous casting13	Moulding	Silicious dust	8	6	0.2	0.2	Singaporean	3	0.6
Ferrous casting	Ferrous casting13	Moulding	Silicious dust	8	6	0.6	0.6	Singaporean	4	0.8
Ferrous casting	Ferrous casting13	Moulding	Silicious dust	8	6	0.2	0.2	Singaporean	3	0.6
Ferrous casting	Ferrous casting13	Smelting	Other dust	8	6	2.9	0.36	Singaporean	2	0.4
Ferrous casting	Ferrous casting13	Casting	Other dust	8	6	1.4	0.18	Singaporean	2	0.4
Ferrous casting	Ferrous casting13	Casting	Other dust	8	6	2.9	0.36	Singaporean	2	0.4
Ferrous casting	Ferrous casting13	Sand stripping	Silicious dust	8	6	0.2	0.2	Singaporean	3	0.6
Ferrous casting	Ferrous casting14	Moulding	Silicious dust	8	6	0.2	0.2	Singaporean	3	0.6
Ferrous casting	Ferrous casting14	Moulding	Silicious dust	8	6	0.59	0.59	Singaporean	4	0.8
Ferrous casting	Ferrous casting14	Moulding	Silicious dust	8	6	0.6	0.6	Singaporean	4	0.8
Ferrous casting	Ferrous casting14	Moulding	Silicious dust	8	6	2.48	2.48	Singaporean	5	1
Ferrous casting	Ferrous casting14	Smelting	Other dust	8	6	2.1	0.26	Singaporean	2	0.4
Ferrous casting	Ferrous casting14	Casting	Other dust	8	6	1.6	0.2	Singaporean	2	0.4
Ferrous casting	Ferrous casting14	Sand stripping	Silicious dust	8	6	0.2	0.2	Singaporean	3	0.6
Ferrous casting	Ferrous casting14	Sand stripping	Silicious dust	8	6	0.2	0.2	Singaporean	3	0.6
Ferrous casting	Ferrous casting14	Sand stripping	Silicious dust	8	6	0.9	0.9	Singaporean	4	0.8
Ferrous casting	Ferrous casting15	Moulding	Silicious dust	8	6	0.4	0.4	Singaporean	3	0.6
Ferrous casting	Ferrous casting15	Moulding	Silicious dust	8	6	0.2	0.2	Singaporean	3	0.6
Ferrous casting	Ferrous casting15	Casting	Silicious dust	8	6	0.2	0.2	Singaporean	3	0.6
Ferrous casting	Ferrous casting15	Sand stripping	Silicious dust	8	6	0.4	0.4	Singaporean	3	0.6
Ferrous casting	Ferrous casting16	Moulding	Silicious dust	8	6	3.28	3.28	Singaporean	5	1
Ferrous casting	Ferrous casting16	Casting	Silicious dust	8	6	0.9	0.9	Singaporean	4	0.8
Ferrous casting	Ferrous casting16	Sand stripping	Silicious dust	8	6	7.1	7.1	Singaporean	5	1
Ferrous casting	Ferrous casting16	Shot blasting	Silicious dust	8	6	0.7	0.7	Singaporean	4	0.8
Ferrous casting	Ferrous casting17	Moulding	Silicious dust	8	6	0.72	0.72	Singaporean	4	0.8
Ferrous casting	Ferrous casting17	Moulding	Silicious dust	8	6	0.84	0.84	Singaporean	4	0.8
Ferrous casting	Ferrous casting17	Moulding	Silicious dust	8	6	0.92	0.92	Singaporean	4	0.8
Ferrous casting	Ferrous casting17	Moulding	Silicious dust	8	6	0.8	0.8	Singaporean	4	0.8
Ferrous casting	Ferrous casting17	Moulding	Silicious dust	8	6	0.76	0.76	Singaporean	4	0.8
Ferrous casting	Ferrous casting17	Moulding	Silicious dust	8	6	0.79	0.79	Singaporean	4	0.8
Ferrous casting	Ferrous casting17	Moulding	Silicious dust	8	6	0.81	0.81	Singaporean	4	0.8
Ferrous casting	Ferrous casting17	Moulding	Silicious dust	8	6	0.78	0.78	Singaporean	4	0.8
Ferrous casting	Ferrous casting17	Casting	Silicious dust	8	6	0.82	0.82	Singaporean	4	0.8
Ferrous casting	Ferrous casting17	Casting	Silicious dust	8	6	0.85	0.85	Singaporean	4	0.8
Ferrous casting	Ferrous casting17	Casting	Silicious dust	8	6	0.72	0.72	Singaporean	4	0.8
Ferrous casting	Ferrous casting17	Casting	Silicious dust	8	6	0.88	0.88	Singaporean	4	0.8
Ferrous casting	Ferrous casting17	Casting	Silicious dust	8	6	1.66	1.66	Singaporean	4	0.8
Ferrous casting	Ferrous casting17	Casting	Silicious dust	8	6	0.73	0.73	Singaporean	4	0.8
Ferrous casting	Ferrous casting17	Sand stripping	Silicious dust	8	6	0.87	0.87	Singaporean	4	0.8
Ferrous casting	Ferrous casting17	Sand stripping	Silicious dust	8	6	0.94	0.94	Singaporean	4	0.8
Ferrous casting	Ferrous casting17	Sand stripping	Silicious dust	8	6	0.65	0.65	Singaporean	4	0.8
Ferrous casting	Ferrous casting17	Sand stripping	Silicious dust	8	6	0.82	0.82	Singaporean	4	0.8
Ferrous casting	Ferrous casting17	Sand stripping	Silicious dust	8	6	0.85	0.85	Singaporean	4	0.8
Ferrous casting	Ferrous casting17	Sand stripping	Silicious dust	8	6	0.82	0.82	Singaporean	4	0.8
Ferrous casting	Ferrous casting17	Sand stripping	Silicious dust	8	6	0.4	0.4	Singaporean	3	0.6
Ferrous casting	Ferrous casting17	Shot blasting	Silicious dust	8	6	1.7	1.7	Singaporean	5	1
Ferrous casting	Ferrous casting1	Moulding	Silicious dust	8	6	0.2	0.4	COSHH	5	1
Ferrous casting	Ferrous casting1	Smelting	Other dust	8	6	0.25	0.06	COSHH	2	0.4
Ferrous casting	Ferrous casting1	Casting	Other dust	8	6	0.25	0.06	COSHH	2	0.4
Ferrous casting	Ferrous casting1	Sand stripping	Silicious dust	8	6	0.8	0.8	COSHH	5	1
Ferrous casting	Ferrous casting1	Shot blasting	Silicious dust	8	6	0.25	0.5	COSHH	5	1
Ferrous casting	Ferrous casting2	Moulding	Silicious dust	8	6	0.4	0.8	COSHH	5	1
Ferrous casting	Ferrous casting2	Smelting	Other dust	8	6	0.6	0.08	COSHH	2	0.4
Ferrous casting	Ferrous casting2	Casting	Other dust	8	6	0.6	0.08	COSHH	2	0.4
Ferrous casting	Ferrous casting2	Sand stripping	Silicious dust	8	6	0.15	0.15	COSHH	5	1
Ferrous casting	Ferrous casting2	Shot blasting	Silicious dust	8	6	6.8	13.6	COSHH	5	1
Ferrous casting	Ferrous casting3	Moulding	Silicious dust	8	6	3.6	7.2	COSHH	5	1
Ferrous casting	Ferrous casting3	Smelting	Other dust	8	6	0.2	0.05	COSHH	2	0.4
Ferrous casting	Ferrous casting3	Casting	Other dust	8	6	0.2	0.05	COSHH	2	0.4
Ferrous casting	Ferrous casting3	Sand stripping	Silicious dust	8	6	0.58	0.58	COSHH	5	1
Ferrous casting	Ferrous casting3	Shot blasting	Silicious dust	8	6	6.5	13	COSHH	5	1
Ferrous casting	Ferrous casting4	Moulding	Silicious dust	8	6	0.21	0.38	COSHH	5	1
Ferrous casting	Ferrous casting4	Moulding	Silicious dust	8	6	0.33	0.6	COSHH	5	1
Ferrous casting	Ferrous casting4	Moulding	Silicious dust	8	6	0.54	0.98	COSHH	5	1
Ferrous casting	Ferrous casting4	Casting	Other dust	8	6	0.12	0.03	COSHH	2	0.4
Ferrous casting	Ferrous casting5	Moulding	Silicious dust	8	6	0.58	1.05	COSHH	5	1
Ferrous casting	Ferrous casting5	Moulding	Silicious dust	8	6	0.45	0.82	COSHH	5	1
Ferrous casting	Ferrous casting5	Casting	Silicious dust	8	6	0.38	0.69	COSHH	5	1
Ferrous casting	Ferrous casting5	Sand stripping	Silicious dust	8	6	0.39	0.71	COSHH	5	1
Ferrous casting	Ferrous casting6	Moulding	Silicious dust	8	6	2.21	4.02	COSHH	5	1
Ferrous casting	Ferrous casting6	Moulding	Silicious dust	8	6	2.08	3.78	COSHH	5	1
Ferrous casting	Ferrous casting6	Moulding	Silicious dust	8	6	2.17	3.95	COSHH	5	1
Ferrous casting	Ferrous casting6	Casting	Silicious dust	8	6	0.42	0.76	COSHH	5	1
Ferrous casting	Ferrous casting6	Casting	Silicious dust	8	6	0.33	0.6	COSHH	5	1
Ferrous casting	Ferrous casting7	Moulding	Silicious dust	8	6	0.33	0.6	COSHH	5	1
Ferrous casting	Ferrous casting7	Smelting	Other dust	8	6	0.54	0.14	COSHH	2	0.4
Ferrous casting	Ferrous casting7	Casting	Silicious dust	8	6	0.21	0.38	COSHH	5	1
Ferrous casting	Ferrous casting8	Moulding	Silicious dust	8	6	0.88	1.6	COSHH	5	1
Ferrous casting	Ferrous casting8	Moulding	Silicious dust	8	6	0.83	1.51	COSHH	5	1
Ferrous casting	Ferrous casting8	Sand stripping	Silicious dust	8	6	0.25	0.45	COSHH	5	1
Ferrous casting	Ferrous casting9	Moulding	Silicious dust	8	6	0.67	0.96	COSHH	5	1
Ferrous casting	Ferrous casting9	Moulding	Silicious dust	8	6	0.71	1.01	COSHH	5	1
Ferrous casting	Ferrous casting9	Sand stripping	Silicious dust	8	6	1.38	1.97	COSHH	5	1
Ferrous casting	Ferrous casting9	Sand stripping	Silicious dust	8	6	0.79	1.13	COSHH	5	1
Ferrous casting	Ferrous casting10	Moulding	Silicious dust	8	6	4.3	4.3	COSHH	5	1
Ferrous casting	Ferrous casting10	Moulding	Silicious dust	8	6	4.6	4.6	COSHH	5	1
Ferrous casting	Ferrous casting10	Casting	Silicious dust	8	6	0.7	0.7	COSHH	5	1
Ferrous casting	Ferrous casting10	Sand stripping	Silicious dust	8	6	0.6	0.6	COSHH	5	1
Ferrous casting	Ferrous casting11	Moulding	Silicious dust	8	6	0.5	0.5	COSHH	5	1
Ferrous casting	Ferrous casting11	Moulding	Silicious dust	8	6	2	2	COSHH	5	1
Ferrous casting	Ferrous casting11	Sand stripping	Silicious dust	8	6	7.5	7.5	COSHH	5	1
Ferrous casting	Ferrous casting12	Moulding	Silicious dust	8	6	0.2	0.2	COSHH	5	1
Ferrous casting	Ferrous casting12	Moulding	Silicious dust	8	6	0.2	0.2	COSHH	5	1
Ferrous casting	Ferrous casting12	Moulding	Silicious dust	8	6	0.2	0.2	COSHH	5	1
Ferrous casting	Ferrous casting12	Sand stripping	Silicious dust	8	6	0.2	0.2	COSHH	5	1
Ferrous casting	Ferrous casting13	Moulding	Silicious dust	8	6	0.65	0.65	COSHH	5	1
Ferrous casting	Ferrous casting13	Moulding	Silicious dust	8	6	1.5	1.5	COSHH	5	1
Ferrous casting	Ferrous casting13	Moulding	Silicious dust	8	6	0.2	0.2	COSHH	5	1
Ferrous casting	Ferrous casting13	Moulding	Silicious dust	8	6	0.6	0.6	COSHH	5	1
Ferrous casting	Ferrous casting13	Moulding	Silicious dust	8	6	0.2	0.2	COSHH	5	1
Ferrous casting	Ferrous casting13	Smelting	Other dust	8	6	2.9	0.36	COSHH	2	0.4
Ferrous casting	Ferrous casting13	Casting	Other dust	8	6	1.4	0.18	COSHH	2	0.4
Ferrous casting	Ferrous casting13	Casting	Other dust	8	6	2.9	0.36	COSHH	2	0.4
Ferrous casting	Ferrous casting13	Sand stripping	Silicious dust	8	6	0.2	0.2	COSHH	5	1
Ferrous casting	Ferrous casting14	Moulding	Silicious dust	8	6	0.2	0.2	COSHH	5	1
Ferrous casting	Ferrous casting14	Moulding	Silicious dust	8	6	0.59	0.59	COSHH	5	1
Ferrous casting	Ferrous casting14	Moulding	Silicious dust	8	6	0.6	0.6	COSHH	5	1
Ferrous casting	Ferrous casting14	Moulding	Silicious dust	8	6	2.48	2.48	COSHH	5	1
Ferrous casting	Ferrous casting14	Smelting	Other dust	8	6	2.1	0.26	COSHH	2	0.4
Ferrous casting	Ferrous casting14	Casting	Other dust	8	6	1.6	0.2	COSHH	2	0.4
Ferrous casting	Ferrous casting14	Sand stripping	Silicious dust	8	6	0.2	0.2	COSHH	5	1
Ferrous casting	Ferrous casting14	Sand stripping	Silicious dust	8	6	0.2	0.2	COSHH	5	1
Ferrous casting	Ferrous casting14	Sand stripping	Silicious dust	8	6	0.9	0.9	COSHH	5	1
Ferrous casting	Ferrous casting15	Moulding	Silicious dust	8	6	0.4	0.4	COSHH	5	1
Ferrous casting	Ferrous casting15	Moulding	Silicious dust	8	6	0.2	0.2	COSHH	5	1
Ferrous casting	Ferrous casting15	Casting	Silicious dust	8	6	0.2	0.2	COSHH	5	1
Ferrous casting	Ferrous casting15	Sand stripping	Silicious dust	8	6	0.4	0.4	COSHH	5	1
Ferrous casting	Ferrous casting16	Moulding	Silicious dust	8	6	3.28	3.28	COSHH	5	1
Ferrous casting	Ferrous casting16	Casting	Silicious dust	8	6	0.9	0.9	COSHH	5	1
Ferrous casting	Ferrous casting16	Sand stripping	Silicious dust	8	6	7.1	7.1	COSHH	5	1
Ferrous casting	Ferrous casting16	Shot blasting	Silicious dust	8	6	0.7	0.7	COSHH	5	1
Ferrous casting	Ferrous casting17	Moulding	Silicious dust	8	6	0.72	0.72	COSHH	5	1
Ferrous casting	Ferrous casting17	Moulding	Silicious dust	8	6	0.84	0.84	COSHH	5	1
Ferrous casting	Ferrous casting17	Moulding	Silicious dust	8	6	0.92	0.92	COSHH	5	1
Ferrous casting	Ferrous casting17	Moulding	Silicious dust	8	6	0.8	0.8	COSHH	5	1
Ferrous casting	Ferrous casting17	Moulding	Silicious dust	8	6	0.76	0.76	COSHH	5	1
Ferrous casting	Ferrous casting17	Moulding	Silicious dust	8	6	0.79	0.79	COSHH	5	1
Ferrous casting	Ferrous casting17	Moulding	Silicious dust	8	6	0.81	0.81	COSHH	5	1
Ferrous casting	Ferrous casting17	Moulding	Silicious dust	8	6	0.78	0.78	COSHH	5	1
Ferrous casting	Ferrous casting17	Casting	Silicious dust	8	6	0.82	0.82	COSHH	5	1
Ferrous casting	Ferrous casting17	Casting	Silicious dust	8	6	0.85	0.85	COSHH	5	1
Ferrous casting	Ferrous casting17	Casting	Silicious dust	8	6	0.72	0.72	COSHH	5	1
Ferrous casting	Ferrous casting17	Casting	Silicious dust	8	6	0.88	0.88	COSHH	5	1
Ferrous casting	Ferrous casting17	Casting	Silicious dust	8	6	1.66	1.66	COSHH	5	1
Ferrous casting	Ferrous casting17	Casting	Silicious dust	8	6	0.73	0.73	COSHH	5	1
Ferrous casting	Ferrous casting17	Sand stripping	Silicious dust	8	6	0.87	0.87	COSHH	5	1
Ferrous casting	Ferrous casting17	Sand stripping	Silicious dust	8	6	0.94	0.94	COSHH	5	1
Ferrous casting	Ferrous casting17	Sand stripping	Silicious dust	8	6	0.65	0.65	COSHH	5	1
Ferrous casting	Ferrous casting17	Sand stripping	Silicious dust	8	6	0.82	0.82	COSHH	5	1
Ferrous casting	Ferrous casting17	Sand stripping	Silicious dust	8	6	0.85	0.85	COSHH	5	1
Ferrous casting	Ferrous casting17	Sand stripping	Silicious dust	8	6	0.82	0.82	COSHH	5	1
Ferrous casting	Ferrous casting17	Sand stripping	Silicious dust	8	6	0.4	0.4	COSHH	5	1
Ferrous casting	Ferrous casting17	Shot blasting	Silicious dust	8	6	1.7	1.7	COSHH	5	1
Ferrous casting	Ferrous casting1	Moulding	Silicious dust	8	6	0.2	0.4	Romanian	3	0.4
Ferrous casting	Ferrous casting1	Smelting	Other dust	8	6	0.25	0.06	Romanian	2	0.3
Ferrous casting	Ferrous casting1	Casting	Other dust	8	6	0.25	0.06	Romanian	2	0.3
Ferrous casting	Ferrous casting1	Sand stripping	Silicious dust	8	6	0.8	0.8	Romanian	3	0.4
Ferrous casting	Ferrous casting1	Shot blasting	Silicious dust	8	6	0.25	0.5	Romanian	3	0.4
Ferrous casting	Ferrous casting2	Moulding	Silicious dust	8	6	0.4	0.8	Romanian	3	0.4
Ferrous casting	Ferrous casting2	Smelting	Other dust	8	6	0.6	0.08	Romanian	2	0.3
Ferrous casting	Ferrous casting2	Casting	Other dust	8	6	0.6	0.08	Romanian	2	0.3
Ferrous casting	Ferrous casting2	Sand stripping	Silicious dust	8	6	0.15	0.15	Romanian	3	0.4
Ferrous casting	Ferrous casting2	Shot blasting	Silicious dust	8	6	6.8	13.6	Romanian	5	0.7
Ferrous casting	Ferrous casting3	Moulding	Silicious dust	8	6	3.6	7.2	Romanian	4	0.6
Ferrous casting	Ferrous casting3	Smelting	Other dust	8	6	0.2	0.05	Romanian	2	0.3
Ferrous casting	Ferrous casting3	Casting	Other dust	8	6	0.2	0.05	Romanian	2	0.3
Ferrous casting	Ferrous casting3	Sand stripping	Silicious dust	8	6	0.58	0.58	Romanian	3	0.4
Ferrous casting	Ferrous casting3	Shot blasting	Silicious dust	8	6	6.5	13	Romanian	5	0.7
Ferrous casting	Ferrous casting4	Moulding	Silicious dust	8	6	0.21	0.38	Romanian	3	0.4
Ferrous casting	Ferrous casting4	Moulding	Silicious dust	8	6	0.33	0.6	Romanian	3	0.4
Ferrous casting	Ferrous casting4	Moulding	Silicious dust	8	6	0.54	0.98	Romanian	3	0.4
Ferrous casting	Ferrous casting4	Casting	Other dust	8	6	0.12	0.03	Romanian	2	0.3
Ferrous casting	Ferrous casting5	Moulding	Silicious dust	8	6	0.58	1.05	Romanian	4	0.6
Ferrous casting	Ferrous casting5	Moulding	Silicious dust	8	6	0.45	0.82	Romanian	3	0.4
Ferrous casting	Ferrous casting5	Casting	Silicious dust	8	6	0.38	0.69	Romanian	3	0.4
Ferrous casting	Ferrous casting5	Sand stripping	Silicious dust	8	6	0.39	0.71	Romanian	3	0.4
Ferrous casting	Ferrous casting6	Moulding	Silicious dust	8	6	2.21	4.02	Romanian	4	0.6
Ferrous casting	Ferrous casting6	Moulding	Silicious dust	8	6	2.08	3.78	Romanian	4	0.6
Ferrous casting	Ferrous casting6	Moulding	Silicious dust	8	6	2.17	3.95	Romanian	4	0.6
Ferrous casting	Ferrous casting6	Casting	Silicious dust	8	6	0.42	0.76	Romanian	3	0.4
Ferrous casting	Ferrous casting6	Casting	Silicious dust	8	6	0.33	0.6	Romanian	3	0.4
Ferrous casting	Ferrous casting7	Moulding	Silicious dust	8	6	0.33	0.6	Romanian	3	0.4
Ferrous casting	Ferrous casting7	Smelting	Other dust	8	6	0.54	0.14	Romanian	2	0.3
Ferrous casting	Ferrous casting7	Casting	Silicious dust	8	6	0.21	0.38	Romanian	3	0.4
Ferrous casting	Ferrous casting8	Moulding	Silicious dust	8	6	0.88	1.6	Romanian	4	0.6
Ferrous casting	Ferrous casting8	Moulding	Silicious dust	8	6	0.83	1.51	Romanian	4	0.6
Ferrous casting	Ferrous casting8	Sand stripping	Silicious dust	8	6	0.25	0.45	Romanian	3	0.4
Ferrous casting	Ferrous casting9	Moulding	Silicious dust	8	6	0.67	0.96	Romanian	3	0.4
Ferrous casting	Ferrous casting9	Moulding	Silicious dust	8	6	0.71	1.01	Romanian	4	0.6
Ferrous casting	Ferrous casting9	Sand stripping	Silicious dust	8	6	1.38	1.97	Romanian	4	0.6
Ferrous casting	Ferrous casting9	Sand stripping	Silicious dust	8	6	0.79	1.13	Romanian	4	0.6
Ferrous casting	Ferrous casting10	Moulding	Silicious dust	8	6	4.3	4.3	Romanian	4	0.6
Ferrous casting	Ferrous casting10	Moulding	Silicious dust	8	6	4.6	4.6	Romanian	4	0.6
Ferrous casting	Ferrous casting10	Casting	Silicious dust	8	6	0.7	0.7	Romanian	3	0.4
Ferrous casting	Ferrous casting10	Sand stripping	Silicious dust	8	6	0.6	0.6	Romanian	3	0.4
Ferrous casting	Ferrous casting11	Moulding	Silicious dust	8	6	0.5	0.5	Romanian	3	0.4
Ferrous casting	Ferrous casting11	Moulding	Silicious dust	8	6	2	2	Romanian	4	0.6
Ferrous casting	Ferrous casting11	Sand stripping	Silicious dust	8	6	7.5	7.5	Romanian	4	0.6
Ferrous casting	Ferrous casting12	Moulding	Silicious dust	8	6	0.2	0.2	Romanian	3	0.4
Ferrous casting	Ferrous casting12	Moulding	Silicious dust	8	6	0.2	0.2	Romanian	3	0.4
Ferrous casting	Ferrous casting12	Moulding	Silicious dust	8	6	0.2	0.2	Romanian	3	0.4
Ferrous casting	Ferrous casting12	Sand stripping	Silicious dust	8	6	0.2	0.2	Romanian	3	0.4
Ferrous casting	Ferrous casting13	Moulding	Silicious dust	8	6	0.65	0.65	Romanian	3	0.4
Ferrous casting	Ferrous casting13	Moulding	Silicious dust	8	6	1.5	1.5	Romanian	4	0.6
Ferrous casting	Ferrous casting13	Moulding	Silicious dust	8	6	0.2	0.2	Romanian	3	0.4
Ferrous casting	Ferrous casting13	Moulding	Silicious dust	8	6	0.6	0.6	Romanian	3	0.4
Ferrous casting	Ferrous casting13	Moulding	Silicious dust	8	6	0.2	0.2	Romanian	3	0.4
Ferrous casting	Ferrous casting13	Smelting	Other dust	8	6	2.9	0.36	Romanian	2	0.3
Ferrous casting	Ferrous casting13	Casting	Other dust	8	6	1.4	0.18	Romanian	2	0.3
Ferrous casting	Ferrous casting13	Casting	Other dust	8	6	2.9	0.36	Romanian	2	0.3
Ferrous casting	Ferrous casting13	Sand stripping	Silicious dust	8	6	0.2	0.2	Romanian	3	0.4
Ferrous casting	Ferrous casting14	Moulding	Silicious dust	8	6	0.2	0.2	Romanian	3	0.4
Ferrous casting	Ferrous casting14	Moulding	Silicious dust	8	6	0.59	0.59	Romanian	3	0.4
Ferrous casting	Ferrous casting14	Moulding	Silicious dust	8	6	0.6	0.6	Romanian	3	0.4
Ferrous casting	Ferrous casting14	Moulding	Silicious dust	8	6	2.48	2.48	Romanian	4	0.6
Ferrous casting	Ferrous casting14	Smelting	Other dust	8	6	2.1	0.26	Romanian	2	0.3
Ferrous casting	Ferrous casting14	Casting	Other dust	8	6	1.6	0.2	Romanian	2	0.3
Ferrous casting	Ferrous casting14	Sand stripping	Silicious dust	8	6	0.2	0.2	Romanian	3	0.4
Ferrous casting	Ferrous casting14	Sand stripping	Silicious dust	8	6	0.2	0.2	Romanian	3	0.4
Ferrous casting	Ferrous casting14	Sand stripping	Silicious dust	8	6	0.9	0.9	Romanian	3	0.4
Ferrous casting	Ferrous casting15	Moulding	Silicious dust	8	6	0.4	0.4	Romanian	3	0.4
Ferrous casting	Ferrous casting15	Moulding	Silicious dust	8	6	0.2	0.2	Romanian	3	0.4
Ferrous casting	Ferrous casting15	Casting	Silicious dust	8	6	0.2	0.2	Romanian	3	0.4
Ferrous casting	Ferrous casting15	Sand stripping	Silicious dust	8	6	0.4	0.4	Romanian	3	0.4
Ferrous casting	Ferrous casting16	Moulding	Silicious dust	8	6	3.28	3.28	Romanian	4	0.6
Ferrous casting	Ferrous casting16	Casting	Silicious dust	8	6	0.9	0.9	Romanian	3	0.4
Ferrous casting	Ferrous casting16	Sand stripping	Silicious dust	8	6	7.1	7.1	Romanian	4	0.6
Ferrous casting	Ferrous casting16	Shot blasting	Silicious dust	8	6	0.7	0.7	Romanian	3	0.4
Ferrous casting	Ferrous casting17	Moulding	Silicious dust	8	6	0.72	0.72	Romanian	3	0.4
Ferrous casting	Ferrous casting17	Moulding	Silicious dust	8	6	0.84	0.84	Romanian	3	0.4
Ferrous casting	Ferrous casting17	Moulding	Silicious dust	8	6	0.92	0.92	Romanian	3	0.4
Ferrous casting	Ferrous casting17	Moulding	Silicious dust	8	6	0.8	0.8	Romanian	3	0.4
Ferrous casting	Ferrous casting17	Moulding	Silicious dust	8	6	0.76	0.76	Romanian	3	0.4
Ferrous casting	Ferrous casting17	Moulding	Silicious dust	8	6	0.79	0.79	Romanian	3	0.4
Ferrous casting	Ferrous casting17	Moulding	Silicious dust	8	6	0.81	0.81	Romanian	3	0.4
Ferrous casting	Ferrous casting17	Moulding	Silicious dust	8	6	0.78	0.78	Romanian	3	0.4
Ferrous casting	Ferrous casting17	Casting	Silicious dust	8	6	0.82	0.82	Romanian	3	0.4
Ferrous casting	Ferrous casting17	Casting	Silicious dust	8	6	0.85	0.85	Romanian	3	0.4
Ferrous casting	Ferrous casting17	Casting	Silicious dust	8	6	0.72	0.72	Romanian	3	0.4
Ferrous casting	Ferrous casting17	Casting	Silicious dust	8	6	0.88	0.88	Romanian	3	0.4
Ferrous casting	Ferrous casting17	Casting	Silicious dust	8	6	1.66	1.66	Romanian	4	0.6
Ferrous casting	Ferrous casting17	Casting	Silicious dust	8	6	0.73	0.73	Romanian	3	0.4
Ferrous casting	Ferrous casting17	Sand stripping	Silicious dust	8	6	0.87	0.87	Romanian	3	0.4
Ferrous casting	Ferrous casting17	Sand stripping	Silicious dust	8	6	0.94	0.94	Romanian	3	0.4
Ferrous casting	Ferrous casting17	Sand stripping	Silicious dust	8	6	0.65	0.65	Romanian	3	0.4
Ferrous casting	Ferrous casting17	Sand stripping	Silicious dust	8	6	0.82	0.82	Romanian	3	0.4
Ferrous casting	Ferrous casting17	Sand stripping	Silicious dust	8	6	0.85	0.85	Romanian	3	0.4
Ferrous casting	Ferrous casting17	Sand stripping	Silicious dust	8	6	0.82	0.82	Romanian	3	0.4
Ferrous casting	Ferrous casting17	Sand stripping	Silicious dust	8	6	0.4	0.4	Romanian	3	0.4
Ferrous casting	Ferrous casting17	Shot blasting	Silicious dust	8	6	1.7	1.7	Romanian	4	0.6
Ferrous casting	Ferrous casting1	Moulding	Silicious dust	8	6	0.2	0.4	Australian	3	0.6
Ferrous casting	Ferrous casting1	Smelting	Other dust	8	6	0.25	0.06	Australian	2	0.4
Ferrous casting	Ferrous casting1	Casting	Other dust	8	6	0.25	0.06	Australian	2	0.4
Ferrous casting	Ferrous casting1	Sand stripping	Silicious dust	8	6	0.8	0.8	Australian	3	0.6
Ferrous casting	Ferrous casting1	Shot blasting	Silicious dust	8	6	0.25	0.5	Australian	3	0.6
Ferrous casting	Ferrous casting2	Moulding	Silicious dust	8	6	0.4	0.8	Australian	3	0.6
Ferrous casting	Ferrous casting2	Smelting	Other dust	8	6	0.6	0.08	Australian	2	0.4
Ferrous casting	Ferrous casting2	Casting	Other dust	8	6	0.6	0.08	Australian	2	0.4
Ferrous casting	Ferrous casting2	Sand stripping	Silicious dust	8	6	0.15	0.15	Australian	3	0.6
Ferrous casting	Ferrous casting2	Shot blasting	Silicious dust	8	6	6.8	13.6	Australian	4	0.8
Ferrous casting	Ferrous casting3	Moulding	Silicious dust	8	6	3.6	7.2	Australian	4	0.8
Ferrous casting	Ferrous casting3	Smelting	Other dust	8	6	0.2	0.05	Australian	2	0.4
Ferrous casting	Ferrous casting3	Casting	Other dust	8	6	0.2	0.05	Australian	2	0.4
Ferrous casting	Ferrous casting3	Sand stripping	Silicious dust	8	6	0.58	0.58	Australian	3	0.6
Ferrous casting	Ferrous casting3	Shot blasting	Silicious dust	8	6	6.5	13	Australian	4	0.8
Ferrous casting	Ferrous casting4	Moulding	Silicious dust	8	6	0.21	0.38	Australian	3	0.6
Ferrous casting	Ferrous casting4	Moulding	Silicious dust	8	6	0.33	0.6	Australian	3	0.6
Ferrous casting	Ferrous casting4	Moulding	Silicious dust	8	6	0.54	0.98	Australian	3	0.6
Ferrous casting	Ferrous casting4	Casting	Other dust	8	6	0.12	0.03	Australian	2	0.4
Ferrous casting	Ferrous casting5	Moulding	Silicious dust	8	6	0.58	1.05	Australian	4	0.8
Ferrous casting	Ferrous casting5	Moulding	Silicious dust	8	6	0.45	0.82	Australian	3	0.6
Ferrous casting	Ferrous casting5	Casting	Silicious dust	8	6	0.38	0.69	Australian	3	0.6
Ferrous casting	Ferrous casting5	Sand stripping	Silicious dust	8	6	0.39	0.71	Australian	3	0.6
Ferrous casting	Ferrous casting6	Moulding	Silicious dust	8	6	2.21	4.02	Australian	4	0.8
Ferrous casting	Ferrous casting6	Moulding	Silicious dust	8	6	2.08	3.78	Australian	4	0.8
Ferrous casting	Ferrous casting6	Moulding	Silicious dust	8	6	2.17	3.95	Australian	4	0.8
Ferrous casting	Ferrous casting6	Casting	Silicious dust	8	6	0.42	0.76	Australian	3	0.6
Ferrous casting	Ferrous casting6	Casting	Silicious dust	8	6	0.33	0.6	Australian	3	0.6
Ferrous casting	Ferrous casting7	Moulding	Silicious dust	8	6	0.33	0.6	Australian	3	0.6
Ferrous casting	Ferrous casting7	Smelting	Other dust	8	6	0.54	0.14	Australian	3	0.6
Ferrous casting	Ferrous casting7	Casting	Silicious dust	8	6	0.21	0.38	Australian	3	0.6
Ferrous casting	Ferrous casting8	Moulding	Silicious dust	8	6	0.88	1.6	Australian	4	0.8
Ferrous casting	Ferrous casting8	Moulding	Silicious dust	8	6	0.83	1.51	Australian	4	0.8
Ferrous casting	Ferrous casting8	Sand stripping	Silicious dust	8	6	0.25	0.45	Australian	3	0.6
Ferrous casting	Ferrous casting9	Moulding	Silicious dust	8	6	0.67	0.96	Australian	3	0.6
Ferrous casting	Ferrous casting9	Moulding	Silicious dust	8	6	0.71	1.01	Australian	4	0.8
Ferrous casting	Ferrous casting9	Sand stripping	Silicious dust	8	6	1.38	1.97	Australian	4	0.8
Ferrous casting	Ferrous casting9	Sand stripping	Silicious dust	8	6	0.79	1.13	Australian	4	0.8
Ferrous casting	Ferrous casting10	Moulding	Silicious dust	8	6	4.3	4.3	Australian	4	0.8
Ferrous casting	Ferrous casting10	Moulding	Silicious dust	8	6	4.6	4.6	Australian	4	0.8
Ferrous casting	Ferrous casting10	Casting	Silicious dust	8	6	0.7	0.7	Australian	3	0.6
Ferrous casting	Ferrous casting10	Sand stripping	Silicious dust	8	6	0.6	0.6	Australian	3	0.6
Ferrous casting	Ferrous casting11	Moulding	Silicious dust	8	6	0.5	0.5	Australian	3	0.6
Ferrous casting	Ferrous casting11	Moulding	Silicious dust	8	6	2	2	Australian	4	0.8
Ferrous casting	Ferrous casting11	Sand stripping	Silicious dust	8	6	7.5	7.5	Australian	4	0.8
Ferrous casting	Ferrous casting12	Moulding	Silicious dust	8	6	0.2	0.2	Australian	3	0.6
Ferrous casting	Ferrous casting12	Moulding	Silicious dust	8	6	0.2	0.2	Australian	3	0.6
Ferrous casting	Ferrous casting12	Moulding	Silicious dust	8	6	0.2	0.2	Australian	3	0.6
Ferrous casting	Ferrous casting12	Sand stripping	Silicious dust	8	6	0.2	0.2	Australian	3	0.6
Ferrous casting	Ferrous casting13	Moulding	Silicious dust	8	6	0.65	0.65	Australian	3	0.6
Ferrous casting	Ferrous casting13	Moulding	Silicious dust	8	6	1.5	1.5	Australian	4	0.8
Ferrous casting	Ferrous casting13	Moulding	Silicious dust	8	6	0.2	0.2	Australian	3	0.6
Ferrous casting	Ferrous casting13	Moulding	Silicious dust	8	6	0.6	0.6	Australian	3	0.6
Ferrous casting	Ferrous casting13	Moulding	Silicious dust	8	6	0.2	0.2	Australian	3	0.6
Ferrous casting	Ferrous casting13	Smelting	Other dust	8	6	2.9	0.36	Australian	3	0.6
Ferrous casting	Ferrous casting13	Casting	Other dust	8	6	1.4	0.18	Australian	3	0.6
Ferrous casting	Ferrous casting13	Casting	Other dust	8	6	2.9	0.36	Australian	3	0.6
Ferrous casting	Ferrous casting13	Sand stripping	Silicious dust	8	6	0.2	0.2	Australian	3	0.6
Ferrous casting	Ferrous casting14	Moulding	Silicious dust	8	6	0.2	0.2	Australian	3	0.6
Ferrous casting	Ferrous casting14	Moulding	Silicious dust	8	6	0.59	0.59	Australian	3	0.6
Ferrous casting	Ferrous casting14	Moulding	Silicious dust	8	6	0.6	0.6	Australian	3	0.6
Ferrous casting	Ferrous casting14	Moulding	Silicious dust	8	6	2.48	2.48	Australian	4	0.8
Ferrous casting	Ferrous casting14	Smelting	Other dust	8	6	2.1	0.26	Australian	3	0.6
Ferrous casting	Ferrous casting14	Casting	Other dust	8	6	1.6	0.2	Australian	3	0.6
Ferrous casting	Ferrous casting14	Sand stripping	Silicious dust	8	6	0.2	0.2	Australian	3	0.6
Ferrous casting	Ferrous casting14	Sand stripping	Silicious dust	8	6	0.2	0.2	Australian	3	0.6
Ferrous casting	Ferrous casting14	Sand stripping	Silicious dust	8	6	0.9	0.9	Australian	3	0.6
Ferrous casting	Ferrous casting15	Moulding	Silicious dust	8	6	0.4	0.4	Australian	3	0.6
Ferrous casting	Ferrous casting15	Moulding	Silicious dust	8	6	0.2	0.2	Australian	3	0.6
Ferrous casting	Ferrous casting15	Casting	Silicious dust	8	6	0.2	0.2	Australian	3	0.6
Ferrous casting	Ferrous casting15	Sand stripping	Silicious dust	8	6	0.4	0.4	Australian	3	0.6
Ferrous casting	Ferrous casting16	Moulding	Silicious dust	8	6	3.28	3.28	Australian	4	0.8
Ferrous casting	Ferrous casting16	Casting	Silicious dust	8	6	0.9	0.9	Australian	3	0.6
Ferrous casting	Ferrous casting16	Sand stripping	Silicious dust	8	6	7.1	7.1	Australian	4	0.8
Ferrous casting	Ferrous casting16	Shot blasting	Silicious dust	8	6	0.7	0.7	Australian	3	0.6
Ferrous casting	Ferrous casting17	Moulding	Silicious dust	8	6	0.72	0.72	Australian	3	0.6
Ferrous casting	Ferrous casting17	Moulding	Silicious dust	8	6	0.84	0.84	Australian	3	0.6
Ferrous casting	Ferrous casting17	Moulding	Silicious dust	8	6	0.92	0.92	Australian	3	0.6
Ferrous casting	Ferrous casting17	Moulding	Silicious dust	8	6	0.8	0.8	Australian	3	0.6
Ferrous casting	Ferrous casting17	Moulding	Silicious dust	8	6	0.76	0.76	Australian	3	0.6
Ferrous casting	Ferrous casting17	Moulding	Silicious dust	8	6	0.79	0.79	Australian	3	0.6
Ferrous casting	Ferrous casting17	Moulding	Silicious dust	8	6	0.81	0.81	Australian	3	0.6
Ferrous casting	Ferrous casting17	Moulding	Silicious dust	8	6	0.78	0.78	Australian	3	0.6
Ferrous casting	Ferrous casting17	Casting	Silicious dust	8	6	0.82	0.82	Australian	3	0.6
Ferrous casting	Ferrous casting17	Casting	Silicious dust	8	6	0.85	0.85	Australian	3	0.6
Ferrous casting	Ferrous casting17	Casting	Silicious dust	8	6	0.72	0.72	Australian	3	0.6
Ferrous casting	Ferrous casting17	Casting	Silicious dust	8	6	0.88	0.88	Australian	3	0.6
Ferrous casting	Ferrous casting17	Casting	Silicious dust	8	6	1.66	1.66	Australian	4	0.8
Ferrous casting	Ferrous casting17	Casting	Silicious dust	8	6	0.73	0.73	Australian	3	0.6
Ferrous casting	Ferrous casting17	Sand stripping	Silicious dust	8	6	0.87	0.87	Australian	3	0.6
Ferrous casting	Ferrous casting17	Sand stripping	Silicious dust	8	6	0.94	0.94	Australian	3	0.6
Ferrous casting	Ferrous casting17	Sand stripping	Silicious dust	8	6	0.65	0.65	Australian	3	0.6
Ferrous casting	Ferrous casting17	Sand stripping	Silicious dust	8	6	0.82	0.82	Australian	3	0.6
Ferrous casting	Ferrous casting17	Sand stripping	Silicious dust	8	6	0.85	0.85	Australian	3	0.6
Ferrous casting	Ferrous casting17	Sand stripping	Silicious dust	8	6	0.82	0.82	Australian	3	0.6
Ferrous casting	Ferrous casting17	Sand stripping	Silicious dust	8	6	0.4	0.4	Australian	3	0.6
Ferrous casting	Ferrous casting17	Shot blasting	Silicious dust	8	6	1.7	1.7	Australian	4	0.8
Ferrous casting	Ferrous casting1	Moulding	Silicious dust	8	6	0.2	0.4	ICMM	5	1
Ferrous casting	Ferrous casting1	Smelting	Other dust	8	6	0.25	0.06	ICMM	4	0.8
Ferrous casting	Ferrous casting1	Casting	Other dust	8	6	0.25	0.06	ICMM	4	0.8
Ferrous casting	Ferrous casting1	Sand stripping	Silicious dust	8	6	0.8	0.8	ICMM	5	1
Ferrous casting	Ferrous casting1	Shot blasting	Silicious dust	8	6	0.25	0.5	ICMM	5	1
Ferrous casting	Ferrous casting2	Moulding	Silicious dust	8	6	0.4	0.8	ICMM	5	1
Ferrous casting	Ferrous casting2	Smelting	Other dust	8	6	0.6	0.08	ICMM	4	0.8
Ferrous casting	Ferrous casting2	Casting	Other dust	8	6	0.6	0.08	ICMM	4	0.8
Ferrous casting	Ferrous casting2	Sand stripping	Silicious dust	8	6	0.15	0.15	ICMM	5	1
Ferrous casting	Ferrous casting2	Shot blasting	Silicious dust	8	6	6.8	13.6	ICMM	5	1
Ferrous casting	Ferrous casting3	Moulding	Silicious dust	8	6	3.6	7.2	ICMM	5	1
Ferrous casting	Ferrous casting3	Smelting	Other dust	8	6	0.2	0.05	ICMM	4	0.8
Ferrous casting	Ferrous casting3	Casting	Other dust	8	6	0.2	0.05	ICMM	4	0.8
Ferrous casting	Ferrous casting3	Sand stripping	Silicious dust	8	6	0.58	0.58	ICMM	5	1
Ferrous casting	Ferrous casting3	Shot blasting	Silicious dust	8	6	6.5	13	ICMM	5	1
Ferrous casting	Ferrous casting4	Moulding	Silicious dust	8	6	0.21	0.38	ICMM	5	1
Ferrous casting	Ferrous casting4	Moulding	Silicious dust	8	6	0.33	0.6	ICMM	5	1
Ferrous casting	Ferrous casting4	Moulding	Silicious dust	8	6	0.54	0.98	ICMM	5	1
Ferrous casting	Ferrous casting4	Casting	Other dust	8	6	0.12	0.03	ICMM	4	0.8
Ferrous casting	Ferrous casting5	Moulding	Silicious dust	8	6	0.58	1.05	ICMM	5	1
Ferrous casting	Ferrous casting5	Moulding	Silicious dust	8	6	0.45	0.82	ICMM	5	1
Ferrous casting	Ferrous casting5	Casting	Silicious dust	8	6	0.38	0.69	ICMM	5	1
Ferrous casting	Ferrous casting5	Sand stripping	Silicious dust	8	6	0.39	0.71	ICMM	5	1
Ferrous casting	Ferrous casting6	Moulding	Silicious dust	8	6	2.21	4.02	ICMM	5	1
Ferrous casting	Ferrous casting6	Moulding	Silicious dust	8	6	2.08	3.78	ICMM	5	1
Ferrous casting	Ferrous casting6	Moulding	Silicious dust	8	6	2.17	3.95	ICMM	5	1
Ferrous casting	Ferrous casting6	Casting	Silicious dust	8	6	0.42	0.76	ICMM	5	1
Ferrous casting	Ferrous casting6	Casting	Silicious dust	8	6	0.33	0.6	ICMM	5	1
Ferrous casting	Ferrous casting7	Moulding	Silicious dust	8	6	0.33	0.6	ICMM	5	1
Ferrous casting	Ferrous casting7	Smelting	Other dust	8	6	0.54	0.14	ICMM	5	1
Ferrous casting	Ferrous casting7	Casting	Silicious dust	8	6	0.21	0.38	ICMM	5	1
Ferrous casting	Ferrous casting8	Moulding	Silicious dust	8	6	0.88	1.6	ICMM	5	1
Ferrous casting	Ferrous casting8	Moulding	Silicious dust	8	6	0.83	1.51	ICMM	5	1
Ferrous casting	Ferrous casting8	Sand stripping	Silicious dust	8	6	0.25	0.45	ICMM	5	1
Ferrous casting	Ferrous casting9	Moulding	Silicious dust	8	6	0.67	0.96	ICMM	5	1
Ferrous casting	Ferrous casting9	Moulding	Silicious dust	8	6	0.71	1.01	ICMM	5	1
Ferrous casting	Ferrous casting9	Sand stripping	Silicious dust	8	6	1.38	1.97	ICMM	5	1
Ferrous casting	Ferrous casting9	Sand stripping	Silicious dust	8	6	0.79	1.13	ICMM	5	1
Ferrous casting	Ferrous casting10	Moulding	Silicious dust	8	6	4.3	4.3	ICMM	5	1
Ferrous casting	Ferrous casting10	Moulding	Silicious dust	8	6	4.6	4.6	ICMM	5	1
Ferrous casting	Ferrous casting10	Casting	Silicious dust	8	6	0.7	0.7	ICMM	5	1
Ferrous casting	Ferrous casting10	Sand stripping	Silicious dust	8	6	0.6	0.6	ICMM	5	1
Ferrous casting	Ferrous casting11	Moulding	Silicious dust	8	6	0.5	0.5	ICMM	5	1
Ferrous casting	Ferrous casting11	Moulding	Silicious dust	8	6	2	2	ICMM	5	1
Ferrous casting	Ferrous casting11	Sand stripping	Silicious dust	8	6	7.5	7.5	ICMM	5	1
Ferrous casting	Ferrous casting12	Moulding	Silicious dust	8	6	0.2	0.2	ICMM	5	1
Ferrous casting	Ferrous casting12	Moulding	Silicious dust	8	6	0.2	0.2	ICMM	5	1
Ferrous casting	Ferrous casting12	Moulding	Silicious dust	8	6	0.2	0.2	ICMM	5	1
Ferrous casting	Ferrous casting12	Sand stripping	Silicious dust	8	6	0.2	0.2	ICMM	5	1
Ferrous casting	Ferrous casting13	Moulding	Silicious dust	8	6	0.65	0.65	ICMM	5	1
Ferrous casting	Ferrous casting13	Moulding	Silicious dust	8	6	1.5	1.5	ICMM	5	1
Ferrous casting	Ferrous casting13	Moulding	Silicious dust	8	6	0.2	0.2	ICMM	5	1
Ferrous casting	Ferrous casting13	Moulding	Silicious dust	8	6	0.6	0.6	ICMM	5	1
Ferrous casting	Ferrous casting13	Moulding	Silicious dust	8	6	0.2	0.2	ICMM	5	1
Ferrous casting	Ferrous casting13	Smelting	Other dust	8	6	2.9	0.36	ICMM	5	1
Ferrous casting	Ferrous casting13	Casting	Other dust	8	6	1.4	0.18	ICMM	5	1
Ferrous casting	Ferrous casting13	Casting	Other dust	8	6	2.9	0.36	ICMM	5	1
Ferrous casting	Ferrous casting13	Sand stripping	Silicious dust	8	6	0.2	0.2	ICMM	5	1
Ferrous casting	Ferrous casting14	Moulding	Silicious dust	8	6	0.2	0.2	ICMM	5	1
Ferrous casting	Ferrous casting14	Moulding	Silicious dust	8	6	0.59	0.59	ICMM	5	1
Ferrous casting	Ferrous casting14	Moulding	Silicious dust	8	6	0.6	0.6	ICMM	5	1
Ferrous casting	Ferrous casting14	Moulding	Silicious dust	8	6	2.48	2.48	ICMM	5	1
Ferrous casting	Ferrous casting14	Smelting	Other dust	8	6	2.1	0.26	ICMM	5	1
Ferrous casting	Ferrous casting14	Casting	Other dust	8	6	1.6	0.2	ICMM	5	1
Ferrous casting	Ferrous casting14	Sand stripping	Silicious dust	8	6	0.2	0.2	ICMM	5	1
Ferrous casting	Ferrous casting14	Sand stripping	Silicious dust	8	6	0.2	0.2	ICMM	5	1
Ferrous casting	Ferrous casting14	Sand stripping	Silicious dust	8	6	0.9	0.9	ICMM	5	1
Ferrous casting	Ferrous casting15	Moulding	Silicious dust	8	6	0.4	0.4	ICMM	5	1
Ferrous casting	Ferrous casting15	Moulding	Silicious dust	8	6	0.2	0.2	ICMM	5	1
Ferrous casting	Ferrous casting15	Casting	Silicious dust	8	6	0.2	0.2	ICMM	5	1
Ferrous casting	Ferrous casting15	Sand stripping	Silicious dust	8	6	0.4	0.4	ICMM	5	1
Ferrous casting	Ferrous casting16	Moulding	Silicious dust	8	6	3.28	3.28	ICMM	5	1
Ferrous casting	Ferrous casting16	Casting	Silicious dust	8	6	0.9	0.9	ICMM	5	1
Ferrous casting	Ferrous casting16	Sand stripping	Silicious dust	8	6	7.1	7.1	ICMM	5	1
Ferrous casting	Ferrous casting16	Shot blasting	Silicious dust	8	6	0.7	0.7	ICMM	5	1
Ferrous casting	Ferrous casting17	Moulding	Silicious dust	8	6	0.72	0.72	ICMM	5	1
Ferrous casting	Ferrous casting17	Moulding	Silicious dust	8	6	0.84	0.84	ICMM	5	1
Ferrous casting	Ferrous casting17	Moulding	Silicious dust	8	6	0.92	0.92	ICMM	5	1
Ferrous casting	Ferrous casting17	Moulding	Silicious dust	8	6	0.8	0.8	ICMM	5	1
Ferrous casting	Ferrous casting17	Moulding	Silicious dust	8	6	0.76	0.76	ICMM	5	1
Ferrous casting	Ferrous casting17	Moulding	Silicious dust	8	6	0.79	0.79	ICMM	5	1
Ferrous casting	Ferrous casting17	Moulding	Silicious dust	8	6	0.81	0.81	ICMM	5	1
Ferrous casting	Ferrous casting17	Moulding	Silicious dust	8	6	0.78	0.78	ICMM	5	1
Ferrous casting	Ferrous casting17	Casting	Silicious dust	8	6	0.82	0.82	ICMM	5	1
Ferrous casting	Ferrous casting17	Casting	Silicious dust	8	6	0.85	0.85	ICMM	5	1
Ferrous casting	Ferrous casting17	Casting	Silicious dust	8	6	0.72	0.72	ICMM	5	1
Ferrous casting	Ferrous casting17	Casting	Silicious dust	8	6	0.88	0.88	ICMM	5	1
Ferrous casting	Ferrous casting17	Casting	Silicious dust	8	6	1.66	1.66	ICMM	5	1
Ferrous casting	Ferrous casting17	Casting	Silicious dust	8	6	0.73	0.73	ICMM	5	1
Ferrous casting	Ferrous casting17	Sand stripping	Silicious dust	8	6	0.87	0.87	ICMM	5	1
Ferrous casting	Ferrous casting17	Sand stripping	Silicious dust	8	6	0.94	0.94	ICMM	5	1
Ferrous casting	Ferrous casting17	Sand stripping	Silicious dust	8	6	0.65	0.65	ICMM	5	1
Ferrous casting	Ferrous casting17	Sand stripping	Silicious dust	8	6	0.82	0.82	ICMM	5	1
Ferrous casting	Ferrous casting17	Sand stripping	Silicious dust	8	6	0.85	0.85	ICMM	5	1
Ferrous casting	Ferrous casting17	Sand stripping	Silicious dust	8	6	0.82	0.82	ICMM	5	1
Ferrous casting	Ferrous casting17	Sand stripping	Silicious dust	8	6	0.4	0.4	ICMM	5	1
Ferrous casting	Ferrous casting17	Shot blasting	Silicious dust	8	6	1.7	1.7	ICMM	5	1
Ship repairs	Ship repairs1	Electrowelding	Welding fume	7	6	4.6	1.15	EPA	#NULL!	#NULL!
Ship repairs	Ship repairs1	Electrowelding	Welding fume	7	6	9.6	2.4	EPA	#NULL!	#NULL!
Ship repairs	Ship repairs1	Electrowelding	Welding fume	7	6	7.1	1.775	EPA	#NULL!	#NULL!
Ship repairs	Ship repairs1	Electrowelding	Welding fume	7	6	0.6	0.15	EPA	#NULL!	#NULL!
Ship repairs	Ship repairs1	Electrowelding	Welding fume	7	6	0.7	0.175	EPA	#NULL!	#NULL!
Ship repairs	Ship repairs1	Electrowelding	Welding fume	7	6	8.1	2.025	EPA	#NULL!	#NULL!
Ship repairs	Ship repairs1	Electrowelding	Welding fume	7	6	4.2	1.05	EPA	#NULL!	#NULL!
Ship repairs	Ship repairs1	Electrowelding	Welding fume	7	6	3.3	0.825	EPA	#NULL!	#NULL!
Ship repairs	Ship repairs1	Electrowelding	Manganese and inorganic compounds	7	6	0.41	2.73333	EPA	5	1
Ship repairs	Ship repairs1	Electrowelding	Manganese and inorganic compounds	7	6	0.01	0.0666667	EPA	5	1
Ship repairs	Ship repairs1	Electrowelding	Manganese and inorganic compounds	7	6	0.03	0.2	EPA	5	1
Ship repairs	Ship repairs1	Electrowelding	Manganese and inorganic compounds	7	6	0.08	0.533333	EPA	5	1
Ship repairs	Ship repairs1	Electrowelding	Manganese and inorganic compounds	7	6	0.08	0.533333	EPA	5	1
Ship repairs	Ship repairs1	Electrowelding	Manganese and inorganic compounds	7	6	0.05	0.333333	EPA	5	1
Ship repairs	Ship repairs1	Electrowelding	Manganese and inorganic compounds	7	6	0.03	0.2	EPA	5	1
Ship repairs	Ship repairs1	Electrowelding	Manganese and inorganic compounds	7	6	0.01	0.0666667	EPA	5	1
Ship repairs	Ship repairs1	Electrowelding	Nitrogen oxides	7	6	0.08	0.016	EPA	#NULL!	#NULL!
Ship repairs	Ship repairs1	Electrowelding	Nitrogen oxides	7	6	0.08	0.016	EPA	#NULL!	#NULL!
Ship repairs	Ship repairs1	Electrowelding	Nitrogen oxides	7	6	0.07	0.014	EPA	#NULL!	#NULL!
Ship repairs	Ship repairs1	Electrowelding	Nitrogen oxides	7	6	0.1	0.02	EPA	#NULL!	#NULL!
Ship repairs	Ship repairs1	Electrowelding	Nitrogen oxides	7	6	0.1	0.02	EPA	#NULL!	#NULL!
Ship repairs	Ship repairs1	Electrowelding	Nitrogen oxides	7	6	0.11	0.022	EPA	#NULL!	#NULL!
Ship repairs	Ship repairs1	Electrowelding	Nitrogen oxides	7	6	0.08	0.016	EPA	#NULL!	#NULL!
Ship repairs	Ship repairs1	Electrowelding	Nitrogen oxides	7	6	0.1	0.02	EPA	#NULL!	#NULL!
Ship repairs	Ship repairs1	Electrowelding	Nitrogen oxides	7	6	0.08	0.016	EPA	#NULL!	#NULL!
Ship repairs	Ship repairs1	Electrowelding	Nitrogen oxides	7	6	0.12	0.024	EPA	#NULL!	#NULL!
Ship repairs	Ship repairs1	Polishing	Grinding wheel dust	7	6	4.5	0.5625	EPA	#NULL!	#NULL!
Ship repairs	Ship repairs1	Polishing	Grinding wheel dust	7	6	1.9	0.2375	EPA	#NULL!	#NULL!
Ship repairs	Ship repairs1	Polishing	Grinding wheel dust	7	6	0.4	0.05	EPA	#NULL!	#NULL!
Ship repairs	Ship repairs1	Polishing	Grinding wheel dust	7	6	2.1	0.2625	EPA	#NULL!	#NULL!
Ship repairs	Ship repairs1	Polishing	Grinding wheel dust	7	6	3.6	0.45	EPA	#NULL!	#NULL!
Ship repairs	Ship repairs1	Spraying	Benzene	7	6	0.3	0.05	EPA	2	0.4
Ship repairs	Ship repairs1	Spraying	Benzene	7	6	0.3	0.05	EPA	2	0.4
Ship repairs	Ship repairs1	Spraying	Xylene	7	6	472.4	9.448	EPA	5	1
Ship repairs	Ship repairs1	Spraying	Xylene	7	6	1.25	0.025	EPA	5	1
Ship repairs	Ship repairs1	Spraying	Ethyl acetate	7	6	0.1	0.0005	EPA	1	0.2
Ship repairs	Ship repairs1	Spraying	Ethyl acetate	7	6	0.1	0.0005	EPA	1	0.2
Ship repairs	Ship repairs2	Electrowelding	Welding fume	7	6	6.2	1.55	EPA	#NULL!	#NULL!
Ship repairs	Ship repairs2	Electrowelding	Welding fume	7	6	11.2	2.8	EPA	#NULL!	#NULL!
Ship repairs	Ship repairs2	Electrowelding	Welding fume	7	6	0.7	0.175	EPA	#NULL!	#NULL!
Ship repairs	Ship repairs2	Electrowelding	Welding fume	7	6	9.4	2.35	EPA	#NULL!	#NULL!
Ship repairs	Ship repairs2	Electrowelding	Welding fume	7	6	2	0.5	EPA	#NULL!	#NULL!
Ship repairs	Ship repairs2	Electrowelding	Welding fume	7	6	0.6	0.15	EPA	#NULL!	#NULL!
Ship repairs	Ship repairs2	Electrowelding	Welding fume	7	6	2.7	0.675	EPA	#NULL!	#NULL!
Ship repairs	Ship repairs2	Electrowelding	Welding fume	7	6	4.3	1.075	EPA	#NULL!	#NULL!
Ship repairs	Ship repairs2	Electrowelding	Welding fume	7	6	1.3	0.325	EPA	#NULL!	#NULL!
Ship repairs	Ship repairs2	Electrowelding	Welding fume	7	6	21.3	5.325	EPA	#NULL!	#NULL!
Ship repairs	Ship repairs2	Electrowelding	Welding fume	7	6	15.2	3.8	EPA	#NULL!	#NULL!
Ship repairs	Ship repairs2	Electrowelding	Welding fume	7	6	19	4.75	EPA	#NULL!	#NULL!
Ship repairs	Ship repairs2	Electrowelding	Welding fume	7	6	5.7	1.425	EPA	#NULL!	#NULL!
Ship repairs	Ship repairs2	Electrowelding	Welding fume	7	6	8.9	2.225	EPA	#NULL!	#NULL!
Ship repairs	Ship repairs2	Electrowelding	Welding fume	7	6	14.5	3.625	EPA	#NULL!	#NULL!
Ship repairs	Ship repairs2	Electrowelding	Welding fume	7	6	13	3.25	EPA	#NULL!	#NULL!
Ship repairs	Ship repairs2	Electrowelding	Welding fume	7	6	6.8	1.7	EPA	#NULL!	#NULL!
Ship repairs	Ship repairs2	Electrowelding	Welding fume	7	6	6.7	1.675	EPA	#NULL!	#NULL!
Ship repairs	Ship repairs2	Electrowelding	Welding fume	7	6	9.2	2.3	EPA	#NULL!	#NULL!
Ship repairs	Ship repairs2	Electrowelding	Welding fume	7	6	14	3.5	EPA	#NULL!	#NULL!
Ship repairs	Ship repairs2	Electrowelding	Welding fume	7	6	2.3	0.575	EPA	#NULL!	#NULL!
Ship repairs	Ship repairs2	Electrowelding	Welding fume	7	6	14.9	3.725	EPA	#NULL!	#NULL!
Ship repairs	Ship repairs2	Electrowelding	Welding fume	7	6	7.4	1.85	EPA	#NULL!	#NULL!
Ship repairs	Ship repairs2	Electrowelding	Welding fume	7	6	2.1	0.525	EPA	#NULL!	#NULL!
Ship repairs	Ship repairs2	Electrowelding	Welding fume	7	6	3.3	0.825	EPA	#NULL!	#NULL!
Ship repairs	Ship repairs2	Electrowelding	Welding fume	7	6	1.2	0.3	EPA	#NULL!	#NULL!
Ship repairs	Ship repairs2	Electrowelding	Welding fume	7	6	4.3	1.075	EPA	#NULL!	#NULL!
Ship repairs	Ship repairs2	Electrowelding	Welding fume	7	6	2.3	0.575	EPA	#NULL!	#NULL!
Ship repairs	Ship repairs2	Electrowelding	Welding fume	7	6	9.9	2.475	EPA	#NULL!	#NULL!
Ship repairs	Ship repairs2	Electrowelding	Welding fume	7	6	1.3	0.325	EPA	#NULL!	#NULL!
Ship repairs	Ship repairs2	Electrowelding	Welding fume	7	6	2.9	0.725	EPA	#NULL!	#NULL!
Ship repairs	Ship repairs2	Electrowelding	Welding fume	7	6	2.5	0.625	EPA	#NULL!	#NULL!
Ship repairs	Ship repairs2	Electrowelding	Welding fume	7	6	2.4	0.6	EPA	#NULL!	#NULL!
Ship repairs	Ship repairs2	Electrowelding	Welding fume	7	6	0.5	0.125	EPA	#NULL!	#NULL!
Ship repairs	Ship repairs2	Electrowelding	Welding fume	7	6	0.9	0.225	EPA	#NULL!	#NULL!
Ship repairs	Ship repairs2	Electrowelding	Welding fume	7	6	6.8	1.7	EPA	#NULL!	#NULL!
Ship repairs	Ship repairs2	Electrowelding	Welding fume	7	6	0.6	0.15	EPA	#NULL!	#NULL!
Ship repairs	Ship repairs2	Electrowelding	Welding fume	7	6	4.6	1.15	EPA	#NULL!	#NULL!
Ship repairs	Ship repairs2	Electrowelding	Welding fume	7	6	10.4	2.6	EPA	#NULL!	#NULL!
Ship repairs	Ship repairs2	Electrowelding	Welding fume	7	6	6.9	1.725	EPA	#NULL!	#NULL!
Ship repairs	Ship repairs2	Electrowelding	Welding fume	7	6	0.8	0.2	EPA	#NULL!	#NULL!
Ship repairs	Ship repairs2	Electrowelding	Welding fume	7	6	5.8	1.45	EPA	#NULL!	#NULL!
Ship repairs	Ship repairs2	Electrowelding	Welding fume	7	6	1.3	0.325	EPA	#NULL!	#NULL!
Ship repairs	Ship repairs2	Electrowelding	Welding fume	7	6	10.9	2.725	EPA	#NULL!	#NULL!
Ship repairs	Ship repairs2	Electrowelding	Welding fume	7	6	3.9	0.975	EPA	#NULL!	#NULL!
Ship repairs	Ship repairs2	Electrowelding	Welding fume	7	6	0.4	0.1	EPA	#NULL!	#NULL!
Ship repairs	Ship repairs2	Electrowelding	Welding fume	7	6	7	1.75	EPA	#NULL!	#NULL!
Ship repairs	Ship repairs2	Electrowelding	Welding fume	7	6	1.8	0.45	EPA	#NULL!	#NULL!
Ship repairs	Ship repairs2	Electrowelding	Welding fume	7	6	6.3	1.575	EPA	#NULL!	#NULL!
Ship repairs	Ship repairs2	Electrowelding	Welding fume	7	6	7.8	1.95	EPA	#NULL!	#NULL!
Ship repairs	Ship repairs2	Electrowelding	Welding fume	7	6	5.8	1.45	EPA	#NULL!	#NULL!
Ship repairs	Ship repairs2	Electrowelding	Welding fume	7	6	6.8	1.7	EPA	#NULL!	#NULL!
Ship repairs	Ship repairs2	Electrowelding	Welding fume	7	6	1.2	0.3	EPA	#NULL!	#NULL!
Ship repairs	Ship repairs2	Electrowelding	Welding fume	7	6	4.4	1.1	EPA	#NULL!	#NULL!
Ship repairs	Ship repairs2	Electrowelding	Welding fume	7	6	4.8	1.2	EPA	#NULL!	#NULL!
Ship repairs	Ship repairs2	Electrowelding	Welding fume	7	6	6.3	1.575	EPA	#NULL!	#NULL!
Ship repairs	Ship repairs2	Electrowelding	Welding fume	7	6	15	3.75	EPA	#NULL!	#NULL!
Ship repairs	Ship repairs2	Electrowelding	Welding fume	7	6	6.4	1.6	EPA	#NULL!	#NULL!
Ship repairs	Ship repairs2	Electrowelding	Welding fume	7	6	18	4.5	EPA	#NULL!	#NULL!
Ship repairs	Ship repairs2	Electrowelding	Welding fume	7	6	16.1	4.025	EPA	#NULL!	#NULL!
Ship repairs	Ship repairs2	Electrowelding	Welding fume	7	6	1.4	0.35	EPA	#NULL!	#NULL!
Ship repairs	Ship repairs2	Electrowelding	Welding fume	7	6	9.7	2.425	EPA	#NULL!	#NULL!
Ship repairs	Ship repairs2	Electrowelding	Welding fume	7	6	7.1	1.775	EPA	#NULL!	#NULL!
Ship repairs	Ship repairs2	Electrowelding	Welding fume	7	6	8.2	2.05	EPA	#NULL!	#NULL!
Ship repairs	Ship repairs2	Electrowelding	Welding fume	7	6	2	0.5	EPA	#NULL!	#NULL!
Ship repairs	Ship repairs2	Electrowelding	Welding fume	7	6	5.7	1.425	EPA	#NULL!	#NULL!
Ship repairs	Ship repairs2	Electrowelding	Welding fume	7	6	11.3	2.825	EPA	#NULL!	#NULL!
Ship repairs	Ship repairs2	Electrowelding	Welding fume	7	6	1.6	0.4	EPA	#NULL!	#NULL!
Ship repairs	Ship repairs2	Electrowelding	Welding fume	7	6	20	5	EPA	#NULL!	#NULL!
Ship repairs	Ship repairs2	Electrowelding	Manganese and inorganic compounds	7	6	0.098	0.653333	EPA	5	1
Ship repairs	Ship repairs2	Electrowelding	Manganese and inorganic compounds	7	6	0.037	0.246667	EPA	5	1
Ship repairs	Ship repairs2	Electrowelding	Manganese and inorganic compounds	7	6	0.047	0.313333	EPA	5	1
Ship repairs	Ship repairs2	Electrowelding	Manganese and inorganic compounds	7	6	0.06	0.4	EPA	5	1
Ship repairs	Ship repairs2	Electrowelding	Manganese and inorganic compounds	7	6	0.0075	0.05	EPA	5	1
Ship repairs	Ship repairs2	Electrowelding	Manganese and inorganic compounds	7	6	0.034	0.226667	EPA	5	1
Ship repairs	Ship repairs2	Electrowelding	Manganese and inorganic compounds	7	6	0.147	0.98	EPA	5	1
Ship repairs	Ship repairs2	Electrowelding	Manganese and inorganic compounds	7	6	0.0065	0.0433333	EPA	5	1
Ship repairs	Ship repairs2	Electrowelding	Manganese and inorganic compounds	7	6	0.007	0.0466667	EPA	5	1
Ship repairs	Ship repairs2	Electrowelding	Manganese and inorganic compounds	7	6	1.054	7.02667	EPA	5	1
Ship repairs	Ship repairs2	Electrowelding	Manganese and inorganic compounds	7	6	0.015	0.1	EPA	5	1
Ship repairs	Ship repairs2	Electrowelding	Manganese and inorganic compounds	7	6	0.005	0.0333333	EPA	5	1
Ship repairs	Ship repairs2	Electrowelding	Manganese and inorganic compounds	7	6	0.068	0.453333	EPA	5	1
Ship repairs	Ship repairs2	Electrowelding	Manganese and inorganic compounds	7	6	0.068	0.453333	EPA	5	1
Ship repairs	Ship repairs2	Electrowelding	Manganese and inorganic compounds	7	6	0.047	0.313333	EPA	5	1
Ship repairs	Ship repairs2	Electrowelding	Manganese and inorganic compounds	7	6	0.009	0.06	EPA	5	1
Ship repairs	Ship repairs2	Electrowelding	Manganese and inorganic compounds	7	6	0.016	0.106667	EPA	5	1
Ship repairs	Ship repairs2	Electrowelding	Manganese and inorganic compounds	7	6	0.0075	0.05	EPA	5	1
Ship repairs	Ship repairs2	Electrowelding	Manganese and inorganic compounds	7	6	0.032	0.213333	EPA	5	1
Ship repairs	Ship repairs2	Electrowelding	Manganese and inorganic compounds	7	6	0.0085	0.0566667	EPA	5	1
Ship repairs	Ship repairs2	Electrowelding	Manganese and inorganic compounds	7	6	0.072	0.48	EPA	5	1
Ship repairs	Ship repairs2	Electrowelding	Manganese and inorganic compounds	7	6	0.0085	0.0566667	EPA	5	1
Ship repairs	Ship repairs2	Electrowelding	Manganese and inorganic compounds	7	6	0.074	0.493333	EPA	5	1
Ship repairs	Ship repairs2	Electrowelding	Manganese and inorganic compounds	7	6	0.022	0.146667	EPA	5	1
Ship repairs	Ship repairs2	Electrowelding	Manganese and inorganic compounds	7	6	0.049	0.326667	EPA	5	1
Ship repairs	Ship repairs2	Electrowelding	Manganese and inorganic compounds	7	6	0.433	2.88667	EPA	5	1
Ship repairs	Ship repairs2	Electrowelding	Manganese and inorganic compounds	7	6	0.013	0.0866667	EPA	5	1
Ship repairs	Ship repairs2	Electrowelding	Manganese and inorganic compounds	7	6	0.031	0.206667	EPA	5	1
Ship repairs	Ship repairs2	Electrowelding	Manganese and inorganic compounds	7	6	0.066	0.44	EPA	5	1
Ship repairs	Ship repairs2	Electrowelding	Manganese and inorganic compounds	7	6	0.017	0.113333	EPA	5	1
Ship repairs	Ship repairs2	Electrowelding	Manganese and inorganic compounds	7	6	0.115	0.766667	EPA	5	1
Ship repairs	Ship repairs2	Electrowelding	Manganese and inorganic compounds	7	6	0.016	0.106667	EPA	5	1
Ship repairs	Ship repairs2	Electrowelding	Manganese and inorganic compounds	7	6	0.015	0.1	EPA	5	1
Ship repairs	Ship repairs2	Electrowelding	Manganese and inorganic compounds	7	6	0.016	0.106667	EPA	5	1
Ship repairs	Ship repairs2	Electrowelding	Manganese and inorganic compounds	7	6	0.0095	0.0633333	EPA	5	1
Ship repairs	Ship repairs2	Electrowelding	Manganese and inorganic compounds	7	6	0.018	0.12	EPA	5	1
Ship repairs	Ship repairs2	Electrowelding	Manganese and inorganic compounds	7	6	0.079	0.526667	EPA	5	1
Ship repairs	Ship repairs2	Electrowelding	Manganese and inorganic compounds	7	6	0.038	0.253333	EPA	5	1
Ship repairs	Ship repairs2	Electrowelding	Manganese and inorganic compounds	7	6	0.008	0.0533333	EPA	5	1
Ship repairs	Ship repairs2	Electrowelding	Manganese and inorganic compounds	7	6	0.068	0.453333	EPA	5	1
Ship repairs	Ship repairs2	Electrowelding	Manganese and inorganic compounds	7	6	0.093	0.62	EPA	5	1
Ship repairs	Ship repairs2	Electrowelding	Manganese and inorganic compounds	7	6	0.008	0.0533333	EPA	5	1
Ship repairs	Ship repairs2	Electrowelding	Manganese and inorganic compounds	7	6	0.049	0.326667	EPA	5	1
Ship repairs	Ship repairs2	Electrowelding	Manganese and inorganic compounds	7	6	0.185	1.23333	EPA	5	1
Ship repairs	Ship repairs2	Electrowelding	Manganese and inorganic compounds	7	6	0.114	0.76	EPA	5	1
Ship repairs	Ship repairs2	Electrowelding	Manganese and inorganic compounds	7	6	0.073	0.486667	EPA	5	1
Ship repairs	Ship repairs2	Electrowelding	Manganese and inorganic compounds	7	6	0.0075	0.05	EPA	5	1
Ship repairs	Ship repairs2	Electrowelding	Manganese and inorganic compounds	7	6	0.017	0.113333	EPA	5	1
Ship repairs	Ship repairs2	Electrowelding	Manganese and inorganic compounds	7	6	0.04	0.266667	EPA	5	1
Ship repairs	Ship repairs2	Electrowelding	Manganese and inorganic compounds	7	6	4.347	28.98	EPA	5	1
Ship repairs	Ship repairs2	Electrowelding	Manganese and inorganic compounds	7	6	1.125	7.5	EPA	5	1
Ship repairs	Ship repairs2	Electrowelding	Manganese and inorganic compounds	7	6	0.019	0.126667	EPA	5	1
Ship repairs	Ship repairs2	Electrowelding	Manganese and inorganic compounds	7	6	0.062	0.413333	EPA	5	1
Ship repairs	Ship repairs2	Electrowelding	Manganese and inorganic compounds	7	6	0.032	0.213333	EPA	5	1
Ship repairs	Ship repairs2	Electrowelding	Manganese and inorganic compounds	7	6	0.051	0.34	EPA	5	1
Ship repairs	Ship repairs2	Electrowelding	Manganese and inorganic compounds	7	6	0.178	1.18667	EPA	5	1
Ship repairs	Ship repairs2	Electrowelding	Manganese and inorganic compounds	7	6	0.115	0.766667	EPA	5	1
Ship repairs	Ship repairs2	Electrowelding	Manganese and inorganic compounds	7	6	0.226	1.50667	EPA	5	1
Ship repairs	Ship repairs2	Electrowelding	Manganese and inorganic compounds	7	6	0.066	0.44	EPA	5	1
Ship repairs	Ship repairs2	Electrowelding	Manganese and inorganic compounds	7	6	0.045	0.3	EPA	5	1
Ship repairs	Ship repairs2	Electrowelding	Manganese and inorganic compounds	7	6	0.008	0.0533333	EPA	5	1
Ship repairs	Ship repairs2	Electrowelding	Manganese and inorganic compounds	7	6	0.08	0.533333	EPA	5	1
Ship repairs	Ship repairs2	Electrowelding	Manganese and inorganic compounds	7	6	0.15	1	EPA	5	1
Ship repairs	Ship repairs2	Electrowelding	Manganese and inorganic compounds	7	6	0.129	0.86	EPA	5	1
Ship repairs	Ship repairs2	Electrowelding	Nitrogen oxides	7	6	0.07	0.014	EPA	#NULL!	#NULL!
Ship repairs	Ship repairs2	Electrowelding	Nitrogen oxides	7	6	0.06	0.012	EPA	#NULL!	#NULL!
Ship repairs	Ship repairs2	Electrowelding	Nitrogen oxides	7	6	0.07	0.014	EPA	#NULL!	#NULL!
Ship repairs	Ship repairs2	Electrowelding	Nitrogen oxides	7	6	0.08	0.016	EPA	#NULL!	#NULL!
Ship repairs	Ship repairs2	Electrowelding	Nitrogen oxides	7	6	0.09	0.018	EPA	#NULL!	#NULL!
Ship repairs	Ship repairs2	Electrowelding	Nitrogen oxides	7	6	0.06	0.012	EPA	#NULL!	#NULL!
Ship repairs	Ship repairs2	Electrowelding	Nitrogen oxides	7	6	0.06	0.012	EPA	#NULL!	#NULL!
Ship repairs	Ship repairs2	Electrowelding	Nitrogen oxides	7	6	0.07	0.014	EPA	#NULL!	#NULL!
Ship repairs	Ship repairs2	Electrowelding	Nitrogen oxides	7	6	0.06	0.012	EPA	#NULL!	#NULL!
Ship repairs	Ship repairs2	Electrowelding	Nitrogen oxides	7	6	0.09	0.018	EPA	#NULL!	#NULL!
Ship repairs	Ship repairs2	Electrowelding	Nitrogen oxides	7	6	0.09	0.018	EPA	#NULL!	#NULL!
Ship repairs	Ship repairs2	Electrowelding	Nitrogen oxides	7	6	0.08	0.016	EPA	#NULL!	#NULL!
Ship repairs	Ship repairs2	Electrowelding	Nitrogen oxides	7	6	0.06	0.012	EPA	#NULL!	#NULL!
Ship repairs	Ship repairs2	Electrowelding	Nitrogen oxides	7	6	0.06	0.012	EPA	#NULL!	#NULL!
Ship repairs	Ship repairs2	Electrowelding	Nitrogen oxides	7	6	0.06	0.012	EPA	#NULL!	#NULL!
Ship repairs	Ship repairs2	Electrowelding	Nitrogen oxides	7	6	0.08	0.016	EPA	#NULL!	#NULL!
Ship repairs	Ship repairs2	Electrowelding	Nitrogen oxides	7	6	0.07	0.014	EPA	#NULL!	#NULL!
Ship repairs	Ship repairs2	Electrowelding	Nitrogen oxides	7	6	0.07	0.014	EPA	#NULL!	#NULL!
Ship repairs	Ship repairs2	Electrowelding	Nitrogen oxides	7	6	0.06	0.012	EPA	#NULL!	#NULL!
Ship repairs	Ship repairs2	Electrowelding	Nitrogen oxides	7	6	0.07	0.014	EPA	#NULL!	#NULL!
Ship repairs	Ship repairs2	Electrowelding	Nitrogen oxides	7	6	0.06	0.012	EPA	#NULL!	#NULL!
Ship repairs	Ship repairs2	Electrowelding	Nitrogen oxides	7	6	0.06	0.012	EPA	#NULL!	#NULL!
Ship repairs	Ship repairs2	Electrowelding	Nitrogen oxides	7	6	0.06	0.012	EPA	#NULL!	#NULL!
Ship repairs	Ship repairs2	Electrowelding	Nitrogen oxides	7	6	0.06	0.012	EPA	#NULL!	#NULL!
Ship repairs	Ship repairs2	Electrowelding	Nitrogen oxides	7	6	0.06	0.012	EPA	#NULL!	#NULL!
Ship repairs	Ship repairs2	Electrowelding	Nitrogen oxides	7	6	0.04	0.008	EPA	#NULL!	#NULL!
Ship repairs	Ship repairs2	Electrowelding	Nitrogen oxides	7	6	0.06	0.012	EPA	#NULL!	#NULL!
Ship repairs	Ship repairs2	Electrowelding	Nitrogen oxides	7	6	0.06	0.012	EPA	#NULL!	#NULL!
Ship repairs	Ship repairs2	Electrowelding	Nitrogen oxides	7	6	0.06	0.012	EPA	#NULL!	#NULL!
Ship repairs	Ship repairs2	Electrowelding	Nitrogen oxides	7	6	0.07	0.014	EPA	#NULL!	#NULL!
Ship repairs	Ship repairs2	Polishing	Grinding wheel dust	7	6	1.2	0.15	EPA	#NULL!	#NULL!
Ship repairs	Ship repairs2	Polishing	Grinding wheel dust	7	6	9.7	1.2125	EPA	#NULL!	#NULL!
Ship repairs	Ship repairs2	Polishing	Grinding wheel dust	7	6	8.5	1.0625	EPA	#NULL!	#NULL!
Ship repairs	Ship repairs2	Polishing	Grinding wheel dust	7	6	2.2	0.275	EPA	#NULL!	#NULL!
Ship repairs	Ship repairs2	Polishing	Grinding wheel dust	7	6	0.9	0.1125	EPA	#NULL!	#NULL!
Ship repairs	Ship repairs2	Polishing	Grinding wheel dust	7	6	1.6	0.2	EPA	#NULL!	#NULL!
Ship repairs	Ship repairs2	Polishing	Grinding wheel dust	7	6	0.5	0.0625	EPA	#NULL!	#NULL!
Ship repairs	Ship repairs2	Polishing	Grinding wheel dust	7	6	0.7	0.0875	EPA	#NULL!	#NULL!
Ship repairs	Ship repairs2	Polishing	Grinding wheel dust	7	6	1.3	0.1625	EPA	#NULL!	#NULL!
Ship repairs	Ship repairs2	Polishing	Grinding wheel dust	7	6	1.7	0.2125	EPA	#NULL!	#NULL!
Ship repairs	Ship repairs2	Polishing	Grinding wheel dust	7	6	1.2	0.15	EPA	#NULL!	#NULL!
Ship repairs	Ship repairs2	Polishing	Grinding wheel dust	7	6	1.3	0.1625	EPA	#NULL!	#NULL!
Ship repairs	Ship repairs2	Polishing	Grinding wheel dust	7	6	1.7	0.2125	EPA	#NULL!	#NULL!
Ship repairs	Ship repairs2	Polishing	Grinding wheel dust	7	6	1.1	0.1375	EPA	#NULL!	#NULL!
Ship repairs	Ship repairs2	Polishing	Grinding wheel dust	7	6	1.7	0.2125	EPA	#NULL!	#NULL!
Ship repairs	Ship repairs2	Polishing	Grinding wheel dust	7	6	0.6	0.075	EPA	#NULL!	#NULL!
Ship repairs	Ship repairs2	Polishing	Grinding wheel dust	7	6	2.1	0.2625	EPA	#NULL!	#NULL!
Ship repairs	Ship repairs2	Polishing	Grinding wheel dust	7	6	0.8	0.1	EPA	#NULL!	#NULL!
Ship repairs	Ship repairs2	Polishing	Grinding wheel dust	7	6	1.4	0.175	EPA	#NULL!	#NULL!
Ship repairs	Ship repairs2	Polishing	Grinding wheel dust	7	6	1.2	0.15	EPA	#NULL!	#NULL!
Ship repairs	Ship repairs2	Polishing	Grinding wheel dust	7	6	2.5	0.3125	EPA	#NULL!	#NULL!
Ship repairs	Ship repairs2	Polishing	Grinding wheel dust	7	6	0.9	0.1125	EPA	#NULL!	#NULL!
Ship repairs	Ship repairs2	Polishing	Grinding wheel dust	7	6	4.62	0.5775	EPA	#NULL!	#NULL!
Ship repairs	Ship repairs2	Polishing	Grinding wheel dust	7	6	3.3	0.4125	EPA	#NULL!	#NULL!
Ship repairs	Ship repairs2	Polishing	Grinding wheel dust	7	6	1.6	0.2	EPA	#NULL!	#NULL!
Ship repairs	Ship repairs2	Polishing	Grinding wheel dust	7	6	4.7	0.5875	EPA	#NULL!	#NULL!
Ship repairs	Ship repairs2	Polishing	Grinding wheel dust	7	6	1.8	0.225	EPA	#NULL!	#NULL!
Ship repairs	Ship repairs2	Polishing	Grinding wheel dust	7	6	2	0.25	EPA	#NULL!	#NULL!
Ship repairs	Ship repairs2	Polishing	Grinding wheel dust	7	6	0.7	0.0875	EPA	#NULL!	#NULL!
Ship repairs	Ship repairs2	Polishing	Grinding wheel dust	7	6	0.8	0.1	EPA	#NULL!	#NULL!
Ship repairs	Ship repairs2	Polishing	Grinding wheel dust	7	6	0.4	0.05	EPA	#NULL!	#NULL!
Ship repairs	Ship repairs2	Polishing	Grinding wheel dust	7	6	10.8	1.35	EPA	#NULL!	#NULL!
Ship repairs	Ship repairs2	Polishing	Grinding wheel dust	7	6	7.9	0.9875	EPA	#NULL!	#NULL!
Ship repairs	Ship repairs2	Polishing	Grinding wheel dust	7	6	5.7	0.7125	EPA	#NULL!	#NULL!
Ship repairs	Ship repairs2	Polishing	Grinding wheel dust	7	6	2.3	0.2875	EPA	#NULL!	#NULL!
Ship repairs	Ship repairs2	Polishing	Grinding wheel dust	7	6	11.8	1.475	EPA	#NULL!	#NULL!
Ship repairs	Ship repairs2	Polishing	Grinding wheel dust	7	6	1.6	0.2	EPA	#NULL!	#NULL!
Ship repairs	Ship repairs2	Polishing	Grinding wheel dust	7	6	0.8	0.1	EPA	#NULL!	#NULL!
Ship repairs	Ship repairs2	Polishing	Grinding wheel dust	7	6	4.9	0.6125	EPA	#NULL!	#NULL!
Ship repairs	Ship repairs2	Polishing	Grinding wheel dust	7	6	0.9	0.1125	EPA	#NULL!	#NULL!
Ship repairs	Ship repairs2	Polishing	Grinding wheel dust	7	6	25.4	3.175	EPA	#NULL!	#NULL!
Ship repairs	Ship repairs2	Polishing	Grinding wheel dust	7	6	32	4	EPA	#NULL!	#NULL!
Ship repairs	Ship repairs2	Polishing	Grinding wheel dust	7	6	1.4	0.175	EPA	#NULL!	#NULL!
Ship repairs	Ship repairs2	Polishing	Grinding wheel dust	7	6	8.6	1.075	EPA	#NULL!	#NULL!
Ship repairs	Ship repairs2	Polishing	Grinding wheel dust	7	6	11.6	1.45	EPA	#NULL!	#NULL!
Ship repairs	Ship repairs2	Polishing	Grinding wheel dust	7	6	5.3	0.6625	EPA	#NULL!	#NULL!
Ship repairs	Ship repairs2	Polishing	Grinding wheel dust	7	6	15.9	1.9875	EPA	#NULL!	#NULL!
Ship repairs	Ship repairs2	Polishing	Grinding wheel dust	7	6	0.9	0.1125	EPA	#NULL!	#NULL!
Ship repairs	Ship repairs2	Spraying	Benzene	7	6	1	0.166667	EPA	5	1
Ship repairs	Ship repairs2	Spraying	Benzene	7	6	1.2	0.2	EPA	5	1
Ship repairs	Ship repairs2	Spraying	Benzene	7	6	0.05	0.00833333	EPA	2	0.4
Ship repairs	Ship repairs2	Spraying	Benzene	7	6	0.05	0.00833333	EPA	2	0.4
Ship repairs	Ship repairs2	Spraying	Benzene	7	6	0.05	0.00833333	EPA	2	0.4
Ship repairs	Ship repairs2	Spraying	Xylene	7	6	14.5	0.29	EPA	5	1
Ship repairs	Ship repairs2	Spraying	Xylene	7	6	16.5	0.33	EPA	5	1
Ship repairs	Ship repairs2	Spraying	Xylene	7	6	1.2	0.024	EPA	5	1
Ship repairs	Ship repairs2	Spraying	Xylene	7	6	0.7	0.014	EPA	4	0.8
Ship repairs	Ship repairs2	Spraying	Xylene	7	6	2.1	0.042	EPA	5	1
Ship repairs	Ship repairs2	Spraying	Ethyl acetate	7	6	0.05	0.00025	EPA	1	0.2
Ship repairs	Ship repairs2	Spraying	Ethyl acetate	7	6	0.05	0.00025	EPA	1	0.2
Ship repairs	Ship repairs2	Spraying	Ethyl acetate	7	6	0.05	0.00025	EPA	1	0.2
Ship repairs	Ship repairs2	Spraying	Ethyl acetate	7	6	0.05	0.00025	EPA	1	0.2
Ship repairs	Ship repairs2	Spraying	Ethyl acetate	7	6	0.05	0.00025	EPA	1	0.2
Ship repairs	Ship repairs2	Sanding	Other dust	7	6	10.1	1.2625	EPA	#NULL!	#NULL!
Ship repairs	Ship repairs2	Sanding	Other dust	7	6	2	0.25	EPA	#NULL!	#NULL!
Ship repairs	Ship repairs2	Sanding	Other dust	7	6	9.2	1.15	EPA	#NULL!	#NULL!
Ship repairs	Ship repairs2	Sanding	Other dust	7	6	8	1	EPA	#NULL!	#NULL!
Ship repairs	Ship repairs2	Sanding	Other dust	7	6	8	1	EPA	#NULL!	#NULL!
Ship repairs	Ship repairs2	Sanding	Other dust	7	6	8	1	EPA	#NULL!	#NULL!
Ship repairs	Ship repairs2	Sanding	Other dust	7	6	8	1	EPA	#NULL!	#NULL!
Ship repairs	Ship repairs2	Sanding	Other dust	7	6	8	1	EPA	#NULL!	#NULL!
Ship repairs	Ship repairs2	Sanding	Other dust	7	6	8	1	EPA	#NULL!	#NULL!
Ship repairs	Ship repairs2	Sanding	Other dust	7	6	8	1	EPA	#NULL!	#NULL!
Ship repairs	Ship repairs2	Sanding	Other dust	7	6	8	1	EPA	#NULL!	#NULL!
Ship repairs	Ship repairs2	Sanding	Other dust	7	6	8	1	EPA	#NULL!	#NULL!
Ship repairs	Ship repairs3	Electrowelding	Welding fume	7	6	0.9	0.225	EPA	#NULL!	#NULL!
Ship repairs	Ship repairs3	Electrowelding	Welding fume	7	6	2.8	0.7	EPA	#NULL!	#NULL!
Ship repairs	Ship repairs3	Electrowelding	Welding fume	7	6	0.7	0.175	EPA	#NULL!	#NULL!
Ship repairs	Ship repairs3	Electrowelding	Welding fume	7	6	5	1.25	EPA	#NULL!	#NULL!
Ship repairs	Ship repairs3	Electrowelding	Welding fume	7	6	7.2	1.8	EPA	#NULL!	#NULL!
Ship repairs	Ship repairs3	Electrowelding	Welding fume	7	6	21.6	5.4	EPA	#NULL!	#NULL!
Ship repairs	Ship repairs3	Electrowelding	Welding fume	7	6	3.9	0.975	EPA	#NULL!	#NULL!
Ship repairs	Ship repairs3	Electrowelding	Welding fume	7	6	6	1.5	EPA	#NULL!	#NULL!
Ship repairs	Ship repairs3	Electrowelding	Welding fume	7	6	2.8	0.7	EPA	#NULL!	#NULL!
Ship repairs	Ship repairs3	Electrowelding	Welding fume	7	6	2.8	0.7	EPA	#NULL!	#NULL!
Ship repairs	Ship repairs3	Electrowelding	Welding fume	7	6	2.1	0.525	EPA	#NULL!	#NULL!
Ship repairs	Ship repairs3	Electrowelding	Welding fume	7	6	2.5	0.625	EPA	#NULL!	#NULL!
Ship repairs	Ship repairs3	Electrowelding	Welding fume	7	6	2.1	0.525	EPA	#NULL!	#NULL!
Ship repairs	Ship repairs3	Electrowelding	Welding fume	7	6	2.9	0.725	EPA	#NULL!	#NULL!
Ship repairs	Ship repairs3	Electrowelding	Welding fume	7	6	4.7	1.175	EPA	#NULL!	#NULL!
Ship repairs	Ship repairs3	Electrowelding	Welding fume	7	6	3.6	0.9	EPA	#NULL!	#NULL!
Ship repairs	Ship repairs3	Electrowelding	Welding fume	7	6	4.8	1.2	EPA	#NULL!	#NULL!
Ship repairs	Ship repairs3	Electrowelding	Welding fume	7	6	1.7	0.425	EPA	#NULL!	#NULL!
Ship repairs	Ship repairs3	Electrowelding	Welding fume	7	6	5	1.25	EPA	#NULL!	#NULL!
Ship repairs	Ship repairs3	Electrowelding	Welding fume	7	6	3.8	0.95	EPA	#NULL!	#NULL!
Ship repairs	Ship repairs3	Electrowelding	Welding fume	7	6	17.3	4.325	EPA	#NULL!	#NULL!
Ship repairs	Ship repairs3	Electrowelding	Welding fume	7	6	1.4	0.35	EPA	#NULL!	#NULL!
Ship repairs	Ship repairs3	Electrowelding	Welding fume	7	6	0.9	0.225	EPA	#NULL!	#NULL!
Ship repairs	Ship repairs3	Electrowelding	Welding fume	7	6	3	0.75	EPA	#NULL!	#NULL!
Ship repairs	Ship repairs3	Electrowelding	Welding fume	7	6	5.9	1.475	EPA	#NULL!	#NULL!
Ship repairs	Ship repairs3	Electrowelding	Welding fume	7	6	4.6	1.15	EPA	#NULL!	#NULL!
Ship repairs	Ship repairs3	Electrowelding	Welding fume	7	6	9.2	2.3	EPA	#NULL!	#NULL!
Ship repairs	Ship repairs3	Electrowelding	Welding fume	7	6	1.8	0.45	EPA	#NULL!	#NULL!
Ship repairs	Ship repairs3	Electrowelding	Welding fume	7	6	1.4	0.35	EPA	#NULL!	#NULL!
Ship repairs	Ship repairs3	Electrowelding	Welding fume	7	6	4.6	1.15	EPA	#NULL!	#NULL!
Ship repairs	Ship repairs3	Electrowelding	Welding fume	7	6	4.2	1.05	EPA	#NULL!	#NULL!
Ship repairs	Ship repairs3	Electrowelding	Welding fume	7	6	2.1	0.525	EPA	#NULL!	#NULL!
Ship repairs	Ship repairs3	Electrowelding	Welding fume	7	6	1.8	0.45	EPA	#NULL!	#NULL!
Ship repairs	Ship repairs3	Electrowelding	Welding fume	7	6	13	3.25	EPA	#NULL!	#NULL!
Ship repairs	Ship repairs3	Electrowelding	Welding fume	7	6	13.4	3.35	EPA	#NULL!	#NULL!
Ship repairs	Ship repairs3	Electrowelding	Welding fume	7	6	3	0.75	EPA	#NULL!	#NULL!
Ship repairs	Ship repairs3	Electrowelding	Welding fume	7	6	1.6	0.4	EPA	#NULL!	#NULL!
Ship repairs	Ship repairs3	Electrowelding	Welding fume	7	6	1.2	0.3	EPA	#NULL!	#NULL!
Ship repairs	Ship repairs3	Electrowelding	Welding fume	7	6	19.6	4.9	EPA	#NULL!	#NULL!
Ship repairs	Ship repairs3	Electrowelding	Welding fume	7	6	8.8	2.2	EPA	#NULL!	#NULL!
Ship repairs	Ship repairs3	Electrowelding	Welding fume	7	6	10.7	2.675	EPA	#NULL!	#NULL!
Ship repairs	Ship repairs3	Electrowelding	Welding fume	7	6	26	6.5	EPA	#NULL!	#NULL!
Ship repairs	Ship repairs3	Electrowelding	Welding fume	7	6	11.7	2.925	EPA	#NULL!	#NULL!
Ship repairs	Ship repairs3	Electrowelding	Welding fume	7	6	8.1	2.025	EPA	#NULL!	#NULL!
Ship repairs	Ship repairs3	Electrowelding	Welding fume	7	6	14.3	3.575	EPA	#NULL!	#NULL!
Ship repairs	Ship repairs3	Electrowelding	Welding fume	7	6	0.2	0.05	EPA	#NULL!	#NULL!
Ship repairs	Ship repairs3	Electrowelding	Welding fume	7	6	2.6	0.65	EPA	#NULL!	#NULL!
Ship repairs	Ship repairs3	Electrowelding	Welding fume	7	6	2.7	0.675	EPA	#NULL!	#NULL!
Ship repairs	Ship repairs3	Electrowelding	Welding fume	7	6	23.5	5.875	EPA	#NULL!	#NULL!
Ship repairs	Ship repairs3	Electrowelding	Welding fume	7	6	1.1	0.275	EPA	#NULL!	#NULL!
Ship repairs	Ship repairs3	Electrowelding	Welding fume	7	6	0.7	0.175	EPA	#NULL!	#NULL!
Ship repairs	Ship repairs3	Electrowelding	Welding fume	7	6	1	0.25	EPA	#NULL!	#NULL!
Ship repairs	Ship repairs3	Electrowelding	Welding fume	7	6	1.8	0.45	EPA	#NULL!	#NULL!
Ship repairs	Ship repairs3	Electrowelding	Welding fume	7	6	2.4	0.6	EPA	#NULL!	#NULL!
Ship repairs	Ship repairs3	Electrowelding	Welding fume	7	6	5.8	1.45	EPA	#NULL!	#NULL!
Ship repairs	Ship repairs3	Electrowelding	Welding fume	7	6	30.3	7.575	EPA	#NULL!	#NULL!
Ship repairs	Ship repairs3	Electrowelding	Welding fume	7	6	4.2	1.05	EPA	#NULL!	#NULL!
Ship repairs	Ship repairs3	Electrowelding	Welding fume	7	6	6.1	1.525	EPA	#NULL!	#NULL!
Ship repairs	Ship repairs3	Electrowelding	Welding fume	7	6	4.3	1.075	EPA	#NULL!	#NULL!
Ship repairs	Ship repairs3	Electrowelding	Welding fume	7	6	6.7	1.675	EPA	#NULL!	#NULL!
Ship repairs	Ship repairs3	Electrowelding	Welding fume	7	6	12.6	3.15	EPA	#NULL!	#NULL!
Ship repairs	Ship repairs3	Electrowelding	Welding fume	7	6	3.1	0.775	EPA	#NULL!	#NULL!
Ship repairs	Ship repairs3	Electrowelding	Welding fume	7	6	4.7	1.175	EPA	#NULL!	#NULL!
Ship repairs	Ship repairs3	Electrowelding	Welding fume	7	6	1.8	0.45	EPA	#NULL!	#NULL!
Ship repairs	Ship repairs3	Electrowelding	Welding fume	7	6	4.5	1.125	EPA	#NULL!	#NULL!
Ship repairs	Ship repairs3	Electrowelding	Welding fume	7	6	2.6	0.65	EPA	#NULL!	#NULL!
Ship repairs	Ship repairs3	Electrowelding	Welding fume	7	6	8.7	2.175	EPA	#NULL!	#NULL!
Ship repairs	Ship repairs3	Electrowelding	Welding fume	7	6	4.8	1.2	EPA	#NULL!	#NULL!
Ship repairs	Ship repairs3	Electrowelding	Welding fume	7	6	2	0.5	EPA	#NULL!	#NULL!
Ship repairs	Ship repairs3	Electrowelding	Manganese and inorganic compounds	7	6	0.036	0.24	EPA	5	1
Ship repairs	Ship repairs3	Electrowelding	Manganese and inorganic compounds	7	6	0.029	0.193333	EPA	5	1
Ship repairs	Ship repairs3	Electrowelding	Manganese and inorganic compounds	7	6	0.03	0.2	EPA	5	1
Ship repairs	Ship repairs3	Electrowelding	Manganese and inorganic compounds	7	6	0.024	0.16	EPA	5	1
Ship repairs	Ship repairs3	Electrowelding	Manganese and inorganic compounds	7	6	0.048	0.32	EPA	5	1
Ship repairs	Ship repairs3	Electrowelding	Manganese and inorganic compounds	7	6	0.038	0.253333	EPA	5	1
Ship repairs	Ship repairs3	Electrowelding	Manganese and inorganic compounds	7	6	0.031	0.206667	EPA	5	1
Ship repairs	Ship repairs3	Electrowelding	Manganese and inorganic compounds	7	6	0.046	0.306667	EPA	5	1
Ship repairs	Ship repairs3	Electrowelding	Manganese and inorganic compounds	7	6	0.027	0.18	EPA	5	1
Ship repairs	Ship repairs3	Electrowelding	Manganese and inorganic compounds	7	6	0.024	0.16	EPA	5	1
Ship repairs	Ship repairs3	Electrowelding	Manganese and inorganic compounds	7	6	0.025	0.166667	EPA	5	1
Ship repairs	Ship repairs3	Electrowelding	Manganese and inorganic compounds	7	6	0.03	0.2	EPA	5	1
Ship repairs	Ship repairs3	Electrowelding	Manganese and inorganic compounds	7	6	0.02	0.133333	EPA	5	1
Ship repairs	Ship repairs3	Electrowelding	Manganese and inorganic compounds	7	6	0.033	0.22	EPA	5	1
Ship repairs	Ship repairs3	Electrowelding	Manganese and inorganic compounds	7	6	0.053	0.353333	EPA	5	1
Ship repairs	Ship repairs3	Electrowelding	Manganese and inorganic compounds	7	6	0.039	0.26	EPA	5	1
Ship repairs	Ship repairs3	Electrowelding	Manganese and inorganic compounds	7	6	0.027	0.18	EPA	5	1
Ship repairs	Ship repairs3	Electrowelding	Manganese and inorganic compounds	7	6	0.018	0.12	EPA	5	1
Ship repairs	Ship repairs3	Electrowelding	Manganese and inorganic compounds	7	6	0.052	0.346667	EPA	5	1
Ship repairs	Ship repairs3	Electrowelding	Manganese and inorganic compounds	7	6	0.007	0.0466667	EPA	5	1
Ship repairs	Ship repairs3	Electrowelding	Manganese and inorganic compounds	7	6	0.328	2.18667	EPA	5	1
Ship repairs	Ship repairs3	Electrowelding	Manganese and inorganic compounds	7	6	0.03	0.2	EPA	5	1
Ship repairs	Ship repairs3	Electrowelding	Manganese and inorganic compounds	7	6	0.016	0.106667	EPA	5	1
Ship repairs	Ship repairs3	Electrowelding	Manganese and inorganic compounds	7	6	0.007	0.0466667	EPA	5	1
Ship repairs	Ship repairs3	Electrowelding	Manganese and inorganic compounds	7	6	0.0065	0.0433333	EPA	5	1
Ship repairs	Ship repairs3	Electrowelding	Manganese and inorganic compounds	7	6	0.007	0.0466667	EPA	5	1
Ship repairs	Ship repairs3	Electrowelding	Manganese and inorganic compounds	7	6	0.007	0.0466667	EPA	5	1
Ship repairs	Ship repairs3	Electrowelding	Manganese and inorganic compounds	7	6	0.065	0.433333	EPA	5	1
Ship repairs	Ship repairs3	Electrowelding	Manganese and inorganic compounds	7	6	0.031	0.206667	EPA	5	1
Ship repairs	Ship repairs3	Electrowelding	Manganese and inorganic compounds	7	6	0.067	0.446667	EPA	5	1
Ship repairs	Ship repairs3	Electrowelding	Manganese and inorganic compounds	7	6	0.038	0.253333	EPA	5	1
Ship repairs	Ship repairs3	Electrowelding	Manganese and inorganic compounds	7	6	0.007	0.0466667	EPA	5	1
Ship repairs	Ship repairs3	Electrowelding	Manganese and inorganic compounds	7	6	0.014	0.0933333	EPA	5	1
Ship repairs	Ship repairs3	Electrowelding	Manganese and inorganic compounds	7	6	0.107	0.713333	EPA	5	1
Ship repairs	Ship repairs3	Electrowelding	Manganese and inorganic compounds	7	6	0.029	0.193333	EPA	5	1
Ship repairs	Ship repairs3	Electrowelding	Manganese and inorganic compounds	7	6	0.022	0.146667	EPA	5	1
Ship repairs	Ship repairs3	Electrowelding	Manganese and inorganic compounds	7	6	0.314	2.09333	EPA	5	1
Ship repairs	Ship repairs3	Electrowelding	Manganese and inorganic compounds	7	6	0.215	1.43333	EPA	5	1
Ship repairs	Ship repairs3	Electrowelding	Manganese and inorganic compounds	7	6	0.021	0.14	EPA	5	1
Ship repairs	Ship repairs3	Electrowelding	Manganese and inorganic compounds	7	6	0.0055	0.0366667	EPA	5	1
Ship repairs	Ship repairs3	Electrowelding	Manganese and inorganic compounds	7	6	0.027	0.18	EPA	5	1
Ship repairs	Ship repairs3	Electrowelding	Manganese and inorganic compounds	7	6	0.019	0.126667	EPA	5	1
Ship repairs	Ship repairs3	Electrowelding	Manganese and inorganic compounds	7	6	0.092	0.613333	EPA	5	1
Ship repairs	Ship repairs3	Electrowelding	Manganese and inorganic compounds	7	6	0.141	0.94	EPA	5	1
Ship repairs	Ship repairs3	Electrowelding	Manganese and inorganic compounds	7	6	0.094	0.626667	EPA	5	1
Ship repairs	Ship repairs3	Electrowelding	Manganese and inorganic compounds	7	6	0.01	0.0666667	EPA	5	1
Ship repairs	Ship repairs3	Electrowelding	Manganese and inorganic compounds	7	6	0.037	0.246667	EPA	5	1
Ship repairs	Ship repairs3	Electrowelding	Manganese and inorganic compounds	7	6	0.029	0.193333	EPA	5	1
Ship repairs	Ship repairs3	Electrowelding	Manganese and inorganic compounds	7	6	1.081	7.20667	EPA	5	1
Ship repairs	Ship repairs3	Electrowelding	Manganese and inorganic compounds	7	6	0.023	0.153333	EPA	5	1
Ship repairs	Ship repairs3	Electrowelding	Manganese and inorganic compounds	7	6	0.1	0.666667	EPA	5	1
Ship repairs	Ship repairs3	Electrowelding	Manganese and inorganic compounds	7	6	0.018	0.12	EPA	5	1
Ship repairs	Ship repairs3	Electrowelding	Manganese and inorganic compounds	7	6	0.016	0.106667	EPA	5	1
Ship repairs	Ship repairs3	Electrowelding	Manganese and inorganic compounds	7	6	0.016	0.106667	EPA	5	1
Ship repairs	Ship repairs3	Electrowelding	Manganese and inorganic compounds	7	6	0.009	0.06	EPA	5	1
Ship repairs	Ship repairs3	Electrowelding	Manganese and inorganic compounds	7	6	0.237	1.58	EPA	5	1
Ship repairs	Ship repairs3	Electrowelding	Manganese and inorganic compounds	7	6	0.007	0.0466667	EPA	5	1
Ship repairs	Ship repairs3	Electrowelding	Manganese and inorganic compounds	7	6	0.016	0.106667	EPA	5	1
Ship repairs	Ship repairs3	Electrowelding	Manganese and inorganic compounds	7	6	0.007	0.0466667	EPA	5	1
Ship repairs	Ship repairs3	Electrowelding	Manganese and inorganic compounds	7	6	0.0095	0.0633333	EPA	5	1
Ship repairs	Ship repairs3	Electrowelding	Manganese and inorganic compounds	7	6	0.0095	0.0633333	EPA	5	1
Ship repairs	Ship repairs3	Electrowelding	Manganese and inorganic compounds	7	6	0.0095	0.0633333	EPA	5	1
Ship repairs	Ship repairs3	Electrowelding	Manganese and inorganic compounds	7	6	0.007	0.0466667	EPA	5	1
Ship repairs	Ship repairs3	Electrowelding	Nitrogen oxides	7	6	0.08	0.016	EPA	#NULL!	#NULL!
Ship repairs	Ship repairs3	Electrowelding	Nitrogen oxides	7	6	0.08	0.016	EPA	#NULL!	#NULL!
Ship repairs	Ship repairs3	Electrowelding	Nitrogen oxides	7	6	0.07	0.014	EPA	#NULL!	#NULL!
Ship repairs	Ship repairs3	Electrowelding	Nitrogen oxides	7	6	0.08	0.016	EPA	#NULL!	#NULL!
Ship repairs	Ship repairs3	Electrowelding	Nitrogen oxides	7	6	0.06	0.012	EPA	#NULL!	#NULL!
Ship repairs	Ship repairs3	Electrowelding	Nitrogen oxides	7	6	0.08	0.016	EPA	#NULL!	#NULL!
Ship repairs	Ship repairs3	Electrowelding	Nitrogen oxides	7	6	0.06	0.012	EPA	#NULL!	#NULL!
Ship repairs	Ship repairs3	Electrowelding	Nitrogen oxides	7	6	0.08	0.016	EPA	#NULL!	#NULL!
Ship repairs	Ship repairs3	Electrowelding	Nitrogen oxides	7	6	0.08	0.016	EPA	#NULL!	#NULL!
Ship repairs	Ship repairs3	Electrowelding	Nitrogen oxides	7	6	0.09	0.018	EPA	#NULL!	#NULL!
Ship repairs	Ship repairs3	Electrowelding	Nitrogen oxides	7	6	0.11	0.022	EPA	#NULL!	#NULL!
Ship repairs	Ship repairs3	Electrowelding	Nitrogen oxides	7	6	0.09	0.018	EPA	#NULL!	#NULL!
Ship repairs	Ship repairs3	Electrowelding	Nitrogen oxides	7	6	0.09	0.018	EPA	#NULL!	#NULL!
Ship repairs	Ship repairs3	Electrowelding	Nitrogen oxides	7	6	0.08	0.016	EPA	#NULL!	#NULL!
Ship repairs	Ship repairs3	Electrowelding	Nitrogen oxides	7	6	0.06	0.012	EPA	#NULL!	#NULL!
Ship repairs	Ship repairs3	Electrowelding	Nitrogen oxides	7	6	0.08	0.016	EPA	#NULL!	#NULL!
Ship repairs	Ship repairs3	Electrowelding	Nitrogen oxides	7	6	0.08	0.016	EPA	#NULL!	#NULL!
Ship repairs	Ship repairs3	Electrowelding	Nitrogen oxides	7	6	0.07	0.014	EPA	#NULL!	#NULL!
Ship repairs	Ship repairs3	Electrowelding	Nitrogen oxides	7	6	0.08	0.016	EPA	#NULL!	#NULL!
Ship repairs	Ship repairs3	Electrowelding	Nitrogen oxides	7	6	0.06	0.012	EPA	#NULL!	#NULL!
Ship repairs	Ship repairs3	Electrowelding	Nitrogen oxides	7	6	0.07	0.014	EPA	#NULL!	#NULL!
Ship repairs	Ship repairs3	Electrowelding	Nitrogen oxides	7	6	0.1	0.02	EPA	#NULL!	#NULL!
Ship repairs	Ship repairs3	Electrowelding	Nitrogen oxides	7	6	0.13	0.026	EPA	#NULL!	#NULL!
Ship repairs	Ship repairs3	Electrowelding	Nitrogen oxides	7	6	0.11	0.022	EPA	#NULL!	#NULL!
Ship repairs	Ship repairs3	Electrowelding	Nitrogen oxides	7	6	0.12	0.024	EPA	#NULL!	#NULL!
Ship repairs	Ship repairs3	Electrowelding	Nitrogen oxides	7	6	0.14	0.028	EPA	#NULL!	#NULL!
Ship repairs	Ship repairs3	Electrowelding	Nitrogen oxides	7	6	0.13	0.026	EPA	#NULL!	#NULL!
Ship repairs	Ship repairs3	Electrowelding	Nitrogen oxides	7	6	0.13	0.026	EPA	#NULL!	#NULL!
Ship repairs	Ship repairs3	Electrowelding	Nitrogen oxides	7	6	0.12	0.024	EPA	#NULL!	#NULL!
Ship repairs	Ship repairs3	Electrowelding	Nitrogen oxides	7	6	0.1	0.02	EPA	#NULL!	#NULL!
Ship repairs	Ship repairs3	Polishing	Grinding wheel dust	7	6	3.6	0.45	EPA	#NULL!	#NULL!
Ship repairs	Ship repairs3	Polishing	Grinding wheel dust	7	6	0.6	0.075	EPA	#NULL!	#NULL!
Ship repairs	Ship repairs3	Polishing	Grinding wheel dust	7	6	2	0.25	EPA	#NULL!	#NULL!
Ship repairs	Ship repairs3	Polishing	Grinding wheel dust	7	6	2	0.25	EPA	#NULL!	#NULL!
Ship repairs	Ship repairs3	Polishing	Grinding wheel dust	7	6	3.2	0.4	EPA	#NULL!	#NULL!
Ship repairs	Ship repairs3	Polishing	Grinding wheel dust	7	6	1.4	0.175	EPA	#NULL!	#NULL!
Ship repairs	Ship repairs3	Polishing	Grinding wheel dust	7	6	1.7	0.2125	EPA	#NULL!	#NULL!
Ship repairs	Ship repairs3	Polishing	Grinding wheel dust	7	6	1.9	0.2375	EPA	#NULL!	#NULL!
Ship repairs	Ship repairs3	Polishing	Grinding wheel dust	7	6	10.3	1.2875	EPA	#NULL!	#NULL!
Ship repairs	Ship repairs3	Polishing	Grinding wheel dust	7	6	13.4	1.675	EPA	#NULL!	#NULL!
Ship repairs	Ship repairs3	Polishing	Grinding wheel dust	7	6	3.8	0.475	EPA	#NULL!	#NULL!
Ship repairs	Ship repairs3	Polishing	Grinding wheel dust	7	6	4.3	0.5375	EPA	#NULL!	#NULL!
Ship repairs	Ship repairs3	Polishing	Grinding wheel dust	7	6	4	0.5	EPA	#NULL!	#NULL!
Ship repairs	Ship repairs3	Polishing	Grinding wheel dust	7	6	4.2	0.525	EPA	#NULL!	#NULL!
Ship repairs	Ship repairs3	Polishing	Grinding wheel dust	7	6	3.1	0.3875	EPA	#NULL!	#NULL!
Ship repairs	Ship repairs3	Polishing	Grinding wheel dust	7	6	0.9	0.1125	EPA	#NULL!	#NULL!
Ship repairs	Ship repairs3	Polishing	Grinding wheel dust	7	6	1.6	0.2	EPA	#NULL!	#NULL!
Ship repairs	Ship repairs3	Polishing	Grinding wheel dust	7	6	2.6	0.325	EPA	#NULL!	#NULL!
Ship repairs	Ship repairs3	Polishing	Grinding wheel dust	7	6	2.5	0.3125	EPA	#NULL!	#NULL!
Ship repairs	Ship repairs3	Polishing	Grinding wheel dust	7	6	2.7	0.3375	EPA	#NULL!	#NULL!
Ship repairs	Ship repairs3	Polishing	Grinding wheel dust	7	6	4	0.5	EPA	#NULL!	#NULL!
Ship repairs	Ship repairs3	Polishing	Grinding wheel dust	7	6	1.8	0.225	EPA	#NULL!	#NULL!
Ship repairs	Ship repairs3	Polishing	Grinding wheel dust	7	6	1.7	0.2125	EPA	#NULL!	#NULL!
Ship repairs	Ship repairs3	Polishing	Grinding wheel dust	7	6	1.8	0.225	EPA	#NULL!	#NULL!
Ship repairs	Ship repairs3	Polishing	Grinding wheel dust	7	6	1.7	0.2125	EPA	#NULL!	#NULL!
Ship repairs	Ship repairs3	Polishing	Grinding wheel dust	7	6	1.8	0.225	EPA	#NULL!	#NULL!
Ship repairs	Ship repairs3	Polishing	Grinding wheel dust	7	6	5.2	0.65	EPA	#NULL!	#NULL!
Ship repairs	Ship repairs3	Polishing	Grinding wheel dust	7	6	2.2	0.275	EPA	#NULL!	#NULL!
Ship repairs	Ship repairs3	Polishing	Grinding wheel dust	7	6	4.8	0.6	EPA	#NULL!	#NULL!
Ship repairs	Ship repairs3	Polishing	Grinding wheel dust	7	6	1.9	0.2375	EPA	#NULL!	#NULL!
Ship repairs	Ship repairs3	Polishing	Grinding wheel dust	7	6	2.6	0.325	EPA	#NULL!	#NULL!
Ship repairs	Ship repairs3	Polishing	Grinding wheel dust	7	6	2	0.25	EPA	#NULL!	#NULL!
Ship repairs	Ship repairs3	Polishing	Grinding wheel dust	7	6	3.2	0.4	EPA	#NULL!	#NULL!
Ship repairs	Ship repairs3	Polishing	Grinding wheel dust	7	6	4.8	0.6	EPA	#NULL!	#NULL!
Ship repairs	Ship repairs3	Polishing	Grinding wheel dust	7	6	4	0.5	EPA	#NULL!	#NULL!
Ship repairs	Ship repairs3	Polishing	Grinding wheel dust	7	6	3.5	0.4375	EPA	#NULL!	#NULL!
Ship repairs	Ship repairs3	Polishing	Grinding wheel dust	7	6	6.2	0.775	EPA	#NULL!	#NULL!
Ship repairs	Ship repairs3	Polishing	Grinding wheel dust	7	6	3.6	0.45	EPA	#NULL!	#NULL!
Ship repairs	Ship repairs3	Polishing	Grinding wheel dust	7	6	10.4	1.3	EPA	#NULL!	#NULL!
Ship repairs	Ship repairs3	Polishing	Grinding wheel dust	7	6	9.9	1.2375	EPA	#NULL!	#NULL!
Ship repairs	Ship repairs3	Polishing	Grinding wheel dust	7	6	10.3	1.2875	EPA	#NULL!	#NULL!
Ship repairs	Ship repairs3	Polishing	Grinding wheel dust	7	6	10.3	1.2875	EPA	#NULL!	#NULL!
Ship repairs	Ship repairs3	Polishing	Grinding wheel dust	7	6	10.8	1.35	EPA	#NULL!	#NULL!
Ship repairs	Ship repairs3	Polishing	Grinding wheel dust	7	6	10.3	1.2875	EPA	#NULL!	#NULL!
Ship repairs	Ship repairs3	Polishing	Grinding wheel dust	7	6	10.3	1.2875	EPA	#NULL!	#NULL!
Ship repairs	Ship repairs3	Polishing	Grinding wheel dust	7	6	1.2	0.15	EPA	#NULL!	#NULL!
Ship repairs	Ship repairs3	Polishing	Grinding wheel dust	7	6	10.6	1.325	EPA	#NULL!	#NULL!
Ship repairs	Ship repairs3	Polishing	Grinding wheel dust	7	6	12.8	1.6	EPA	#NULL!	#NULL!
Ship repairs	Ship repairs3	Spraying	Benzene	7	6	0.05	0.00833333	EPA	2	0.4
Ship repairs	Ship repairs3	Spraying	Benzene	7	6	0.05	0.00833333	EPA	2	0.4
Ship repairs	Ship repairs3	Spraying	Benzene	7	6	0.05	0.00833333	EPA	2	0.4
Ship repairs	Ship repairs3	Spraying	Benzene	7	6	0.05	0.00833333	EPA	2	0.4
Ship repairs	Ship repairs3	Spraying	Benzene	7	6	0.05	0.00833333	EPA	2	0.4
Ship repairs	Ship repairs3	Spraying	Benzene	7	6	0.05	0.00833333	EPA	2	0.4
Ship repairs	Ship repairs3	Spraying	Benzene	7	6	0.05	0.00833333	EPA	2	0.4
Ship repairs	Ship repairs3	Spraying	Benzene	7	6	0.05	0.00833333	EPA	2	0.4
Ship repairs	Ship repairs3	Spraying	Benzene	7	6	0.05	0.00833333	EPA	2	0.4
Ship repairs	Ship repairs3	Spraying	Xylene	7	6	0.05	0.001	EPA	2	0.4
Ship repairs	Ship repairs3	Spraying	Xylene	7	6	0.05	0.001	EPA	2	0.4
Ship repairs	Ship repairs3	Spraying	Xylene	7	6	0.05	0.001	EPA	2	0.4
Ship repairs	Ship repairs3	Spraying	Xylene	7	6	1.8	0.036	EPA	5	1
Ship repairs	Ship repairs3	Spraying	Xylene	7	6	116.2	2.324	EPA	5	1
Ship repairs	Ship repairs3	Spraying	Xylene	7	6	0.3	0.006	EPA	3	0.6
Ship repairs	Ship repairs3	Spraying	Xylene	7	6	105.9	2.118	EPA	5	1
Ship repairs	Ship repairs3	Spraying	Xylene	7	6	166.9	3.338	EPA	5	1
Ship repairs	Ship repairs3	Spraying	Xylene	7	6	0.2	0.004	EPA	3	0.6
Ship repairs	Ship repairs3	Spraying	Ethyl acetate	7	6	0.05	0.00025	EPA	1	0.2
Ship repairs	Ship repairs3	Spraying	Ethyl acetate	7	6	0.05	0.00025	EPA	1	0.2
Ship repairs	Ship repairs3	Spraying	Ethyl acetate	7	6	0.05	0.00025	EPA	1	0.2
Ship repairs	Ship repairs3	Spraying	Ethyl acetate	7	6	0.05	0.00025	EPA	1	0.2
Ship repairs	Ship repairs3	Spraying	Ethyl acetate	7	6	0.05	0.00025	EPA	1	0.2
Ship repairs	Ship repairs3	Spraying	Ethyl acetate	7	6	0.05	0.00025	EPA	1	0.2
Ship repairs	Ship repairs3	Spraying	Ethyl acetate	7	6	0.05	0.00025	EPA	1	0.2
Ship repairs	Ship repairs3	Spraying	Ethyl acetate	7	6	0.05	0.00025	EPA	1	0.2
Ship repairs	Ship repairs3	Spraying	Ethyl acetate	7	6	0.05	0.00025	EPA	1	0.2
Ship repairs	Ship repairs3	Sanding	Other dust）	7	6	6.6	0.825	EPA	#NULL!	#NULL!
Ship repairs	Ship repairs3	Sanding	Other dust）	7	6	0.6	0.075	EPA	#NULL!	#NULL!
Ship repairs	Ship repairs3	Sanding	Other dust）	7	6	1.1	0.1375	EPA	#NULL!	#NULL!
Ship repairs	Ship repairs3	Sanding	Other dust）	7	6	21.5	2.6875	EPA	#NULL!	#NULL!
Ship repairs	Ship repairs3	Sanding	Other dust）	7	6	21.5	2.6875	EPA	#NULL!	#NULL!
Ship repairs	Ship repairs3	Sanding	Other dust）	7	6	21.5	2.6875	EPA	#NULL!	#NULL!
Ship repairs	Ship repairs3	Sanding	Other dust）	7	6	21.5	2.6875	EPA	#NULL!	#NULL!
Ship repairs	Ship repairs3	Sanding	Other dust）	7	6	8.2	1.025	EPA	#NULL!	#NULL!
Ship repairs	Ship repairs3	Sanding	Other dust）	7	6	21.5	2.6875	EPA	#NULL!	#NULL!
Ship repairs	Ship repairs4	Electrowelding	Welding fume	7	6	0.65	0.1625	EPA	#NULL!	#NULL!
Ship repairs	Ship repairs4	Electrowelding	Welding fume	7	6	0.74	0.185	EPA	#NULL!	#NULL!
Ship repairs	Ship repairs4	Electrowelding	Welding fume	7	6	0.8	0.2	EPA	#NULL!	#NULL!
Ship repairs	Ship repairs4	Electrowelding	Welding fume	7	6	0.5	0.125	EPA	#NULL!	#NULL!
Ship repairs	Ship repairs4	Electrowelding	Welding fume	7	6	6	1.5	EPA	#NULL!	#NULL!
Ship repairs	Ship repairs4	Electrowelding	Welding fume	7	6	0.6	0.15	EPA	#NULL!	#NULL!
Ship repairs	Ship repairs4	Electrowelding	Welding fume	7	6	6.2	1.55	EPA	#NULL!	#NULL!
Ship repairs	Ship repairs4	Electrowelding	Welding fume	7	6	0.21	0.0525	EPA	#NULL!	#NULL!
[truncated: 7,115 more rows]
